# Supplementary material for: Transcriptome and Weighted Gene Co-Expression Network Analysis for Feather Follicle Density in a Chinese Indigenous Breed
Source: Animals (Basel). 2024 Jan 4;14(1):173. doi: 10.3390/ani14010173 (PMC10778273; doi:10.3390/ani14010173)
Supplement: Supplementary file 1 [file animals-14-00173-s001.zip › Supplementary Table.xls]

## Sheet: Table S1
Table S1. Primers for qRT-PCR
Gene ID	Gene name	Primer sequence (5’→3’)	Size(bp)
ENSGALG00010001237	MELK	F-TTCCGGCAGCGAAATTCAAA	243
		R-TACCTTTGCAAAACCACCCG
ENSGALG00010008212	GTSE1	F-CAGCAACAAAAGCAACACCG	188
		R-TGAGATACGACGGACAGGTG
ENSGALG00010024729	FOXM1	F-ATCCTACCATGCCCAACACA	186
		R-TTGAGGGAAGGTGCTGTGAT
ENSGALG00010016956	CENPE	F-AAGCGTCAGAAAGAGCAAGC	240
		R-CAAAGCACACTGTTTCCCCA
ENSGALG00010009353	CD72	F-GGGAAGGCTGAATGCTAGTG	195
		R-CGACTCCAGGATTTGGTGAT
ENSGALG00010009732	HMMR	F-CTGCAGCAAGAGAGGGAGAT	210
		R-CTGTGCAAGTTCAAGGGCTT
ENSGALG00010028239	EDMPN2	F-TACAGCAGCAAGTCCTGCAA	211
		R-CAGGGCTTTAGTTGCCACAG
ENSGALG00010028245	JAC1	F-TGTGGCTGTGGCAACTAAAG	201
		R-AGGCATTTGGTGATGAAAGG
ENSGALG00010027744	EDQCM	F-TCCCTCACTCACTTGTGCTG	168
		R-AGACCTCCACGCATTGTGTT
ENSGALG00010018662	PADI1	F-CAAGAGGGGAATCAACTCCA	169
		R-AGGGAAGGACTTGTGTGGTG
ENSGALG00010003756	MHCY7	F-CATCCGAGGGTACGTTCAGT	182
		R-TCAAGTTCTGGACGCAGATG
ENSGALG00010004319	TAAR1	F-ACCCAGAACAGCCATCAAAC	215
		R-ACTGCTGCCCAATACAAACC
ENSGALG00010018517	ECT2	F-ACCCACTATTCCCTTGCACA	152
		R-TTAGGCAAGCATGGGAGTCA
ENSGALG00010020623	NEK2	F-ACACCAGCTTTGCCAAAACT	201
		R-TTCGTCTGAACTTCCCCTCC
ENSGALG00010009597	CDK1	F-CACGGGGACTCAGAGATTGA	154
		R-AGTTTTGGACATGCGTTCCC
ENSGALG00000014442	GAPDH	F-CCTCTCTGGCAAAGTCCAAG	200
		R-CATCTGCCCATTTGATGTTG

## Sheet: Table S2
Table S2. Feather follicle density of Wannan male chickens at 12 weeks of age.
Trait (n=486)	Mean
feather follicle density(piece/cm2)	3.88±0.41

## Sheet: Table S3
Table S3: Summary of RNA-seq data.
Sample ID	Obtained Reads(bp)	OBtained Base(bp)	Q20(%)	Q30(%)	GC(%)	Mapped read ratio(%)
L1	43460090	6484738749	98.02	96.08	48.95	80.8757
L2	41722544	6203255638	96.73	93.69	49.15	90.4438
L3	31362730	4675991938	97.64	95.39	49.53	77.6584
L4	35167818	5240813532	97.56	95.24	49.52	85.0501
L5	37531514	5595743281	97.77	95.62	49.38	84.3545
L6	43250732	6442071584	97.25	94.63	50.7	87.656
L7	44874922	6686682831	97.41	94.96	49.55	90.4516
L8	57085604	8518340047	97.73	95.51	55.01	88.9052
L9	48565202	7245346873	98.07	96.2	51.79	84.9246
L10	57619842	8597696835	98	96.01	52.73	83.4065
L11	45241284	6749867748	97.83	95.73	53.85	84.0468
L12	40895736	6079951946	95.85	92.34	54.52	85.0994
L13	43859026	6543161784	97.97	95.99	50.86	84.2574
L14	43879842	6541518233	97.64	95.38	53.94	85.6453
L15	33894988	5049731046	97.28	94.71	51.35	85.0424

## Sheet: Table S4
Table S4. Detailed information on DEGs between H and L groups in chickens.
Gene ID	Gene Name	Log2FC(H/L)
ENSGALG00010009353	CD72	-4.27044
ENSGALG00010008203	CXCL13	-3.66269
ENSGALG00010007964	RECQL4	-2.82259
ENSGALG00010006514		-2.53289
ENSGALG00010010889	CCL19	-2.46562
ENSGALG00010001520	KCNAB1	-2.00732
ENSGALG00010002062	GSTA4	-1.89479
ENSGALG00010008212	GTSE1	-1.86104
ENSGALG00010009479	MTBP	-1.82741
ENSGALG00010028460	CRLF1	-1.81004
ENSGALG00010002462	RRM2	-1.78715
ENSGALG00010017105	PLK1	-1.78604
ENSGALG00010023359	CDCA3	-1.70326
ENSGALG00010029207		-1.69168
ENSGALG00010022953		-1.67725
ENSGALG00010007916	MCM3	-1.64808
ENSGALG00010024729	FOXM1	-1.60483
ENSGALG00010001854	CHRDL2	-1.56383
ENSGALG00010001237	MELK	-1.55328
ENSGALG00010016956	CENPE	-1.55302
ENSGALG00010020623	NEK2	-1.53339
ENSGALG00010018517	ECT2	-1.5269
ENSGALG00010014105	AHR1B	-1.49232
ENSGALG00010009732	HMMR	-1.49051
ENSGALG00010023574	DEPDC1	-1.46395
ENSGALG00010009597	CDK1	-1.44306
ENSGALG00010002750		-1.43563
ENSGALG00010015390	CCNB3	-1.40751
ENSGALG00010020759	ARHGAP19	-1.33215
ENSGALG00010003812	BG8	-1.32599
ENSGALG00010012871	CD274	-1.29544
ENSGALG00010023017	BUB1B	-1.26919
ENSGALG00010004489	LIG1	-1.22242
ENSGALG00010013501	AKR1B10	-1.17701
ENSGALG00010002814	TERF1	-1.02321
ENSGALG00010026036	TUBA5	-0.998321
ENSGALG00010022071	ACTA2	-0.851663
ENSGALG00010011589	RERG	-0.834061
ENSGALG00010010997	LAP3	-0.815209
ENSGALG00010028360		0.703735
ENSGALG00010002765	MAP7D2	0.708055
ENSGALG00010023612	GPT2	0.733277
ENSGALG00010005362	ATP1B1	0.737086
ENSGALG00010012892	ORMDL1	0.867492
ENSGALG00010017835		0.87353
ENSGALG00010026046		0.885641
ENSGALG00010022695	PIK3IP1	0.907741
ENSGALG00010007324	GAN	0.988316
ENSGALG00010027772		1.01237
ENSGALG00010023543	TMEM45BL	1.03712
ENSGALG00010025325	DPEP2	1.05831
ENSGALG00010028450	PTGDS	1.07564
ENSGALG00010002159	GALNT15	1.08346
ENSGALG00010000599	RETREG1	1.1044
ENSGALG00010020664	ESYT3	1.12715
ENSGALG00010016599		1.2343
ENSGALG00010029234	TOM1L1	1.24165
ENSGALG00010005851	SLC15A1	1.28448
ENSGALG00010012092	OC3	1.36038
ENSGALG00010010730		1.37803
ENSGALG00010025507	ATP12A	1.43917
ENSGALG00010016808	ENTPD3	1.45166
ENSGALG00010020424		1.46756
ENSGALG00010010736		1.50279
ENSGALG00010028351		1.5041
ENSGALG00010017056	AGTR1	1.50489
ENSGALG00010025973		1.51413
ENSGALG00010029679	OTOP2	1.61061
ENSGALG00010018426		1.61187
ENSGALG00010012083	MGP	1.61427
ENSGALG00010003205		1.61907
ENSGALG00010006605		1.73011
ENSGALG00010002457		1.75055
ENSGALG00010006816		1.78422
ENSGALG00010014555	VGLL1	1.8357
ENSGALG00010003722	MHCY11	1.83905
ENSGALG00010014538		2.41646
ENSGALG00010004319	TAAR1	2.47161
ENSGALG00010003756	MHCY7	2.53649
ENSGALG00010003389		3.44249
ENSGALG00010003767		3.72004
ENSGALG00010018662	PADI1	4.19282
ENSGALG00010009023		4.44598
ENSGALG00010025885		4.81241
ENSGALG00010027744	EDQCM	5.04943
ENSGALG00010027418		5.41226
ENSGALG00010028245	JAC1	5.48943
ENSGALG00010000509		5.49492
ENSGALG00010028790		5.5463
ENSGALG00010028239	EDMPN2	5.65398
ENSGALG00010025762		5.75511
ENSGALG00010025902		6.07462
ENSGALG00010025877		6.66724
ENSGALG00010025782		8.24045
ENSGALG00010026845		8.85015

## Sheet: Table S5
Table S5.Enriched GO and KEGG pathways for DEGs identified between H and L groups.
Source	Term	Pvalue	Number
GO:MF	structural constituent of cytoskeleton	0.000511496	8
GO:BP	mitotic cell cycle process	0.000721249	12
GO:BP	mitotic cell cycle	0.000721249	13
GO:BP	regulation of cell cycle process	0.00156625	11
GO:BP	cell cycle process	0.00221464	14
GO:BP	attachment of spindle microtubules to kinetochore	0.00221464	4
GO:BP	regulation of attachment of spindle microtubules to kinetochore	0.00310909	3
GO:BP	mitotic cell cycle phase transition	0.00350455	8
GO:BP	negative regulation of mitotic nuclear division	0.00350455	4
GO:BP	regulation of cell cycle	0.00350455	12
GO:BP	nuclear chromosome segregation	0.00350455	7
GO:BP	regulation of mitotic cell cycle phase transition	0.00350455	7
GO:BP	protein localization to chromosome	0.00350455	5
GO:BP	cell cycle	0.00350455	15
GO:BP	negative regulation of nuclear division	0.00356459	4
GO:BP	regulation of mitotic cell cycle	0.00607764	8
GO:BP	regulation of transferase activity	0.00705216	10
GO:BP	protein localization to chromosome, centromeric region	0.00736083	3
GO:BP	cell cycle phase transition	0.00788347	8
GO:BP	regulation of cell cycle phase transition	0.00914996	7
GO:BP	mitotic nuclear division	0.00914996	6
GO:BP	chromosome segregation	0.00937864	7
GO:BP	nuclear division	0.0108376	7
GO:BP	negative regulation of cell cycle process	0.0108831	6
GO:BP	regulation of mitotic nuclear division	0.013838	4
GO:BP	telomeric D-loop disassembly	0.0154411	2
GO:BP	organelle fission	0.0185805	7
GO:BP	sodium ion export across plasma membrane	0.0185805	2
GO:BP	intracellular potassium ion homeostasis	0.0185805	2
GO:BP	telomeric loop disassembly	0.0185805	2
GO:BP	negative regulation of mitotic cell cycle	0.0228848	5
GO:BP	regulation of chromosome organization	0.0258124	5
GO:BP	negative regulation of cell cycle	0.0267852	6
GO:BP	regulation of nuclear division	0.02691	4
GO:BP	G2/M transition of mitotic cell cycle	0.0296299	4
GO:BP	cell cycle G2/M phase transition	0.0424935	4
GO:BP	regulation of mitotic metaphase/anaphase transition	0.0425091	3
GO:BP	cytoskeleton organization	0.0429424	12
GO:BP	metaphase/anaphase transition of mitotic cell cycle	0.0455867	3
GO:BP	regulation of metaphase/anaphase transition of cell cycle	0.0465211	3
GO:BP	chromosome organization	0.0465211	7
GO:BP	intracellular sodium ion homeostasis	0.0479526	2
GO:BP	metaphase/anaphase transition of cell cycle	0.0491766	3
GO:CC	supramolecular complex	6.55365e-05	16
GO:CC	polymeric cytoskeletal fiber	6.55365e-05	12
GO:CC	supramolecular polymer	8.47596e-05	13
GO:CC	supramolecular fiber	8.47596e-05	13
GO:CC	cytoskeleton	0.000310683	20
GO:CC	midbody	0.000520063	6
GO:CC	intermediate filament	0.000655944	7
GO:CC	kinetochore	0.00116168	5
GO:CC	chromosomal region	0.00116168	7
GO:CC	intermediate filament cytoskeleton	0.00116168	7
GO:CC	condensed chromosome, centromeric region	0.00137061	5
GO:CC	spindle	0.00165058	7
GO:CC	microtubule cytoskeleton	0.00616374	12
GO:CC	chromosome, centromeric region	0.00616374	5
GO:CC	condensed chromosome	0.0106261	5
GO:CC	outer kinetochore	0.010633	2
GO:CC	spindle microtubule	0.0197038	3
GO:CC	microtubule	0.0205142	5
GO:CC	mitotic spindle	0.0205509	4
GO:CC	non-membrane-bounded organelle	0.0368259	25
GO:CC	intracellular non-membrane-bounded organelle	0.0368259	25
GO:CC	cyclin B1-CDK1 complex	0.0374428	1
GO:CC	spindle midzone	0.043459	2
KEGG	cell cycle	0.0113971	6

## Sheet: Table S6
Table S6.Gene list analyzed by WGCNA
Gene ID	H1	H2	H3	H4	H5	H6	H7	L1	L2	L3	L4	L5	L6	L7	L8
ENSGALG00010000003	12.5787	12.4248	12.5372	13.1967	13.6279	13.7945	13.8026	12.8183	13.566	12.4154	13.2547	14.0306	13.8482	13.3668	12.814
ENSGALG00010000005	12.7566	12.5227	13.1104	12.7234	13.213	13.1171	13.0452	13.2113	13.6681	12.5457	12.8691	13.1904	13.3617	12.3855	12.8554
ENSGALG00010000007	13.4296	12.4186	13.4826	13.6941	13.7867	13.8989	13.6624	13.6093	14.3332	13.1338	13.628	13.6497	14.3501	13.4406	13.445
ENSGALG00010000008	2.36818	3.15467	2.36818	2.36818	2.36818	3.12336	2.36818	2.97599	2.9634	2.36818	3.12136	3.09206	3.39194	3.10226	3.388
ENSGALG00010000009	6.90045	6.47024	7.06357	7.22081	6.86817	7.35375	7.13994	6.50691	7.59181	6.28346	7.45108	7.75444	6.68841	6.97964	7.26274
ENSGALG00010000011	11.9382	11.0403	11.8886	11.9594	12.1764	12.3015	11.9934	12.3706	12.7573	11.5809	12.0378	11.9122	12.837	11.5514	11.613
ENSGALG00010000012	5.96191	4.68966	4.91805	5.18175	4.51944	5.02969	5.3023	5.74251	6.67062	5.10656	6.34426	5.1201	5.12356	5.03253	5.35927
ENSGALG00010000013	4.7723	4.32209	4.74626	4.32109	4.40004	5.02969	4.46461	4.403	5.61474	4.28722	5.96433	4.805	5.30264	4.68241	5.69881
ENSGALG00010000014	2.36818	2.36818	2.36818	2.36818	2.36818	2.36818	2.36818	2.97599	2.36818	2.36818	2.36818	3.09206	2.96741	2.36818	2.36818
ENSGALG00010000015	2.36818	2.36818	2.36818	2.92738	3.19006	2.36818	2.36818	2.36818	2.9634	2.36818	2.36818	2.36818	2.36818	2.36818	2.36818
ENSGALG00010000016	5.19231	4.64306	5.91203	6.00237	6.23618	5.8846	5.71668	5.66451	4.06671	4.77952	5.05636	6.22897	4.30919	5.74235	6.8563
ENSGALG00010000017	16.5344	15.84	16.6514	16.9169	17.0142	17.0077	16.6269	16.7127	17.6932	16.5213	17.0282	17.0517	17.5032	16.7885	16.6943
ENSGALG00010000018	12.5225	11.9218	13.0072	12.7749	12.8307	12.9583	12.7899	12.4595	13.3386	12.3779	12.9895	13.0296	12.2738	12.7123	12.3658
ENSGALG00010000019	2.36818	2.36818	2.36818	2.36818	3.19006	2.36818	2.36818	2.36818	2.36818	2.36818	2.36818	2.36818	2.36818	2.36818	2.36818
ENSGALG00010000020	15.0041	14.2641	15.0901	15.084	15.2957	15.2815	15.0006	15.1989	15.9636	14.8233	15.4267	15.3272	15.822	15.1211	14.8147
ENSGALG00010000022	4.73065	4.125	5.07056	5.11651	6.33218	5.98762	4.55124	5.74251	5.21885	4.77952	5.44425	5.3764	5.70831	5.15078	4.66739
ENSGALG00010000023	12.8796	11.7062	13.1029	12.9953	12.9132	13.2536	12.5371	13.1257	13.7023	12.8902	12.9787	12.9683	13.4051	12.9039	12.549
ENSGALG00010000024	15.7127	15.1084	15.869	15.7175	16.0236	15.9947	15.5313	15.917	16.6568	15.6303	16.0943	15.8488	16.2538	15.6492	15.3838
ENSGALG00010000026	11.8191	10.7671	11.9502	11.9901	12.0793	12.3118	11.5421	12.3284	12.5706	11.7645	12.2105	11.9398	12.0982	12.1689	11.6047
ENSGALG00010000028	9.94263	9.13319	10.0744	10.5442	10.8496	10.8037	10.5477	10.5138	10.939	10.1277	10.4726	10.5592	11.0056	10.2628	10.3991
ENSGALG00010000029	12.8795	12.0289	12.9805	13.2307	13.2184	13.4259	13.1012	13.1573	14.0396	12.7867	13.1019	13.134	14.0299	12.9825	13.0181
ENSGALG00010000033	12.8632	11.9101	12.8019	13.1143	13.1966	13.2788	12.974	13.1921	13.7809	12.6384	13.1226	13.1169	14.1228	13.0176	13.001
ENSGALG00010000034	13.7512	12.9511	13.9194	13.958	14.2788	14.2862	13.9958	14.07	14.8596	13.6558	14.123	14.0523	14.9636	13.9231	13.8613
ENSGALG00010000035	2.91444	2.36818	2.36818	2.92738	2.36818	3.42463	2.36818	3.80759	3.38526	2.91642	3.42189	2.36818	2.96741	2.36818	2.36818
ENSGALG00010000036	3.76668	2.92771	3.29159	3.32518	3.19006	3.83221	3.91005	3.4062	3.88354	3.13898	3.9855	4.18175	4.56415	4.20483	4.3024
ENSGALG00010000037	8.80161	8.43474	9.09961	9.45425	9.58761	8.49956	10.2899	9.06036	9.63098	9.16097	9.39474	10.0555	8.87155	9.88131	8.46212
ENSGALG00010000038	3.13622	3.59031	3.0266	3.46686	3.19006	3.64872	3.91005	4.33372	4.71401	3.5667	3.9855	3.92692	3.39194	3.39571	3.53812
ENSGALG00010000039	11.9291	12.0419	12.0976	12.5342	12.5925	12.467	12.6333	12.2518	12.3137	12.1123	12.8296	12.3575	12.4561	12.3725	12.4265
ENSGALG00010000040	2.91444	2.92771	2.36818	2.36818	2.36818	2.36818	3.08366	2.36818	2.36818	2.36818	2.36818	2.36818	2.36818	3.10226	2.36818
ENSGALG00010000042	2.36818	3.69959	3.79447	5.14952	7.10342	5.8846	4.91549	4.26041	4.81225	2.91642	3.54014	6.723	6.00282	4.90312	5.15261
ENSGALG00010000043	7.3942	7.1362	6.76227	7.55826	7.27377	6.90801	6.86261	6.81238	6.76845	7.04012	6.96051	6.68619	7.22206	7.02581	7.57253
ENSGALG00010000044	9.382	9.52068	9.33536	8.53132	7.80513	8.28868	8.31607	9.43655	9.40113	9.3312	9.33329	7.90591	7.92146	8.24736	8.49476
ENSGALG00010000045	8.78701	8.91785	8.97339	8.85142	8.75488	8.68856	9.0392	8.88129	8.85509	8.87127	8.79287	8.97736	9.08824	8.92352	8.97261
ENSGALG00010000046	9.16006	9.12305	9.17802	8.82168	9.36465	8.72356	8.92458	9.0144	9.52325	9.28831	9.4373	9.0369	9.16746	8.87397	9.04295
ENSGALG00010000047	12.0196	12.0638	11.7225	11.5709	11.9225	11.4061	11.586	12.0461	11.5045	11.7421	12.0046	11.5524	12.1822	11.5182	11.8602
ENSGALG00010000048	8.7065	8.0413	8.78939	9.28474	9.28329	9.65511	9.07778	8.52842	9.02764	8.75007	8.92265	9.41341	9.44504	9.46523	9.19852
ENSGALG00010000049	7.34847	7.40099	7.83946	6.18576	6.09725	7.16274	6.53895	7.12316	7.91333	8.03895	8.26094	5.97715	5.19799	5.74235	6.12929
ENSGALG00010000050	10.3278	10.1097	10.2532	10.2865	9.9459	10.059	9.86987	10.0553	10.2578	10.4168	10.5193	9.97599	9.61426	9.98021	9.37834
ENSGALG00010000051	8.07362	7.80798	7.74691	8.54353	8.0309	8.05736	7.5224	7.82	6.86005	8.40617	8.29771	7.85717	6.77448	7.68302	7.82164
ENSGALG00010000052	7.28051	7.06162	7.16618	7.3859	4.99399	6.97604	6.92561	6.73874	7.53048	7.57957	6.80173	6.20309	6.71353	6.89924	7.32057
ENSGALG00010000053	6.30198	6.29277	7.144	6.74782	6.39278	6.48584	6.36775	6.33408	7.24673	6.90106	6.6126	5.84915	6.34662	6.31553	6.39929
ENSGALG00010000054	10.0227	9.77492	10.231	10.3373	10.7948	10.3083	10.2148	9.84818	10.2858	10.2808	10.2218	10.4526	10.3816	10.4547	10.3123
ENSGALG00010000055	7.6199	8.49574	8.44889	8.97368	8.04037	8.19201	9.17803	8.79026	8.86063	8.63702	9.41161	8.85034	9.27659	9.12047	8.81211
ENSGALG00010000056	9.89007	9.65339	10.2363	10.0235	10.3722	10.2934	9.87784	9.87843	9.94982	10.0175	9.74983	10.3045	10.1139	9.97043	9.90349
ENSGALG00010000057	2.36818	2.36818	2.36818	2.36818	3.19006	3.83221	3.08366	2.97599	2.36818	2.36818	2.36818	2.36818	2.36818	3.10226	2.96504
ENSGALG00010000058	9.61897	9.90959	9.90033	10.0759	10.3515	10.4374	9.93053	9.71402	9.47889	9.91526	9.72428	10.5426	10.0366	9.92453	9.91559
ENSGALG00010000059	9.31571	9.38811	9.26526	9.24979	9.50798	9.69848	9.34548	9.03245	9.57812	9.28483	9.32035	9.59027	9.83443	9.49831	9.41669
ENSGALG00010000060	8.76481	8.52991	9.07933	9.43963	9.89724	9.89767	9.58587	8.66362	9.4571	8.73992	8.888	10.0429	9.70921	9.70838	9.11469
ENSGALG00010000061	6.39517	6.5932	6.28208	6.64941	6.50679	6.94243	6.70988	6.13747	6.48151	6.05567	6.4905	6.86146	6.79815	6.58636	6.9846
ENSGALG00010000062	3.56255	4.86135	3.49004	4.54354	3.19006	5.09373	3.91005	4.01002	3.97873	4.45539	3.64546	4.39248	4.50497	3.39571	4.66739
ENSGALG00010000063	8.38302	8.14115	8.95442	9.35044	9.02657	8.41643	8.6545	8.56076	8.60391	8.36051	8.33678	9.00744	7.4777	8.94766	8.40603
ENSGALG00010000064	2.36818	2.36818	2.36818	2.36818	2.36818	2.36818	2.36818	2.36818	2.36818	2.36818	2.36818	3.77479	2.36818	2.36818	2.36818
ENSGALG00010000065	2.91444	3.15467	3.49004	4.38042	3.75681	2.36818	3.37016	3.4062	2.36818	4.02051	3.54014	3.77479	4.56415	3.39571	4.37086
ENSGALG00010000066	2.36818	2.36818	2.36818	2.36818	2.36818	2.36818	3.08366	2.36818	2.36818	2.36818	2.36818	2.36818	2.36818	3.10226	3.53812
ENSGALG00010000067	2.91444	2.36818	2.36818	2.36818	2.36818	2.36818	2.36818	2.36818	2.36818	2.36818	2.36818	2.36818	3.20974	2.36818	3.388
ENSGALG00010000068	2.36818	2.36818	2.36818	3.15421	2.36818	3.42463	2.36818	2.36818	2.36818	2.36818	2.36818	2.36818	2.36818	3.10226	2.36818
ENSGALG00010000069	8.44946	7.4984	9.30574	6.29129	4.62881	5.26976	5.3497	8.31745	9.39159	8.70903	8.62942	5.42246	5.26862	5.58534	5.32688
ENSGALG00010000070	3.13622	2.36818	2.36818	2.36818	2.36818	3.12336	2.36818	3.22162	2.36818	2.36818	2.36818	2.36818	2.36818	3.10226	2.36818
ENSGALG00010000071	2.91444	2.36818	2.36818	2.92738	2.36818	3.83221	2.36818	2.36818	2.36818	2.36818	2.36818	2.36818	2.96741	2.36818	2.96504
ENSGALG00010000072	3.66965	2.36818	3.0266	3.15421	2.36818	2.36818	2.36818	2.36818	2.36818	2.36818	2.36818	2.36818	2.36818	2.36818	2.36818
ENSGALG00010000074	2.36818	2.36818	2.36818	2.36818	2.36818	2.36818	3.08366	2.36818	2.9634	2.91642	2.90375	2.36818	2.36818	2.36818	2.36818
ENSGALG00010000075	3.44225	2.92771	3.0266	3.69886	2.36818	2.36818	4.27158	3.80759	3.38526	3.13898	2.36818	3.09206	2.36818	4.20483	3.20646
ENSGALG00010000076	5.56115	5.70817	5.6198	6.02005	6.58671	6.23066	5.71668	5.86367	5.58795	5.44861	5.29104	5.46705	6.19402	5.88368	6.12929
ENSGALG00010000078	3.44225	2.36818	2.36818	2.36818	2.36818	2.36818	4.63249	2.36818	3.53501	3.44602	3.90973	4.39248	2.36818	2.36818	2.96504
ENSGALG00010000081	7.34182	6.96488	6.70276	7.26574	7.48277	7.40397	7.00066	8.16213	7.50237	7.39122	7.08828	7.49243	7.87777	7.05578	7.23722
ENSGALG00010000082	4.73065	4.77825	4.9708	5.14952	5.07177	4.81733	5.20238	4.09937	4.71401	4.45539	4.64945	5.59291	4.44297	4.51193	5.11497
ENSGALG00010000084	2.91444	3.69959	3.65355	4.86017	4.82372	4.2523	4.0431	4.01002	4.71401	3.67413	4.12376	4.57328	4.62078	3.79355	5.07627
ENSGALG00010000085	7.11866	6.60494	7.27223	7.68489	7.7134	7.51096	7.73053	6.98148	6.5101	7.35174	6.64417	7.58516	7.59705	7.4435	7.91572
ENSGALG00010000086	4.08723	4.64306	5.5189	5.59276	2.36818	6.50902	4.97787	5.03398	4.76403	4.77952	4.60553	3.59763	4.72724	5.31113	5.59447
ENSGALG00010000087	3.30352	2.36818	3.29159	3.15421	2.36818	3.12336	2.36818	2.36818	2.36818	2.36818	2.90375	3.3817	2.36818	2.36818	2.36818
ENSGALG00010000088	2.36818	2.36818	3.0266	2.36818	2.36818	2.36818	3.91005	2.36818	2.36818	2.36818	2.36818	2.36818	2.36818	3.39571	4.07099
ENSGALG00010000089	5.4148	5.72992	5.83051	6.79971	7.15668	6.90801	6.00777	5.07535	5.53279	5.86196	5.44425	6.60961	5.39997	6.1301	6.33642
ENSGALG00010000090	4.54966	2.36818	6.99085	6.27668	5.57398	5.77353	6.41251	5.46377	5.44577	4.45539	3.12136	4.87412	6.04316	4.08302	5.59447
ENSGALG00010000091	3.66965	4.05154	4.47626	2.92738	2.36818	3.12336	2.36818	4.26041	4.85881	4.50689	4.51303	2.36818	2.36818	2.36818	3.388
ENSGALG00010000092	8.07362	7.86265	7.75424	6.94501	6.78034	7.64226	6.77977	7.5243	8.33187	7.87234	7.66586	7.00279	7.73814	7.23673	7.17587
ENSGALG00010000093	3.56255	4.38145	4.03167	3.58963	2.36818	2.36818	2.36818	2.97599	6.10364	4.09288	3.74093	2.36818	2.36818	2.36818	3.98283
ENSGALG00010000094	2.91444	2.36818	3.0266	2.36818	2.36818	3.12336	2.36818	2.97599	3.88354	3.5667	3.64546	2.36818	2.96741	2.36818	3.20646
ENSGALG00010000095	2.36818	2.36818	2.36818	2.92738	2.36818	2.36818	2.36818	2.36818	3.97873	2.36818	2.90375	2.36818	2.36818	2.36818	2.36818
ENSGALG00010000096	2.91444	2.36818	2.36818	2.36818	2.36818	2.36818	2.36818	4.46873	5.21885	2.91642	3.64546	2.36818	2.96741	2.36818	2.36818
ENSGALG00010000098	7.70528	8.29721	8.18159	7.31644	7.22475	7.2339	7.47059	7.89523	7.96057	8.0717	8.12245	7.07568	6.58328	6.86577	7.05447
ENSGALG00010000099	2.36818	3.15467	2.36818	3.15421	2.36818	2.36818	2.36818	2.36818	3.38526	2.36818	2.36818	2.36818	2.36818	2.36818	2.36818
ENSGALG00010000101	2.36818	2.36818	3.91923	2.36818	2.36818	2.36818	2.36818	2.36818	2.9634	2.91642	2.36818	2.36818	2.36818	2.36818	2.36818
ENSGALG00010000102	4.39535	4.25981	4.13432	3.79776	4.26834	3.98948	4.16268	3.55874	4.71401	3.77145	3.54014	3.3817	3.54258	3.94737	2.96504
ENSGALG00010000103	2.36818	2.92771	2.36818	4.73355	2.36818	3.12336	2.36818	2.36818	3.66453	2.91642	3.12136	2.36818	2.96741	2.36818	2.96504
ENSGALG00010000104	4.8127	5.04927	5.20783	4.86017	3.19006	3.42463	4.97787	4.90181	5.66684	4.73779	4.51303	4.39248	4.62078	3.79355	3.78323
ENSGALG00010000105	4.7723	4.68966	4.13432	4.38042	3.51578	4.12801	3.37016	4.01002	4.29767	4.55642	4.24782	3.92692	3.89304	4.31567	3.78323
ENSGALG00010000106	3.8557	2.36818	4.13432	4.77709	4.62881	4.6546	3.91005	4.26041	2.9634	3.67413	3.42189	5.22836	4.77745	4.08302	4.90953
ENSGALG00010000107	2.36818	2.36818	2.36818	2.36818	2.36818	2.36818	2.36818	2.36818	2.36818	2.91642	2.36818	2.36818	3.20974	2.36818	3.20646
ENSGALG00010000108	2.36818	2.36818	2.36818	3.32518	3.75681	2.36818	2.36818	2.36818	3.38526	4.40176	3.28561	2.36818	2.36818	3.10226	2.96504
ENSGALG00010000109	3.13622	2.36818	3.0266	3.69886	2.36818	2.36818	2.36818	2.97599	4.81225	3.44602	2.36818	3.3817	3.20974	2.36818	3.88744
ENSGALG00010000110	2.91444	3.97323	2.36818	3.88844	3.19006	3.42463	2.36818	2.36818	3.53501	4.45539	4.30548	2.36818	2.96741	3.10226	3.78323
ENSGALG00010000111	2.91444	2.36818	2.36818	3.97238	3.19006	3.12336	3.75932	3.55874	2.36818	2.36818	3.12136	4.06115	3.20974	3.10226	4.66739
ENSGALG00010000112	2.36818	2.36818	2.36818	3.97238	2.36818	2.36818	2.36818	2.36818	2.9634	3.44602	3.42189	2.36818	2.36818	2.36818	3.53812
ENSGALG00010000113	4.01505	4.86135	3.0266	4.32109	3.51578	3.42463	2.36818	3.4062	4.66204	6.0054	4.24782	3.09206	3.39194	4.20483	4.86446
ENSGALG00010000114	4.15531	2.36818	3.0266	3.88844	2.36818	3.98948	2.36818	2.36818	5.07033	3.13898	3.12136	3.77479	2.36818	3.61431	3.20646
ENSGALG00010000115	2.36818	2.36818	2.36818	2.36818	2.36818	2.36818	2.36818	2.36818	3.20418	2.36818	3.28561	3.09206	2.36818	2.36818	2.96504
ENSGALG00010000116	2.36818	2.36818	3.29159	3.15421	2.36818	2.36818	2.36818	2.36818	2.9634	2.91642	3.12136	2.36818	2.36818	2.36818	2.36818
ENSGALG00010000117	2.36818	2.36818	2.36818	5.04803	2.36818	2.36818	2.36818	2.36818	3.66453	3.13898	2.90375	2.36818	2.36818	3.39571	5.88691
ENSGALG00010000119	2.36818	2.36818	4.47626	4.12408	3.19006	2.36818	2.36818	4.403	4.76403	3.13898	3.90973	2.36818	2.36818	3.10226	3.53812
ENSGALG00010000120	2.36818	2.36818	2.36818	2.92738	2.36818	2.36818	2.36818	2.36818	3.53501	2.36818	2.36818	2.36818	2.96741	2.36818	2.96504
ENSGALG00010000121	6.7273	6.86116	7.03973	7.91369	7.36708	7.5781	7.29103	7.09395	7.15936	7.06476	7.12599	7.75444	7.89978	7.18344	7.68998
ENSGALG00010000122	3.44225	3.69959	2.36818	3.58963	3.19006	2.36818	3.08366	2.97599	4.90382	4.02051	3.42189	2.36818	2.36818	3.10226	3.66794
ENSGALG00010000123	5.94435	5.85382	5.25072	5.66227	7.30555	5.61044	6.63641	5.46377	5.90196	4.77952	5.49181	7.32322	7.50668	6.18558	7.03485
ENSGALG00010000125	3.30352	4.86135	5.91203	3.32518	4.51944	4.36529	4.70903	4.26041	2.36818	4.45539	2.36818	4.06115	4.62078	3.39571	4.15308
ENSGALG00010000126	6.65389	6.32155	6.5078	6.93577	6.02235	7.041	6.89445	6.46181	6.43752	6.76726	6.34426	6.66742	6.0824	7.24975	6.27066
ENSGALG00010000127	5.97926	5.89283	6.36134	7.15068	7.55062	7.81918	7.00066	6.53621	5.78927	5.91746	6.47887	7.66286	6.96425	7.58373	7.94752
ENSGALG00010000128	2.36818	2.36818	2.36818	2.36818	2.36818	2.36818	2.36818	2.36818	2.36818	2.36818	2.36818	3.3817	2.36818	2.36818	2.36818
ENSGALG00010000129	2.36818	2.92771	3.0266	4.86017	4.40004	4.46906	4.46461	3.55874	4.36601	3.13898	3.64546	4.93989	4.44297	3.79355	4.71944
ENSGALG00010000130	4.15531	6.8215	7.71719	8.13952	8.60346	7.45251	8.25615	7.26092	8.15814	7.39122	8.29771	7.84055	9.6076	7.80264	8.52667
ENSGALG00010000132	2.36818	3.46747	2.36818	2.92738	2.36818	2.36818	2.36818	2.36818	2.36818	2.36818	2.36818	2.36818	2.36818	2.36818	2.36818
ENSGALG00010000133	8.02879	7.69201	8.43982	8.25904	8.12289	8.00953	8.25002	8.19456	8.62687	8.58126	8.25075	8.2955	8.3589	8.48593	8.03889
ENSGALG00010000134	8.36017	8.41492	8.53654	8.78361	8.64749	8.85564	8.20002	8.12895	8.73345	8.75764	8.42101	8.96974	8.38253	8.65191	8.50903
ENSGALG00010000135	5.94435	5.64086	6.1764	6.53152	6.06029	6.76144	6.24933	5.30049	5.66684	6.49208	5.93044	5.81526	5.16127	5.91692	5.74822
ENSGALG00010000137	4.68767	3.97323	4.74626	7.11838	6.42214	8.03365	4.46461	4.01002	5.07033	5.28806	4.12376	7.44922	4.56415	7.21033	5.6476
ENSGALG00010000138	4.44886	3.79854	5.25072	5.18175	4.91152	4.73844	4.91549	4.09937	4.94739	4.34578	3.90973	4.805	5.00381	4.96936	4.76954
ENSGALG00010000139	2.36818	2.36818	3.49004	2.92738	2.36818	2.36818	2.36818	2.97599	2.9634	2.36818	2.90375	3.09206	2.36818	2.36818	2.36818
ENSGALG00010000140	8.77225	8.50201	9.00138	10.0727	9.89464	9.6421	9.84772	9.2486	9.24881	9.18361	9.2072	9.80029	9.35633	9.76383	9.66468
ENSGALG00010000141	11.6616	11.4862	11.6822	11.3121	10.8293	11.2425	11.0224	11.4243	11.4894	11.7847	11.3533	10.9513	10.8895	11.1463	11.1745
ENSGALG00010000142	3.13622	3.97323	2.36818	3.58963	2.36818	2.36818	2.36818	3.55874	3.66453	2.36818	2.36818	2.36818	2.36818	3.39571	3.66794
ENSGALG00010000143	9.74018	10.1769	10.0207	9.44289	9.42371	9.48197	9.07432	10.089	9.80495	10.5375	9.78674	8.87094	8.40962	8.80074	9.01322
ENSGALG00010000145	9.43136	9.29003	9.93138	8.50972	8.14938	8.00141	8.60733	9.47477	10.0659	9.7732	8.64766	8.25845	7.21329	7.61424	8.38683
ENSGALG00010000146	7.18709	7.39426	7.07534	6.66069	7.4966	7.55607	6.94093	7.44945	7.4518	7.91357	7.5542	6.97256	5.26862	6.66634	6.54537
ENSGALG00010000147	8.02464	8.11683	8.34589	8.52518	8.65367	8.77213	7.82431	8.35072	7.66971	8.37042	8.52616	8.80824	7.70101	8.55568	7.9264
ENSGALG00010000148	7.13415	6.5932	7.13278	7.25835	7.55062	6.76144	6.76262	6.87098	7.20371	7.56238	7.05739	7.15855	6.96425	6.64676	7.06418
ENSGALG00010000149	8.10537	7.95702	8.09761	8.65737	8.20936	8.93884	8.4289	7.98804	8.28728	8.42846	8.63204	8.91921	8.28557	8.91129	8.55102
ENSGALG00010000150	7.69488	8.09624	8.12615	8.43963	8.16677	8.47041	7.79934	8.26606	8.65586	8.65874	8.61094	8.48917	7.52096	8.181	7.65831
ENSGALG00010000152	6.30198	6.09012	6.13184	6.34826	6.33218	6.50902	6.14698	6.1565	6.70809	6.72662	6.58032	6.17673	6.29754	5.77903	6.45952
ENSGALG00010000153	10.6491	10.491	10.3567	10.6858	10.6446	10.7944	10.7316	10.5616	10.7496	10.5977	10.5362	10.7503	10.8512	10.5887	10.5966
ENSGALG00010000155	7.51147	7.4984	7.03973	7.95082	7.20803	8.14851	7.44933	7.45711	7.71328	7.87234	7.50357	7.53438	7.49226	7.64412	7.91572
ENSGALG00010000156	3.66965	2.92771	3.29159	2.36818	2.36818	2.36818	5.09469	2.36818	3.20418	2.91642	2.90375	3.92692	2.36818	2.36818	2.36818
ENSGALG00010000160	2.36818	2.36818	2.36818	2.36818	2.36818	2.36818	2.36818	2.36818	3.20418	3.5667	2.36818	3.3817	2.96741	2.36818	2.36818
ENSGALG00010000161	6.80684	6.09012	6.54219	6.32006	6.33218	5.37583	6.00777	7.06414	6.94615	6.71628	6.85663	6.30392	6.75041	5.66603	5.99296
ENSGALG00010000163	2.36818	2.36818	2.36818	3.15421	2.36818	2.36818	3.08366	2.36818	2.36818	2.91642	2.36818	2.36818	2.36818	2.36818	2.36818
ENSGALG00010000164	2.36818	2.36818	2.36818	2.92738	2.36818	3.12336	3.08366	2.36818	2.36818	2.36818	2.36818	2.36818	2.36818	2.36818	2.36818
ENSGALG00010000165	2.36818	2.36818	2.36818	3.32518	2.36818	2.36818	2.36818	2.36818	2.36818	2.91642	2.90375	2.36818	2.36818	2.36818	2.36818
ENSGALG00010000166	9.30721	8.7141	9.23938	9.77454	9.78631	10.059	9.56873	9.02731	9.30071	9.22241	9.06516	10.1206	9.35633	9.55965	9.36074
ENSGALG00010000168	2.36818	3.32572	2.36818	2.36818	2.36818	3.98948	2.36818	2.36818	2.36818	2.36818	2.36818	3.09206	2.36818	3.10226	2.36818
ENSGALG00010000169	2.36818	2.92771	2.36818	2.92738	2.36818	2.36818	2.36818	2.36818	2.36818	3.30684	3.54014	2.36818	2.36818	3.10226	2.96504
ENSGALG00010000170	3.44225	3.69959	3.0266	3.58963	2.36818	2.36818	4.46461	2.36818	4.2254	2.36818	3.54014	4.65509	2.36818	3.39571	2.36818
ENSGALG00010000171	8.49211	8.20792	8.52801	8.55863	8.60346	8.10366	8.4611	8.14327	8.40958	8.33376	8.49771	8.57705	8.9788	8.40685	8.56132
ENSGALG00010000173	7.30124	7.32513	7.7688	7.5217	7.73688	7.96006	7.58221	7.04392	7.59181	8.07575	7.8706	7.39331	7.29035	7.61424	7.84434
ENSGALG00010000174	9.45927	9.35211	8.99211	9.92433	10.5351	10.1756	10.4047	9.43461	9.98704	10.2623	9.48009	9.59027	9.97319	10.4406	9.16962
ENSGALG00010000175	2.91444	2.36818	2.36818	4.25883	3.75681	3.98948	4.16268	2.36818	2.36818	2.36818	3.12136	2.36818	3.39194	2.36818	5.35927
ENSGALG00010000176	7.49956	7.91061	7.4812	6.64941	4.91152	6.28547	7.33806	5.95366	7.33708	7.92258	6.66484	7.50303	5.60383	7.26265	5.56713
ENSGALG00010000177	8.4182	8.26437	8.19781	8.63189	9.09175	9.03353	8.80425	8.09499	8.0555	8.60382	8.43007	8.97736	9.03704	8.97141	8.45107
ENSGALG00010000178	2.36818	2.36818	2.36818	2.92738	2.36818	2.36818	3.08366	2.36818	2.36818	2.36818	2.36818	2.36818	3.54258	3.10226	3.66794
ENSGALG00010000179	7.85757	7.79782	7.56702	8.36253	8.9075	8.39177	8.4289	7.38664	7.43702	8.12729	7.83009	8.71561	8.21272	8.53458	8.27853
ENSGALG00010000180	3.30352	2.92771	2.36818	2.92738	3.19006	3.83221	2.36818	3.4062	2.36818	2.36818	2.36818	2.36818	2.36818	2.36818	2.36818
ENSGALG00010000181	6.06298	5.61768	6.28208	5.46869	5.72398	5.52124	5.25323	6.33408	5.32065	6.02236	5.91319	5.27947	5.39997	5.09292	5.51081
ENSGALG00010000183	3.8557	3.59031	4.39904	4.12408	4.12108	2.36818	3.37016	4.33372	4.36601	4.16114	3.74093	3.59763	3.98872	2.36818	3.98283
ENSGALG00010000184	3.44225	2.36818	2.36818	2.36818	2.36818	2.36818	2.36818	2.36818	2.36818	2.36818	2.36818	2.36818	2.36818	2.36818	2.36818
ENSGALG00010000185	3.30352	2.92771	2.36818	2.36818	2.36818	2.36818	2.36818	2.36818	2.36818	3.13898	2.36818	2.36818	2.36818	2.36818	2.36818
ENSGALG00010000186	9.19552	9.17697	9.38579	9.46871	9.58761	9.50515	9.45877	9.33216	9.55608	9.518	9.24534	9.60264	9.66493	9.36421	9.25253
ENSGALG00010000187	2.91444	3.79854	3.79447	3.46686	2.36818	2.36818	2.36818	3.4062	2.9634	3.86072	3.54014	2.36818	2.96741	3.39571	2.36818
ENSGALG00010000189	5.09875	5.21454	4.61815	5.49439	4.72982	2.36818	4.37175	4.01002	2.36818	3.30684	4.56009	4.73215	4.44297	4.83349	2.96504
ENSGALG00010000190	2.91444	2.36818	2.36818	2.36818	2.36818	2.36818	2.36818	2.36818	3.20418	2.91642	3.12136	2.36818	2.36818	2.36818	2.36818
ENSGALG00010000191	4.64325	3.32572	4.31686	3.32518	2.36818	2.36818	3.08366	3.80759	4.43087	4.22579	4.30548	3.3817	3.39194	4.08302	3.53812
ENSGALG00010000192	3.44225	3.32572	4.03167	2.36818	2.36818	2.36818	2.36818	2.36818	2.36818	2.36818	3.42189	2.36818	2.36818	3.10226	2.36818
ENSGALG00010000193	6.53036	7.14425	6.81942	6.08867	6.02235	5.42599	6.84642	6.31728	7.4881	7.47323	6.73492	5.97715	6.52768	6.72354	6.21927
ENSGALG00010000194	7.30808	6.60494	6.74762	7.58803	7.8162	7.2339	6.51863	6.93829	7.63776	7.36502	7.20562	8.02836	6.85568	7.82019	2.96504
ENSGALG00010000195	7.103	6.44432	6.80534	7.55223	7.4966	7.48786	6.19907	6.94921	7.55806	6.80678	6.92671	7.65338	6.86691	7.57341	3.20646
ENSGALG00010000196	3.56255	2.92771	2.36818	4.38042	3.19006	2.36818	3.37016	3.55874	3.20418	2.36818	2.90375	3.3817	3.98872	3.10226	3.78323
ENSGALG00010000197	4.64325	4.05154	4.31686	4.64195	2.36818	3.42463	3.08366	3.55874	2.36818	2.36818	3.54014	3.09206	2.96741	4.08302	3.20646
ENSGALG00010000198	4.01505	2.36818	2.36818	3.15421	2.36818	2.36818	3.08366	2.97599	2.9634	2.36818	3.64546	2.36818	2.96741	2.36818	3.20646
ENSGALG00010000199	3.13622	5.68609	3.79447	2.36818	2.36818	3.12336	2.36818	2.36818	3.38526	4.73779	3.28561	4.18175	3.54258	2.36818	3.388
ENSGALG00010000200	5.03265	4.125	4.91805	2.36818	2.36818	3.12336	2.36818	4.7028	5.28753	4.69472	4.99087	2.36818	2.36818	3.10226	3.20646
ENSGALG00010000201	2.36818	2.92771	2.36818	2.36818	2.36818	3.12336	2.36818	2.36818	2.9634	2.36818	2.36818	3.09206	2.36818	2.36818	3.20646
ENSGALG00010000202	9.41404	8.50201	8.75326	8.94637	8.83864	9.71844	8.79585	8.54648	9.16616	9.58616	8.00607	9.45766	7.93751	8.16048	8.87406
ENSGALG00010000203	2.36818	2.36818	2.36818	2.36818	3.19006	2.36818	2.36818	2.36818	2.36818	2.36818	2.36818	2.36818	2.36818	3.10226	2.36818
ENSGALG00010000204	2.36818	2.36818	2.36818	2.36818	2.36818	2.36818	2.36818	2.36818	2.36818	2.36818	3.64546	2.36818	2.36818	2.36818	3.53812
ENSGALG00010000205	8.1441	8.33635	8.48459	9.03977	9.74349	9.91292	9.28082	7.82	8.15814	8.58976	8.03803	10.0042	8.7973	9.51725	8.83211
ENSGALG00010000206	2.36818	2.36818	2.36818	2.36818	2.36818	2.36818	2.36818	2.36818	3.20418	2.36818	2.36818	3.09206	2.36818	2.36818	2.36818
ENSGALG00010000210	5.73528	5.9494	5.98913	5.79182	5.21529	5.65301	5.39554	5.03398	5.71709	5.72334	5.39502	6.58981	5.0449	6.04261	4.61322
ENSGALG00010000214	2.36818	2.36818	2.36818	2.36818	2.36818	2.36818	2.36818	2.36818	2.36818	2.36818	2.36818	2.36818	2.36818	2.36818	3.20646
ENSGALG00010000215	9.73765	9.7593	10.0523	10.2082	10.3381	10.1185	10.2719	9.85544	9.74627	9.94539	10.0045	10.0465	10.6995	10.3469	10.2887
ENSGALG00010000216	2.36818	2.36818	3.0266	3.46686	2.36818	2.36818	3.91005	2.36818	2.9634	2.36818	2.90375	3.3817	2.96741	2.36818	2.36818
ENSGALG00010000217	2.36818	3.88926	2.36818	3.58963	2.36818	4.2523	4.37175	2.36818	2.36818	2.36818	3.28561	4.06115	2.36818	2.36818	2.36818
ENSGALG00010000218	2.36818	2.36818	2.36818	3.46686	2.36818	2.36818	3.08366	2.36818	2.36818	2.36818	2.90375	2.36818	2.36818	2.36818	2.36818
ENSGALG00010000219	2.91444	3.15467	2.36818	4.1933	2.36818	3.64872	2.36818	2.36818	2.9634	2.36818	2.90375	3.3817	2.36818	2.36818	2.96504
ENSGALG00010000220	3.30352	2.92771	2.36818	2.92738	2.36818	2.36818	5.3023	2.36818	3.20418	3.30684	4.46419	5.1201	2.36818	3.10226	2.36818
ENSGALG00010000221	9.32754	9.11694	9.41383	9.89845	10.1629	10.275	9.72494	9.20834	9.31694	9.60725	9.20545	10.3492	9.74307	9.78632	9.6962
ENSGALG00010000222	3.44225	2.36818	2.36818	2.36818	2.36818	2.36818	3.37016	2.36818	3.77956	2.91642	2.90375	3.3817	2.96741	2.36818	2.36818
ENSGALG00010000223	6.07915	6.33572	6.76227	8.84651	9.88679	9.99705	8.37922	6.70046	6.67062	7.16691	6.47887	10.33	8.45863	9.5439	8.23197
ENSGALG00010000224	3.13622	2.92771	3.0266	3.15421	3.51578	4.46906	3.37016	3.22162	2.36818	3.30684	2.90375	3.3817	2.36818	3.10226	2.96504
ENSGALG00010000225	5.48988	4.68966	4.54913	4.49142	4.62881	6.05237	3.08366	6.56493	5.41552	5.8992	4.64945	3.92692	3.20974	3.94737	2.96504
ENSGALG00010000226	4.54966	4.49248	4.80599	4.81927	3.51578	4.46906	4.16268	4.80598	4.43087	4.28722	4.05664	4.39248	5.00381	3.79355	4.22999
ENSGALG00010000227	4.50023	4.32209	4.54913	5.3037	5.52022	5.09373	4.97787	4.59096	3.53501	5.34365	4.41345	4.57328	3.89304	5.25971	5.22497
ENSGALG00010000228	2.36818	2.36818	2.36818	2.36818	2.36818	2.36818	2.36818	2.36818	3.66453	3.44602	2.36818	2.36818	2.36818	3.79355	2.36818
ENSGALG00010000229	3.13622	3.15467	2.36818	2.36818	2.36818	2.36818	2.36818	3.22162	2.36818	3.13898	2.36818	2.36818	2.36818	2.36818	2.96504
ENSGALG00010000230	2.36818	2.36818	3.0266	3.46686	2.36818	2.36818	3.08366	2.36818	2.36818	3.44602	3.42189	3.3817	3.67284	3.39571	3.388
ENSGALG00010000231	3.13622	2.36818	4.31686	2.92738	2.36818	2.36818	3.37016	4.09937	4.60795	3.5667	3.12136	3.09206	3.67284	3.39571	3.53812
ENSGALG00010000232	7.71561	7.57185	7.99612	8.30635	8.39053	8.48797	8.14822	7.64325	7.90798	8.20315	7.83009	8.37265	8.01013	8.20123	8.3074
ENSGALG00010000233	3.44225	3.88926	3.79447	3.46686	3.51578	3.64872	4.16268	3.69057	2.9634	3.77145	4.77312	3.77479	2.36818	4.51193	3.20646
ENSGALG00010000235	2.36818	2.36818	3.0266	3.79776	3.51578	3.98948	3.08366	4.18253	2.9634	3.13898	2.36818	3.92692	3.98872	3.94737	2.36818
ENSGALG00010000238	2.36818	2.36818	2.36818	2.36818	2.36818	3.42463	2.36818	2.36818	2.36818	4.09288	2.36818	3.09206	2.36818	2.36818	2.36818
ENSGALG00010000241	3.13622	2.36818	3.29159	2.36818	2.36818	2.36818	2.36818	3.22162	3.20418	2.91642	2.90375	2.36818	2.36818	2.36818	2.36818
ENSGALG00010000242	4.64325	5.52099	6.97836	4.32109	3.75681	3.98948	5.03752	6.71333	5.53279	5.34365	5.29104	5.06262	5.16127	4.08302	5.84217
ENSGALG00010000247	6.98834	6.7173	6.71787	5.89141	6.63762	7.16274	7.07198	6.3671	7.33708	6.90106	6.47887	6.20309	6.2118	6.41161	6.94309
ENSGALG00010000254	2.36818	2.36818	2.36818	2.92738	3.19006	2.36818	2.36818	2.36818	2.36818	3.13898	2.36818	2.36818	3.39194	2.36818	2.96504
ENSGALG00010000255	9.76523	9.87618	9.93138	10.6865	11.0907	11.1184	10.7771	9.78722	10.463	10.0133	10.3161	11.2149	10.6718	10.6415	10.3876
ENSGALG00010000256	2.36818	2.36818	2.36818	2.36818	2.36818	2.36818	2.36818	2.36818	2.36818	2.36818	2.36818	2.36818	2.36818	2.36818	2.36818
ENSGALG00010000262	2.36818	2.92771	3.0266	2.36818	2.36818	2.36818	2.36818	2.36818	2.36818	2.36818	2.36818	2.36818	2.36818	2.36818	2.36818
ENSGALG00010000263	10.94	11.5023	11.3673	11.0305	11.5342	11.8832	11.4502	10.9729	10.9344	11.0499	10.6038	11.5568	11.0537	11.4	11.1889
ENSGALG00010000267	7.45711	7.47307	8.2712	8.107	7.72519	7.96006	7.61121	7.79604	8.40579	8.13892	7.47464	7.81525	7.37139	7.82889	7.34467
ENSGALG00010000269	2.36818	3.15467	2.36818	3.15421	2.36818	2.36818	3.75932	2.36818	2.36818	2.36818	2.36818	3.59763	3.20974	2.36818	3.20646
ENSGALG00010000271	4.08723	4.38145	4.13432	4.64195	3.51578	3.12336	4.37175	5.07535	5.07033	3.30684	3.54014	5.17529	4.44297	4.08302	4.07099
ENSGALG00010000272	4.01505	4.90107	4.03167	4.97596	3.19006	3.12336	3.75932	2.97599	4.36601	3.94339	3.12136	3.92692	3.20974	3.79355	3.88744
ENSGALG00010000273	3.30352	2.36818	2.36818	3.15421	2.36818	3.42463	2.36818	3.80759	3.20418	4.02051	2.36818	3.77479	2.36818	2.36818	3.20646
ENSGALG00010000277	3.13622	2.92771	3.29159	2.36818	2.36818	3.42463	2.36818	2.36818	2.36818	3.5667	2.36818	2.36818	2.36818	2.36818	2.36818
ENSGALG00010000279	6.12659	6.30723	6.97836	7.4968	6.82492	7.6733	7.07198	6.71333	7.0567	6.797	6.85663	7.48175	7.23944	7.18344	6.73988
ENSGALG00010000280	3.30352	2.36818	2.36818	2.36818	2.36818	3.12336	2.36818	2.36818	2.9634	3.77145	3.28561	2.36818	2.36818	2.36818	2.36818
ENSGALG00010000281	7.82456	8.66183	7.98992	7.72296	8.50435	8.57815	7.73053	7.93417	8.16264	7.60217	7.59776	9.1491	8.39032	8.78742	7.48855
ENSGALG00010000283	2.36818	2.92771	3.0266	3.97238	2.36818	2.36818	2.36818	2.36818	3.97873	4.73779	5.89572	2.36818	2.36818	3.10226	2.36818
ENSGALG00010000284	5.92656	5.96777	6.19817	6.94501	6.56056	6.74202	6.81348	6.07879	6.52418	6.3653	6.20982	6.84487	5.91852	6.58636	6.07245
ENSGALG00010000285	2.36818	2.36818	2.36818	2.36818	2.36818	2.36818	4.16268	2.36818	2.36818	2.36818	2.36818	2.36818	2.36818	3.10226	2.96504
ENSGALG00010000286	8.76977	8.39484	8.95123	8.33822	8.32232	8.78166	8.27439	8.79933	8.86891	9.19108	9.09395	8.44038	8.4512	8.28576	8.17939
ENSGALG00010000287	4.01505	4.59476	4.03167	4.93844	6.06029	5.26976	6.09292	4.85474	4.2254	4.55642	5.17866	4.57328	5.8056	6.1301	5.74822
ENSGALG00010000288	7.72586	7.00966	8.08021	7.87558	7.01003	7.65268	7.02961	7.41051	7.95021	8.18455	7.60845	7.88175	7.27358	7.57341	7.37617
ENSGALG00010000289	3.8557	2.36818	3.91923	7.67383	4.40004	7.21995	7.95068	4.18253	6.39214	3.86072	4.18736	3.3817	4.37784	7.85467	7.07383
ENSGALG00010000292	6.03008	6.1715	6.19817	6.71576	6.86817	7.07242	6.74525	6.0176	6.22956	6.8919	6.2515	6.86146	6.04316	6.43465	6.57288
ENSGALG00010000293	4.08723	3.97323	3.49004	3.58963	3.51578	4.46906	3.08366	4.85474	3.97873	4.97078	4.24782	3.09206	2.96741	3.61431	3.88744
ENSGALG00010000294	3.93813	4.32209	4.91805	4.38042	5.21529	5.15493	5.25323	3.55874	4.2254	4.40176	4.73316	4.65509	5.36827	5.36072	5.56713
ENSGALG00010000295	2.36818	2.36818	2.36818	2.92738	3.19006	2.36818	2.36818	2.36818	2.36818	2.36818	2.36818	2.36818	2.96741	3.39571	2.36818
ENSGALG00010000297	2.91444	2.36818	3.29159	3.32518	2.36818	3.12336	2.36818	3.22162	3.53501	3.13898	3.54014	2.36818	2.96741	2.36818	2.36818
ENSGALG00010000298	6.4582	6.18723	7.28241	7.46506	8.70218	8.80519	8.21897	7.2344	5.71709	6.60856	6.31836	8.30159	6.37843	7.79378	7.12111
ENSGALG00010000300	2.91444	2.36818	2.36818	2.36818	2.36818	2.36818	2.36818	2.36818	2.9634	2.36818	2.36818	3.09206	2.36818	2.36818	2.36818
ENSGALG00010000301	9.53842	9.54518	9.85673	10.5578	11.246	11.2278	10.9411	9.62506	9.89954	9.52541	9.84322	11.0503	10.3248	10.9481	10.2731
ENSGALG00010000302	7.32842	6.94657	7.36141	7.20552	6.63762	6.41395	6.65514	7.33766	7.17726	7.71016	7.53192	6.97256	7.15953	6.56564	7.13038
ENSGALG00010000303	9.20104	8.87741	9.48165	10.0408	10.1542	10.2287	9.85379	9.02474	9.22322	9.58332	9.72305	10.2106	10.1465	10.0562	10.0667
ENSGALG00010000305	2.36818	2.92771	2.36818	2.36818	2.36818	2.36818	2.36818	2.36818	2.36818	2.36818	2.36818	2.36818	3.54258	2.36818	2.36818
ENSGALG00010000306	7.11085	7.51091	7.58358	6.97238	6.73432	7.0568	6.86261	7.434	7.72549	7.48544	7.30757	6.87787	6.90009	6.76044	7.21996
ENSGALG00010000307	8.73722	8.50514	8.83505	8.59132	8.46271	9.05724	8.62165	8.03996	9.04235	8.81919	8.43907	9.0478	8.34693	8.71424	8.24907
ENSGALG00010000308	5.79542	5.0137	5.02159	5.51964	5.14539	4.89186	4.97787	4.80598	5.3846	5.28806	4.56009	5.3764	5.70831	5.15078	4.95316
ENSGALG00010000310	5.71465	5.57017	5.55334	5.49439	6.09725	5.84854	6.09292	5.71699	5.44577	5.56965	5.58236	5.22836	5.63068	5.62626	6.1106
ENSGALG00010000312	2.36818	2.92771	2.36818	3.97238	3.19006	3.12336	3.91005	2.97599	2.36818	2.36818	3.12136	3.09206	3.20974	4.08302	4.81783
ENSGALG00010000314	2.36818	2.92771	2.36818	3.32518	2.36818	3.98948	2.36818	2.36818	4.06671	3.44602	2.36818	2.36818	2.36818	2.36818	3.20646
ENSGALG00010000315	2.36818	2.36818	2.36818	2.36818	2.36818	2.36818	2.36818	2.36818	2.9634	2.36818	2.36818	2.36818	2.36818	2.36818	2.96504
ENSGALG00010000316	2.36818	2.36818	2.36818	2.92738	2.36818	2.36818	2.36818	2.36818	3.97873	2.91642	2.90375	2.36818	2.36818	2.36818	3.388
ENSGALG00010000317	2.36818	3.15467	2.36818	3.79776	2.36818	3.12336	2.36818	2.36818	4.14864	2.91642	2.36818	2.36818	2.36818	2.36818	2.36818
ENSGALG00010000320	2.36818	2.36818	2.36818	3.69886	2.36818	3.42463	2.36818	2.36818	3.66453	2.36818	2.90375	2.36818	2.36818	2.36818	2.96504
ENSGALG00010000321	2.36818	2.36818	2.36818	3.15421	2.36818	2.36818	2.36818	2.36818	2.9634	2.36818	2.36818	2.36818	2.96741	2.36818	2.36818
ENSGALG00010000323	9.19367	8.7488	9.05282	9.42981	9.64457	9.43448	9.31351	9.06788	8.90691	9.30217	9.1462	9.62706	9.5652	9.43992	9.34293
ENSGALG00010000324	5.56115	5.44384	5.25072	6.18576	5.90206	6.02036	6.03672	5.46377	5.32065	5.13851	5.78617	6.17673	6.44001	6.1301	6.93253
ENSGALG00010000325	2.36818	2.36818	2.36818	2.36818	2.36818	2.36818	2.36818	2.36818	2.36818	2.36818	3.12136	2.36818	2.36818	2.36818	2.36818
ENSGALG00010000328	2.36818	2.36818	2.36818	2.36818	2.36818	2.36818	2.36818	2.36818	3.20418	2.36818	2.36818	2.36818	2.36818	2.36818	2.36818
ENSGALG00010000329	2.36818	2.36818	2.36818	3.15421	3.19006	2.36818	2.36818	2.36818	4.2254	2.36818	2.36818	2.36818	2.36818	2.36818	2.96504
ENSGALG00010000331	7.40062	6.75989	7.40867	6.63805	5.85959	6.05237	5.43993	7.10375	7.04699	7.78614	7.36544	6.27937	6.24672	5.88368	6.63943
ENSGALG00010000333	2.36818	2.36818	3.0266	2.36818	3.19006	2.36818	2.36818	2.36818	2.9634	2.36818	2.90375	2.36818	2.36818	2.36818	2.96504
ENSGALG00010000335	2.36818	2.36818	2.36818	3.15421	2.36818	2.36818	2.36818	2.36818	3.38526	2.36818	2.90375	2.36818	2.36818	2.36818	3.388
ENSGALG00010000337	2.36818	2.36818	3.0266	4.38042	2.36818	2.36818	2.36818	2.36818	3.97873	2.36818	2.90375	3.3817	2.36818	2.36818	3.388
ENSGALG00010000338	6.91847	6.89019	6.90109	7.35159	6.53393	7.26141	7.01521	6.62068	7.0075	6.5746	7.02581	7.19826	7.02567	6.54462	7.22862
ENSGALG00010000340	8.33361	7.68099	8.2402	9.38136	9.14974	9.02153	9.35693	8.01941	8.33187	8.24323	8.12989	9.80672	9.98352	8.96354	9.51718
ENSGALG00010000341	9.91267	9.83578	10.1978	10.2469	10.0919	9.74302	10.1439	9.93161	10.5599	9.99744	9.85336	10.0465	10.1929	10.0469	10.0077
ENSGALG00010000342	2.91444	2.36818	2.36818	3.15421	3.19006	3.12336	2.36818	2.36818	4.14864	2.36818	2.36818	2.36818	2.36818	2.36818	2.36818
ENSGALG00010000344	2.36818	2.36818	2.36818	3.88844	2.36818	3.12336	2.36818	2.36818	3.77956	3.13898	2.36818	2.36818	2.36818	3.61431	3.20646
ENSGALG00010000346	8.50109	8.08792	8.19242	8.58838	8.49749	8.72849	8.57337	8.37113	7.95021	8.42213	8.47746	8.69265	8.37076	8.90308	8.83211
ENSGALG00010000347	2.36818	2.36818	2.36818	4.64195	2.36818	3.83221	2.36818	2.36818	5.25361	2.36818	2.90375	2.36818	2.36818	2.36818	3.53812
ENSGALG00010000349	4.54966	4.38145	5.71397	3.79776	4.62881	5.9541	2.36818	4.7028	4.2254	5.86196	5.74769	4.29153	4.72724	4.51193	4.81783
ENSGALG00010000350	9.99758	10.1281	10.0222	10.2928	10.5131	10.4789	10.3369	10.0118	9.85996	10.1296	9.86677	10.4236	10.6925	10.3754	10.5499
ENSGALG00010000351	2.36818	2.92771	2.36818	3.46686	3.19006	3.12336	2.36818	2.36818	3.20418	2.91642	3.28561	2.36818	2.36818	3.39571	2.96504
ENSGALG00010000353	9.20104	9.02628	9.83788	9.98037	9.93832	10.0958	9.29279	9.21738	9.52325	9.52836	9.09015	9.99112	8.78553	10.0691	9.25887
ENSGALG00010000356	5.97926	5.70817	5.77344	6.38955	4.91152	5.9541	5.3023	6.9708	5.74156	6.50417	6.15229	5.94622	5.00381	6.04261	6.01325
ENSGALG00010000357	2.91444	3.69959	3.29159	6.94501	2.36818	4.89186	2.36818	2.36818	5.14658	4.28722	4.18736	2.36818	3.20974	3.39571	5.45214
ENSGALG00010000359	2.36818	2.36818	2.36818	2.36818	2.36818	2.36818	2.36818	2.36818	2.36818	3.13898	2.36818	2.36818	2.36818	2.36818	2.36818
ENSGALG00010000360	3.44225	4.32209	4.9708	4.12408	4.12108	4.73844	3.58388	3.4062	2.9634	4.77952	4.88636	4.18175	3.54258	3.61431	3.53812
ENSGALG00010000361	2.36818	3.69959	3.29159	7.31644	3.19006	5.52124	2.36818	2.36818	5.98609	5.65951	4.60553	3.59763	2.36818	3.61431	6.09165
ENSGALG00010000362	3.56255	2.36818	2.36818	2.36818	2.36818	2.36818	2.36818	2.36818	2.36818	2.36818	3.28561	2.36818	2.36818	3.39571	2.36818
ENSGALG00010000363	2.36818	2.92771	3.29159	3.15421	3.19006	2.36818	3.37016	2.36818	3.88354	2.36818	2.36818	3.09206	3.20974	2.36818	3.388
ENSGALG00010000364	4.3395	6.36365	4.80599	3.46686	4.26834	4.56511	5.48295	5.26541	5.98609	6.12006	5.49181	3.92692	4.77745	4.08302	4.43584
ENSGALG00010000365	2.36818	2.36818	2.36818	3.97238	2.36818	3.42463	2.36818	2.36818	3.66453	3.13898	3.12136	2.36818	2.36818	2.36818	3.20646
ENSGALG00010000366	5.4653	5.70817	5.91203	10.5548	9.35331	10.7502	10.4415	7.2344	5.98609	6.07204	6.38224	10.3492	10.0179	11.4065	9.58778
ENSGALG00010000367	9.35915	8.92721	9.24459	9.89726	10.3927	10.3344	9.97021	9.11462	9.66781	9.33289	9.42828	10.3594	9.58061	9.94266	9.5207
ENSGALG00010000368	2.36818	2.36818	2.36818	3.79776	2.36818	3.42463	2.36818	2.36818	5.10898	4.02051	3.90973	2.36818	2.36818	2.36818	2.36818
ENSGALG00010000371	4.15531	2.92771	4.54913	3.32518	4.91152	3.42463	4.46461	3.22162	4.60795	4.60415	3.74093	3.92692	3.67284	4.51193	3.388
ENSGALG00010000372	3.66965	2.36818	3.29159	2.36818	3.19006	3.12336	3.58388	2.97599	3.20418	2.36818	2.90375	4.805	2.96741	3.10226	2.96504
ENSGALG00010000373	2.91444	2.36818	3.0266	2.92738	2.36818	2.36818	3.37016	2.97599	4.06671	3.13898	3.64546	3.09206	2.96741	2.36818	2.36818
ENSGALG00010000375	2.36818	2.36818	2.36818	3.69886	5.85959	5.15493	4.85012	2.36818	2.36818	2.36818	2.36818	4.29153	3.54258	5.09292	4.43584
ENSGALG00010000376	8.71681	8.7141	8.8385	8.66298	9.72013	9.75997	9.37676	8.29626	8.45427	8.57841	8.8022	9.22146	9.20108	9.17604	9.10062
ENSGALG00010000377	6.07915	5.91194	5.88537	6.48151	6.71075	6.17367	6.86261	6.21213	6.45233	5.84297	6.16689	6.20309	7.42553	6.5233	6.53141
ENSGALG00010000378	2.36818	2.36818	2.36818	3.32518	2.36818	3.12336	2.36818	2.36818	4.66204	2.36818	2.36818	3.59763	2.36818	2.36818	4.07099
ENSGALG00010000379	2.36818	2.36818	2.36818	3.15421	4.12108	4.73844	3.75932	2.36818	2.36818	3.13898	2.36818	3.59763	2.96741	4.41755	3.66794
ENSGALG00010000380	2.36818	2.36818	3.0266	3.32518	4.99399	4.81733	4.16268	2.36818	2.36818	2.36818	2.90375	4.18175	3.20974	4.41755	3.20646
ENSGALG00010000381	3.30352	3.15467	2.36818	3.88844	3.51578	3.42463	2.36818	3.22162	2.9634	2.36818	2.36818	2.36818	3.39194	3.10226	4.95316
ENSGALG00010000382	5.25135	4.59476	4.39904	5.54443	5.52022	5.91978	5.25323	4.80598	4.49261	4.82	5.08797	5.67098	5.6829	4.20483	6.01325
ENSGALG00010000383	2.36818	2.36818	3.0266	2.36818	2.36818	2.36818	2.36818	2.36818	2.9634	3.5667	2.36818	2.36818	2.36818	2.36818	2.36818
ENSGALG00010000384	8.04934	7.81808	7.09859	7.78596	8.43427	7.589	8.07381	7.66987	6.86005	7.73593	7.75993	8.2955	8.05495	7.69258	8.54063
ENSGALG00010000386	6.07915	6.1715	5.65189	5.8123	5.85959	4.89186	5.68031	6.57907	5.94464	5.54626	5.58236	6.30392	7.04557	6.04261	6.23661
ENSGALG00010000387	3.66965	3.79854	3.49004	5.38862	4.82372	4.2523	5.68031	4.18253	3.77956	4.09288	3.12136	5.91459	5.60383	6.29047	5.25977
ENSGALG00010000388	7.08717	6.53304	6.90109	7.19781	7.44047	7.42844	7.36101	6.67436	6.72037	7.16691	6.66484	7.60498	7.33952	7.14213	7.16688
ENSGALG00010000389	2.36818	2.36818	2.36818	2.36818	2.36818	2.36818	3.75932	2.36818	2.9634	2.36818	2.36818	2.36818	2.36818	2.36818	2.36818
ENSGALG00010000390	2.36818	2.36818	2.36818	3.15421	2.36818	2.36818	2.36818	2.97599	3.20418	2.36818	2.90375	2.36818	2.36818	3.10226	2.96504
ENSGALG00010000391	3.13622	2.36818	2.36818	2.36818	2.36818	2.36818	2.36818	3.4062	2.9634	3.13898	3.12136	2.36818	2.36818	2.36818	2.36818
ENSGALG00010000392	3.56255	2.36818	4.39904	3.97238	2.36818	4.56511	4.27158	3.4062	2.36818	4.28722	4.24782	4.06115	2.36818	4.51193	2.36818
ENSGALG00010000393	5.60674	5.52099	4.91805	6.05477	5.98337	5.3238	5.56524	5.63753	5.44577	5.39711	5.86014	6.3518	6.29754	5.31113	6.23661
ENSGALG00010000394	2.36818	2.36818	3.49004	2.36818	2.36818	2.36818	2.36818	2.36818	2.36818	2.91642	2.90375	2.36818	2.36818	2.36818	2.36818
ENSGALG00010000395	6.44582	6.05622	5.83051	7.50931	7.28975	6.90801	6.94093	6.68747	6.48151	6.71628	6.6232	6.9572	5.8056	7.08514	7.06418
ENSGALG00010000396	4.3395	5.89283	3.79447	2.92738	3.19006	4.46906	5.14958	5.11551	5.66684	6.12006	5.08797	4.06115	4.37784	3.61431	4.07099
ENSGALG00010000397	5.89031	6.80126	6.96577	6.53152	6.84671	6.89048	7.1266	6.46181	6.00637	6.52803	6.79238	6.42073	5.73326	5.98115	6.67793
ENSGALG00010000398	6.44582	6.86116	6.74762	6.26192	6.33218	6.74202	6.74525	6.76371	6.10364	6.67416	6.78296	6.48649	6.04316	6.43465	6.67793
ENSGALG00010000399	5.51404	5.75134	5.96389	6.17003	6.09725	5.65301	5.91721	5.63753	5.61474	5.70238	6.16689	5.91459	4.82584	5.03253	5.74822
ENSGALG00010000400	5.36242	5.305	5.55334	6.59168	6.3628	6.5543	5.91721	5.95366	5.90196	5.91746	6.06141	6.64841	5.8056	6.93194	6.18396
ENSGALG00010000401	2.36818	2.36818	3.0266	2.36818	3.19006	2.36818	2.36818	2.36818	2.36818	2.91642	2.36818	2.36818	2.36818	2.36818	2.36818
ENSGALG00010000402	8.36674	7.54778	8.31648	8.35216	8.64749	8.6784	8.39597	7.696	8.50117	8.0918	7.83009	8.45137	7.36349	8.44693	8.17492
ENSGALG00010000403	2.36818	2.36818	2.36818	2.92738	3.51578	2.36818	3.08366	2.36818	2.36818	2.36818	3.28561	2.36818	3.20974	2.36818	2.36818
ENSGALG00010000404	3.8557	3.15467	3.29159	3.58963	3.51578	3.42463	3.08366	3.4062	5.83542	3.86072	3.42189	4.29153	2.96741	3.79355	3.53812
ENSGALG00010000405	5.06609	4.43816	3.79447	4.25883	4.51944	3.83221	3.91005	4.53128	4.14864	4.34578	4.24782	3.92692	2.96741	4.41755	3.66794
ENSGALG00010000406	8.71938	8.64208	9.02278	8.62041	8.86018	9.22365	8.81674	8.68334	9.19058	8.77762	8.24048	8.2771	8.46602	8.99478	8.92551
ENSGALG00010000407	10.4838	10.1681	10.608	10.8972	11.2265	11.2749	10.8659	10.4248	10.6297	10.8217	10.4258	11.3574	10.5274	11.0914	10.6707
ENSGALG00010000411	2.36818	2.36818	3.0266	2.36818	3.51578	2.36818	2.36818	3.69057	2.36818	2.36818	2.90375	3.09206	2.96741	2.36818	2.36818
ENSGALG00010000412	7.81978	7.41437	7.70967	7.99148	7.25762	7.89134	8.54361	7.55319	8.40958	8.01389	8.21274	8.13442	7.88331	8.16048	8.02406
ENSGALG00010000413	7.55237	7.18385	7.25163	6.73721	7.38206	7.10316	7.37235	7.36235	8.27902	7.24084	6.73492	7.22413	7.56296	7.01058	7.35261
ENSGALG00010000415	2.36818	2.36818	2.36818	2.36818	2.36818	2.36818	2.36818	2.36818	2.36818	2.36818	2.36818	2.36818	2.36818	2.36818	2.96504
ENSGALG00010000416	2.91444	2.36818	2.36818	3.32518	2.36818	2.36818	2.36818	2.36818	2.36818	2.36818	2.36818	2.36818	2.96741	2.36818	2.36818
ENSGALG00010000418	4.28108	3.69959	5.33273	3.88844	3.19006	3.64872	5.75213	3.4062	3.53501	3.30684	3.28561	3.3817	2.96741	5.15078	3.388
ENSGALG00010000419	2.91444	2.36818	3.65355	2.92738	3.19006	3.83221	2.36818	2.36818	2.36818	2.91642	2.36818	2.36818	2.36818	2.36818	2.36818
ENSGALG00010000420	3.30352	2.36818	3.79447	2.36818	2.36818	2.36818	2.36818	2.97599	2.36818	2.36818	2.36818	2.36818	2.36818	2.36818	2.36818
ENSGALG00010000421	4.01505	3.97323	5.372	3.58963	2.36818	4.12801	5.09469	2.97599	4.29767	2.36818	4.12376	2.36818	2.36818	5.5432	3.78323
ENSGALG00010000422	4.59728	4.68966	5.41019	5.36088	5.52022	4.6546	4.70903	4.7028	5.10898	5.34365	4.30548	4.73215	5.08479	5.49975	3.88744
ENSGALG00010000423	7.96098	8.02831	7.64011	6.55589	5.85959	6.25833	6.57873	7.84357	7.58512	7.69447	7.93569	6.00743	6.12058	6.43465	6.3524
ENSGALG00010000424	4.44886	4.49248	4.13432	3.15421	2.36818	2.36818	3.08366	3.80759	4.2254	2.91642	3.54014	3.3817	2.96741	3.10226	3.388
ENSGALG00010000426	3.30352	3.46747	2.36818	3.46686	2.36818	2.36818	2.36818	2.36818	2.9634	2.36818	2.36818	2.36818	2.36818	2.36818	2.36818
ENSGALG00010000427	5.48988	5.04927	5.41019	4.54354	3.19006	4.12801	4.70903	5.30049	5.83542	5.4231	4.9221	4.93989	3.54258	4.51193	4.22999
ENSGALG00010000428	7.84821	7.51712	9.6871	8.60885	8.22605	8.0495	8.31607	7.32933	8.07948	7.93598	7.70124	8.76046	8.14062	8.37158	8.23626
ENSGALG00010000429	4.3395	5.305	4.47626	3.97238	3.75681	3.42463	3.08366	4.33372	4.2254	4.02051	4.05664	3.77479	2.36818	3.94737	2.96504
ENSGALG00010000431	3.44225	3.32572	3.65355	6.00237	4.51944	4.81733	4.46461	4.85474	4.29767	4.69472	3.9855	5.17529	4.44297	4.96936	6.3682
ENSGALG00010000432	9.10421	9.01973	9.7099	9.72049	10.085	10.4237	9.84772	9.0092	9.58985	9.4021	9.2402	10.6715	10.0758	10.0654	9.74825
ENSGALG00010000433	3.30352	2.36818	3.0266	3.69886	2.36818	3.64872	3.75932	3.22162	3.20418	4.02051	2.36818	4.29153	3.54258	2.36818	3.53812
ENSGALG00010000434	8.09354	7.7138	8.34589	8.82668	8.27499	8.64228	8.68208	7.95054	8.15363	8.46281	8.38107	8.89929	8.82056	8.92757	8.60848
ENSGALG00010000435	5.25135	5.68609	5.88537	6.37592	5.46432	6.23066	5.43993	5.81644	6.04608	6.51615	5.70814	5.94622	5.63068	5.5432	6.53141
ENSGALG00010000436	5.90855	5.66365	4.80599	6.95419	6.84671	7.11828	5.91721	5.63753	5.41552	5.76435	5.60412	8.01361	7.88331	7.26265	6.1106
ENSGALG00010000440	4.73065	4.82044	3.49004	5.8123	5.07177	6.46227	6.19907	4.26041	4.43087	5.28806	4.18736	5.63248	4.44297	5.74235	5.97237
ENSGALG00010000441	5.51404	6.58137	6.06227	7.73365	7.38206	7.19163	6.91012	6.03829	5.90196	6.26935	5.99743	7.32322	7.21329	6.66634	7.51709
ENSGALG00010000442	8.84221	8.96856	9.17529	9.55108	8.78897	9.29186	9.14868	8.92888	9.27603	9.22423	8.64247	9.09759	8.80607	8.95165	9.26939
ENSGALG00010000443	8.68828	8.49574	8.72369	7.84139	7.56382	7.00889	6.59822	8.55006	9.01029	8.88515	8.20924	6.91013	6.99529	6.50164	6.66521
ENSGALG00010000444	8.75234	8.42816	8.7496	9.10913	9.1628	8.99312	9.21626	8.71243	8.43582	8.73226	8.68599	9.32063	9.61593	8.97141	9.0082
ENSGALG00010000445	3.66965	3.97323	2.36818	2.36818	2.36818	2.36818	2.36818	2.36818	2.36818	3.30684	3.12136	2.36818	2.36818	2.36818	2.36818
ENSGALG00010000446	4.39535	2.36818	3.65355	3.46686	3.19006	3.83221	2.36818	4.18253	4.06671	5.28806	4.41345	3.09206	2.36818	4.20483	2.36818
ENSGALG00010000447	3.13622	4.54462	3.29159	3.32518	2.36818	3.64872	2.36818	3.55874	4.14864	3.44602	4.24782	3.3817	3.39194	3.94737	3.66794
ENSGALG00010000448	2.36818	2.36818	2.36818	2.36818	2.36818	3.12336	2.36818	2.36818	2.36818	3.13898	2.90375	2.36818	2.96741	2.36818	2.96504
ENSGALG00010000449	10.51	10.864	10.7686	8.92788	8.92804	9.05724	8.64986	10.4869	10.8754	11.4213	10.7801	8.8791	8.66865	8.73288	8.56474
ENSGALG00010000450	6.09514	6.96488	8.22972	7.27309	7.04811	8.15585	6.79673	6.24805	6.29683	6.94598	7.43316	7.94531	6.80984	7.04087	7.67739
ENSGALG00010000452	8.83276	8.41492	9.16707	6.84979	6.88931	6.94243	6.39031	8.2877	9.05933	8.90346	9.09964	6.30392	5.89664	6.43465	6.4447
ENSGALG00010000453	3.13622	3.59031	3.0266	5.21326	4.51944	4.56511	5.94804	3.80759	3.38526	2.91642	3.28561	5.59291	4.50497	4.20483	6.1106
ENSGALG00010000454	2.36818	4.32209	3.29159	3.69886	4.26834	4.2523	3.91005	2.36818	3.53501	2.36818	3.12136	3.09206	2.36818	3.79355	3.98283
ENSGALG00010000456	3.30352	3.79854	3.49004	3.15421	2.36818	3.12336	3.91005	3.55874	2.9634	3.13898	3.90973	2.36818	3.20974	3.10226	3.53812
ENSGALG00010000457	9.65963	9.47518	9.56111	8.48463	8.42707	8.44667	8.75748	9.72675	9.55949	9.69917	9.64609	8.66461	8.58284	8.73751	8.83778
ENSGALG00010000458	8.38948	8.3982	7.7688	8.67966	9.10985	8.86463	8.67752	8.13374	8.20684	8.66411	8.24733	8.98494	9.1765	8.85282	8.91215
ENSGALG00010000460	2.91444	3.46747	3.0266	2.92738	3.95331	2.36818	2.36818	3.22162	3.20418	3.13898	3.12136	3.09206	4.50497	3.39571	3.20646
ENSGALG00010000462	5.03265	4.59476	3.29159	4.54354	4.51944	4.56511	3.75932	4.46873	3.38526	4.45539	4.69196	4.57328	4.07714	4.96936	4.43584
ENSGALG00010000463	3.30352	2.36818	2.36818	2.36818	2.36818	2.36818	2.36818	2.36818	2.36818	2.36818	2.36818	2.36818	2.36818	2.36818	2.36818
ENSGALG00010000465	7.59215	8.15714	8.03878	8.54048	7.9924	8.22729	7.83255	7.93965	8.2455	8.40937	7.72598	7.74554	7.34756	8.40103	7.93171
ENSGALG00010000466	8.32689	8.57523	8.37947	8.41328	8.0309	8.14113	8.48217	7.96673	8.40958	8.27522	7.84823	8.06459	8.31043	8.06802	8.41742
ENSGALG00010000467	10.0707	10.6162	10.3275	10.2149	10.5812	10.7009	10.9277	10.1715	10.0623	10.4208	10.3315	10.324	10.0091	10.6427	10.1013
ENSGALG00010000468	5.60674	5.83391	5.29233	3.69886	3.75681	4.46906	4.0431	5.22943	4.85881	5.006	4.73316	4.48602	2.96741	4.59993	4.3024
ENSGALG00010000469	7.03035	6.54527	7.08701	3.15421	2.36818	2.36818	3.91005	7.66326	8.0555	7.12848	6.90951	2.36818	2.36818	2.36818	2.36818
ENSGALG00010000470	7.91693	8.18471	8.26608	8.05253	7.75999	7.64226	8.37359	8.17147	8.45793	8.16192	8.08086	8.22683	8.08888	8.181	8.17492
ENSGALG00010000471	6.32923	6.44432	6.21962	5.85241	6.3628	6.61964	6.65514	6.03829	6.26359	6.21149	5.82364	6.62914	6.91099	6.60677	6.8785
ENSGALG00010000472	2.36818	2.36818	2.36818	2.36818	2.36818	2.36818	2.36818	2.97599	2.36818	2.36818	2.36818	2.36818	2.36818	3.10226	2.36818
ENSGALG00010000474	2.36818	2.36818	3.29159	2.36818	2.36818	2.36818	2.36818	2.97599	2.9634	2.36818	2.36818	2.36818	2.36818	2.36818	2.36818
ENSGALG00010000475	8.8586	8.46716	8.71995	8.9669	8.67205	8.78166	8.98856	8.58892	9.21459	8.9416	8.48037	8.96591	8.84911	8.95562	9.04049
ENSGALG00010000476	8.24375	7.96158	8.04477	7.97806	8.56463	7.95165	7.63022	9.18317	8.11239	8.04721	7.66073	8.23321	8.16808	8.09711	8.09675
ENSGALG00010000477	4.28108	4.19425	3.29159	3.88844	3.19006	4.12801	4.46461	3.22162	3.77956	2.36818	2.90375	3.92692	3.39194	3.10226	4.55673
ENSGALG00010000478	3.13622	2.36818	3.29159	2.92738	3.95331	3.64872	3.08366	2.97599	2.36818	2.91642	2.90375	3.09206	3.67284	2.36818	3.66794
ENSGALG00010000479	9.25687	9.3276	9.362	9.63186	9.726	9.73814	9.85379	9.22413	8.77221	9.63353	9.82159	9.58779	9.05676	9.58039	9.91291
ENSGALG00010000480	2.36818	2.92771	2.36818	2.36818	2.36818	2.36818	2.36818	2.97599	2.36818	2.36818	2.36818	3.09206	2.36818	2.36818	2.36818
ENSGALG00010000481	2.36818	2.92771	2.36818	2.92738	2.36818	2.36818	2.36818	2.36818	2.36818	2.36818	2.36818	2.36818	2.36818	2.36818	2.36818
ENSGALG00010000483	6.04663	6.0215	5.88537	6.38955	5.46432	6.08367	5.82048	6.0176	6.24668	6.21149	5.62554	5.46705	4.50497	6.23899	5.39091
ENSGALG00010000484	2.36818	2.36818	2.36818	2.92738	2.36818	2.36818	2.36818	2.36818	3.20418	2.36818	3.28561	2.36818	3.20974	3.39571	2.36818
ENSGALG00010000485	10.9323	10.7275	10.418	9.85872	10.0075	9.77673	9.74251	10.4785	10.1544	10.4397	10.1013	10.0319	10.3238	9.78632	10.2134
ENSGALG00010000486	5.96191	5.79322	6.21962	5.18175	5.77064	5.09373	5.03752	5.63753	6.39214	5.98824	5.41985	4.93989	4.37784	5.03253	5.48178
ENSGALG00010000490	2.36818	2.36818	2.36818	2.36818	2.36818	2.36818	2.36818	2.36818	2.36818	2.36818	2.36818	2.36818	2.36818	2.36818	2.36818
ENSGALG00010000491	7.99952	7.48579	7.84634	8.33471	8.58418	8.37928	7.97318	7.87822	8.12627	7.96678	7.51497	8.40691	7.61046	8.21456	8.09675
ENSGALG00010000494	2.36818	2.36818	2.36818	3.15421	2.36818	2.36818	2.36818	2.36818	2.36818	2.91642	2.36818	2.36818	2.36818	2.36818	2.36818
ENSGALG00010000495	4.73065	4.73469	5.44737	5.0827	4.82372	3.83221	4.16268	4.64806	4.85881	4.85929	4.81193	4.57328	3.89304	4.51193	3.20646
ENSGALG00010000496	2.36818	4.125	3.0266	2.36818	2.36818	3.12336	2.36818	3.22162	3.77956	4.55642	3.82855	4.18175	2.96741	3.79355	2.96504
ENSGALG00010000498	6.03008	5.21454	6.10902	5.3037	4.51944	4.96251	4.91549	5.93169	6.34528	6.60856	5.64665	5.00263	5.30264	5.5432	4.76954
ENSGALG00010000500	3.8557	2.36818	3.29159	3.88844	2.36818	2.36818	3.58388	2.36818	3.20418	3.13898	2.36818	2.36818	2.36818	2.36818	3.78323
ENSGALG00010000501	7.25241	7.49211	7.90022	7.75481	7.85964	7.85571	7.058	7.21645	7.79666	8.03065	7.7837	7.50303	7.32332	7.65394	7.19366
ENSGALG00010000502	3.30352	3.32572	8.76056	10.1152	5.85959	6.64077	7.62075	10.0654	5.44577	3.77145	3.54014	9.6653	6.67568	6.50164	7.21125
ENSGALG00010000505	2.36818	2.92771	2.36818	2.92738	2.36818	2.36818	2.36818	2.36818	2.36818	2.36818	2.36818	2.36818	3.20974	2.36818	2.36818
ENSGALG00010000506	2.91444	2.36818	2.36818	2.92738	2.36818	2.36818	2.36818	2.36818	2.36818	2.36818	3.12136	2.36818	3.20974	2.36818	2.36818
ENSGALG00010000507	5.94435	7.2224	7.15514	5.70678	5.90206	5.84854	5.48295	5.69099	7.32107	6.69538	6.6126	5.06262	5.0449	4.76008	4.90953
ENSGALG00010000508	2.91444	2.36818	2.36818	2.36818	2.36818	3.42463	3.37016	2.97599	3.66453	3.13898	2.36818	2.36818	2.36818	2.36818	3.20646
ENSGALG00010000509	4.92711	9.76322	8.09183	14.9693	13.6261	12.4904	15.1513	4.46873	3.53501	3.86072	4.12376	14.3958	13.6545	10.3271	16.2259
ENSGALG00010000510	4.50023	3.59031	4.03167	3.97238	3.51578	3.98948	4.27158	3.4062	4.14864	3.86072	4.24782	3.09206	3.20974	3.61431	3.20646
ENSGALG00010000511	7.60887	8.37447	8.33126	6.72653	6.84671	6.81817	5.82048	8.48038	8.26236	8.11948	7.91432	6.00743	5.89664	5.70471	5.74822
ENSGALG00010000512	2.36818	2.36818	2.36818	2.36818	2.36818	2.36818	2.36818	2.36818	2.36818	2.36818	2.36818	2.36818	2.36818	2.36818	2.36818
ENSGALG00010000514	3.13622	5.59412	3.65355	11.8759	8.48368	11.7416	12.9409	3.55874	2.36818	2.91642	2.36818	11.9466	8.92885	4.83349	9.69464
ENSGALG00010000515	2.36818	2.36818	3.29159	4.1933	2.36818	2.36818	2.36818	4.01002	2.36818	2.36818	2.36818	3.92692	2.36818	2.36818	3.20646
ENSGALG00010000518	2.36818	2.36818	2.36818	2.36818	2.36818	3.42463	2.36818	2.36818	2.36818	2.36818	2.36818	2.36818	2.36818	2.36818	2.36818
ENSGALG00010000519	3.30352	2.36818	4.61815	5.96634	2.36818	4.2523	5.60465	6.46181	3.20418	2.36818	2.36818	5.81526	2.96741	2.36818	3.20646
ENSGALG00010000521	2.36818	2.92771	2.36818	2.92738	2.36818	2.36818	2.36818	2.36818	2.36818	2.36818	3.12136	2.36818	2.96741	3.39571	2.36818
ENSGALG00010000522	3.56255	3.59031	2.36818	3.15421	2.36818	3.42463	3.58388	2.97599	3.38526	3.86072	3.12136	3.59763	2.96741	3.10226	2.36818
ENSGALG00010000523	2.91444	4.05154	3.91923	2.36818	2.36818	2.36818	2.36818	2.36818	3.38526	2.91642	2.36818	2.36818	2.96741	2.36818	2.36818
ENSGALG00010000524	3.76668	3.15467	8.42152	8.53744	3.51578	5.52124	6.59822	9.33424	5.32065	2.36818	3.12136	8.49979	3.39194	3.79355	3.53812
ENSGALG00010000525	2.36818	4.49248	2.36818	3.15421	3.95331	2.36818	3.37016	2.36818	3.77956	3.5667	3.64546	4.87412	3.54258	3.39571	2.36818
ENSGALG00010000526	6.06298	6.03897	6.95306	7.43916	6.71075	6.41395	6.9561	6.89377	6.04608	6.59733	6.55839	7.14506	6.95376	7.32549	7.2795
ENSGALG00010000527	3.56255	3.59031	3.91923	3.58963	3.19006	3.64872	4.37175	3.80759	3.88354	3.67413	2.36818	3.3817	2.36818	2.36818	3.66794
ENSGALG00010000528	2.36818	2.36818	5.29233	7.26574	4.51944	3.42463	3.91005	5.93169	3.53501	2.36818	2.36818	7.29908	4.72724	4.08302	4.86446
ENSGALG00010000529	9.96767	9.97418	10.4249	10.6439	10.8197	10.7441	10.4348	9.86841	10.1224	10.0691	9.94048	10.9866	10.7951	10.7666	10.3866
ENSGALG00010000530	2.36818	2.36818	5.02159	6.02005	5.28184	3.12336	4.55124	5.66451	2.36818	2.36818	2.36818	5.27947	3.20974	3.61431	4.55673
ENSGALG00010000532	5.27996	4.49248	4.80599	3.88844	3.51578	3.64872	2.36818	4.46873	4.94739	5.52248	5.56026	2.36818	2.36818	2.36818	4.43584
ENSGALG00010000535	2.36818	2.36818	2.36818	2.36818	3.95331	2.36818	2.36818	2.97599	2.36818	2.36818	2.36818	2.36818	2.96741	2.36818	3.20646
ENSGALG00010000536	2.36818	2.92771	2.36818	2.36818	2.36818	2.36818	2.36818	2.36818	2.36818	2.91642	2.36818	2.36818	2.96741	2.36818	2.96504
ENSGALG00010000538	3.13622	2.36818	2.36818	2.92738	2.36818	2.36818	3.37016	2.36818	2.36818	2.36818	2.36818	2.36818	2.36818	2.36818	2.36818
ENSGALG00010000541	2.36818	2.36818	2.36818	5.14952	2.36818	2.36818	2.36818	2.36818	3.20418	3.67413	2.36818	2.36818	2.96741	2.36818	3.20646
ENSGALG00010000543	2.36818	2.36818	2.36818	3.15421	2.36818	3.12336	2.36818	2.36818	3.38526	2.36818	2.36818	2.36818	2.36818	2.36818	2.36818
ENSGALG00010000544	4.21979	3.32572	4.31686	3.69886	3.51578	3.98948	2.36818	2.97599	5.41552	5.006	4.46419	2.36818	2.96741	2.36818	3.78323
ENSGALG00010000546	3.44225	3.32572	3.49004	4.25883	3.95331	3.98948	5.03752	3.4062	3.20418	3.13898	3.64546	3.77479	2.96741	4.41755	3.98283
ENSGALG00010000547	3.30352	3.69959	3.49004	3.32518	3.75681	4.36529	3.08366	2.36818	5.28753	4.02051	4.24782	2.36818	2.96741	3.10226	2.96504
ENSGALG00010000548	2.36818	2.92771	2.36818	3.46686	2.36818	4.89186	2.36818	2.36818	5.96552	2.91642	2.90375	3.77479	2.36818	2.36818	2.36818
ENSGALG00010000549	2.36818	2.92771	3.29159	3.58963	2.36818	3.42463	2.36818	2.36818	3.66453	2.36818	2.36818	2.36818	2.36818	2.36818	4.61322
ENSGALG00010000551	2.36818	2.36818	2.36818	2.36818	3.19006	2.36818	2.36818	2.36818	2.36818	2.36818	2.36818	3.09206	3.54258	3.94737	2.36818
ENSGALG00010000552	2.36818	2.36818	2.36818	2.92738	2.36818	4.12801	2.36818	2.36818	2.9634	2.36818	2.36818	2.36818	2.36818	2.36818	2.96504
ENSGALG00010000553	5.51404	5.18303	5.48359	5.87204	4.62881	4.96251	5.68031	5.49426	5.35299	4.93462	5.58236	5.32878	5.49098	4.41755	6.18396
ENSGALG00010000554	2.36818	3.15467	4.80599	4.49142	3.51578	4.2523	2.36818	4.80598	6.43752	4.93462	4.36061	2.36818	2.96741	2.36818	4.07099
ENSGALG00010000555	8.92681	8.82333	9.20502	10.1485	10.2933	10.258	9.95522	8.90108	8.98513	9.22605	9.37923	10.112	9.70453	10.2835	9.85684
ENSGALG00010000556	2.36818	2.36818	2.36818	4.1933	2.36818	3.42463	2.36818	2.36818	2.9634	4.65021	3.64546	2.36818	2.36818	2.36818	3.88744
ENSGALG00010000557	2.36818	2.36818	2.36818	2.36818	2.36818	2.36818	2.36818	3.22162	2.36818	3.44602	3.82855	2.36818	2.36818	2.36818	2.96504
ENSGALG00010000558	2.36818	2.92771	2.36818	3.15421	2.36818	2.36818	2.36818	2.36818	3.20418	2.36818	2.36818	2.36818	2.36818	2.36818	2.96504
ENSGALG00010000559	2.36818	2.92771	2.36818	4.05065	3.19006	2.36818	2.36818	2.36818	4.36601	2.36818	3.12136	2.36818	2.36818	2.36818	3.78323
ENSGALG00010000560	2.91444	3.15467	3.0266	3.79776	2.36818	5.69434	2.36818	2.36818	6.31316	2.91642	3.12136	2.36818	2.96741	2.36818	5.15261
ENSGALG00010000561	8.95757	8.50201	9.31816	10.3373	10.5714	10.6063	10.3166	9.19695	9.35081	9.1399	9.24876	10.2347	9.47466	10.2089	9.92759
ENSGALG00010000562	2.91444	3.46747	3.0266	4.12408	2.36818	3.42463	2.36818	2.97599	2.9634	3.30684	2.36818	3.77479	4.15947	3.39571	3.53812
ENSGALG00010000563	2.36818	2.36818	3.0266	4.43712	2.36818	2.36818	2.36818	2.36818	3.66453	2.91642	3.64546	2.36818	2.36818	3.10226	4.66739
ENSGALG00010000564	8.95322	8.7114	9.32063	9.83782	9.75216	10.1334	9.71607	8.85835	9.48608	9.21143	9.20192	9.9355	9.49648	9.70602	9.70397
ENSGALG00010000565	3.44225	2.92771	2.36818	3.15421	3.19006	2.36818	3.37016	2.36818	2.9634	2.91642	2.36818	2.36818	2.96741	3.10226	2.96504
ENSGALG00010000566	2.91444	3.32572	2.36818	3.15421	2.36818	3.42463	3.08366	2.97599	2.36818	3.13898	2.90375	2.36818	2.36818	3.10226	2.36818
ENSGALG00010000567	4.44886	3.97323	4.91805	5.18175	4.26834	3.98948	3.91005	3.80759	4.55155	4.97078	4.69196	3.92692	3.54258	3.39571	4.22999
ENSGALG00010000569	5.77566	6.75989	6.01393	5.46869	5.72398	5.81153	4.55124	5.69099	5.76561	5.68111	6.07696	4.805	4.96145	5.25971	5.22497
ENSGALG00010000572	2.36818	2.36818	2.36818	2.36818	2.36818	2.36818	2.36818	2.97599	2.36818	2.36818	2.36818	2.36818	2.96741	2.36818	2.36818
ENSGALG00010000573	3.13622	3.69959	3.79447	3.79776	3.51578	3.64872	4.55124	2.36818	2.36818	3.5667	4.12376	4.18175	4.07714	3.10226	3.78323
ENSGALG00010000574	8.62398	8.04989	8.9576	6.56792	6.2689	6.61964	5.25323	8.60279	9.5798	8.94602	8.74284	5.94622	6.00282	6.60677	6.20172
ENSGALG00010000575	6.408	8.40156	8.41691	7.28041	8.05912	7.44052	8.23768	5.66451	6.80349	6.58601	7.97337	6.62914	6.15777	7.05578	5.88691
ENSGALG00010000576	4.8127	4.38145	4.31686	4.64195	4.99399	5.47442	5.64299	4.7028	5.18319	4.82	4.84966	5.46705	5.19799	4.51193	6.12929
ENSGALG00010000577	6.6322	6.56944	6.94024	7.33763	6.30089	7.10316	7.00066	6.3671	7.04699	7.66793	6.82027	6.84487	6.54178	7.11392	6.93253
ENSGALG00010000578	4.89003	4.97717	5.02159	5.3037	5.40609	5.52124	4.37175	4.99133	4.85881	4.60415	5.08797	5.1201	4.96145	5.09292	4.15308
ENSGALG00010000579	4.7723	3.88926	4.86318	4.89987	2.36818	4.12801	4.91549	5.03398	5.96552	2.91642	2.36818	4.805	3.78851	4.59993	4.61322
ENSGALG00010000580	3.8557	3.97323	4.03167	4.25883	3.95331	2.36818	3.58388	4.403	5.10898	3.5667	2.36818	3.3817	2.96741	3.94737	3.53812
ENSGALG00010000581	9.04815	9.08804	9.45715	9.60155	9.48737	9.33776	9.26266	9.0528	9.57475	9.30045	9.12961	9.5803	9.28498	9.5333	9.39187
ENSGALG00010000582	2.36818	2.36818	2.36818	2.36818	2.36818	2.36818	2.36818	2.36818	2.36818	3.13898	2.36818	2.36818	2.36818	2.36818	2.36818
ENSGALG00010000583	9.35585	8.84323	9.02582	8.96009	8.81126	8.87801	9.07432	8.84382	9.02518	9.20222	8.92692	9.08706	8.04511	8.86132	8.64448
ENSGALG00010000584	8.6645	8.61629	9.11108	9.20441	8.88666	9.12238	8.89346	8.49533	8.96211	9.19666	8.87257	9.02959	9.15151	9.02535	9.01071
ENSGALG00010000585	9.73892	9.90368	10.0373	10.3796	9.69038	10.1665	9.79607	9.28347	10.3184	9.97598	9.26573	9.4522	9.40521	9.51456	10.4637
ENSGALG00010000586	7.5809	6.92802	8.00843	4.86017	5.46432	5.69434	4.63249	7.29553	8.67487	8.18455	7.95675	5.42246	6.1393	5.36072	5.51081
ENSGALG00010000587	4.28108	3.88926	4.9708	4.59366	4.12108	3.98948	3.08366	4.85474	4.71401	4.02051	4.51303	4.65509	3.67284	5.15078	3.88744
ENSGALG00010000588	16.0623	16.2092	16.7918	15.9443	15.8049	15.7765	15.6553	15.7888	17.283	15.9668	16.0002	15.8415	15.8079	15.6564	15.7957
ENSGALG00010000589	6.61019	6.89974	7.28241	7.5762	6.9709	6.87274	6.65514	6.05869	7.27194	7.87698	7.10348	6.74105	6.98502	7.4435	6.9846
ENSGALG00010000590	3.44225	3.59031	3.49004	3.58963	3.19006	3.42463	3.37016	4.46873	3.38526	3.44602	4.24782	3.09206	2.96741	4.08302	4.37086
ENSGALG00010000591	3.8557	4.05154	2.36818	2.36818	2.36818	2.36818	2.36818	3.4062	2.36818	3.13898	3.12136	2.36818	2.36818	2.36818	2.36818
ENSGALG00010000592	10.7097	10.7046	10.9033	11.4313	11.9789	11.5192	11.478	10.8777	11.0062	10.7375	10.9623	11.9388	12.1083	11.5671	11.4226
ENSGALG00010000593	6.31567	7.88203	7.648	5.33258	6.09725	4.73844	5.91721	6.35068	6.80349	5.59266	5.08797	5.46705	5.85185	5.74235	5.69881
ENSGALG00010000595	9.59402	9.72082	9.51439	11.1985	11.7786	11.6888	11.321	9.55722	9.43868	9.73026	9.56616	11.7161	11.9173	11.8153	11.3477
ENSGALG00010000596	2.36818	2.92771	2.36818	2.36818	2.36818	2.36818	2.36818	2.97599	2.36818	2.91642	2.90375	3.3817	2.96741	3.10226	2.96504
ENSGALG00010000598	2.36818	2.92771	3.0266	3.15421	2.36818	2.36818	4.0431	3.4062	3.38526	2.91642	2.36818	4.18175	3.98872	2.36818	2.96504
ENSGALG00010000599	9.73892	9.76973	8.91244	10.3329	12.1542	12.3902	11.2682	8.16213	8.69362	9.96839	8.38418	11.7758	11.5325	11.6356	10.8495
ENSGALG00010000601	2.36818	2.36818	2.36818	3.58963	2.36818	2.36818	3.75932	2.36818	2.9634	3.13898	2.36818	3.3817	2.36818	2.36818	2.36818
ENSGALG00010000602	2.36818	2.92771	2.36818	3.15421	2.36818	2.36818	3.08366	3.4062	2.36818	2.36818	2.36818	3.3817	3.20974	3.39571	2.36818
ENSGALG00010000603	8.42136	8.47993	8.55345	8.72589	9.25917	9.24445	8.99957	8.52478	8.30772	8.15811	8.25755	9.82583	9.46177	9.18283	8.95968
ENSGALG00010000604	3.13622	3.32572	2.36818	2.92738	3.75681	2.36818	4.97787	3.9133	3.66453	3.13898	2.36818	3.92692	4.23658	3.10226	3.20646
ENSGALG00010000606	5.90855	6.89974	6.26156	7.58803	6.66241	6.92532	7.01521	5.5241	6.56563	6.5515	6.94371	6.84487	7.33144	7.69258	7.37617
ENSGALG00010000607	2.36818	2.36818	2.36818	3.32518	2.36818	2.36818	2.36818	2.36818	2.36818	3.13898	3.64546	3.59763	3.20974	2.36818	2.96504
ENSGALG00010000609	2.36818	2.36818	2.36818	2.36818	2.36818	3.12336	2.36818	2.36818	2.9634	3.13898	2.36818	2.36818	2.36818	2.36818	2.36818
ENSGALG00010000610	8.28592	8.6978	8.64306	8.31705	7.98261	8.56719	8.33357	8.33002	8.27487	8.64248	8.36226	8.37265	7.96387	8.51854	8.46578
ENSGALG00010000612	3.44225	2.36818	2.36818	3.32518	3.19006	3.42463	3.58388	2.36818	2.36818	3.13898	3.28561	2.36818	3.20974	2.36818	3.20646
ENSGALG00010000613	6.93625	6.36365	7.22018	7.76527	6.30089	7.32797	7.08583	6.82429	7.23823	7.60777	7.2541	7.07568	6.72593	7.31314	6.62636
ENSGALG00010000614	8.97486	8.68407	8.44889	8.01796	8.38311	7.85571	8.56352	7.95596	8.27902	9.17045	8.53178	8.36686	8.49522	7.6637	7.55199
ENSGALG00010000615	2.36818	2.36818	2.36818	3.58963	2.36818	2.36818	3.08366	2.97599	2.9634	3.13898	2.36818	3.09206	3.54258	2.36818	2.96504
ENSGALG00010000616	6.42072	6.1715	6.57577	6.7688	6.93069	6.38916	6.89445	6.39937	6.83769	6.5631	6.20982	7.0614	6.82144	6.21253	6.3524
ENSGALG00010000618	4.64325	2.92771	4.80599	2.92738	3.51578	3.12336	2.36818	3.69057	5.47538	3.5667	3.42189	2.36818	2.96741	2.36818	2.36818
ENSGALG00010000619	7.34847	8.03698	8.65877	8.36597	7.42608	8.32821	7.74804	7.47986	8.83551	8.56122	8.31085	7.71851	7.83271	7.15603	8.16594
ENSGALG00010000620	5.03265	3.79854	4.47626	2.36818	3.51578	3.12336	2.36818	4.18253	5.64103	3.44602	4.24782	2.36818	2.36818	2.36818	3.53812
ENSGALG00010000621	4.15531	5.68609	5.91203	7.01688	7.24128	7.70368	7.04388	5.86367	6.70809	6.58601	7.9229	7.28686	6.93253	6.74211	6.86744
ENSGALG00010000623	6.11095	6.34976	6.26156	6.44282	6.2689	7.041	6.29788	7.64325	6.49588	6.73689	6.58032	6.60961	6.48451	5.9494	6.58644
ENSGALG00010000625	8.74983	7.70294	10.0433	5.96634	5.72398	5.37583	4.46461	8.10478	10.6917	8.74501	8.60295	5.78055	4.44297	5.74235	5.62128
ENSGALG00010000626	3.13622	3.15467	3.29159	3.69886	3.51578	4.12801	3.91005	2.36818	2.36818	2.36818	4.46419	2.36818	2.36818	3.39571	3.20646
ENSGALG00010000627	5.25135	5.15078	4.86318	5.77103	5.21529	6.46227	4.70903	5.36811	4.98961	5.8042	5.76706	5.17529	5.0449	5.03253	5.90876
ENSGALG00010000628	2.36818	2.92771	2.36818	2.36818	3.51578	2.36818	2.36818	2.36818	2.36818	2.36818	2.36818	2.36818	2.36818	2.36818	2.96504
ENSGALG00010000629	5.83414	5.21454	6.28208	3.88844	4.26834	3.83221	2.36818	4.80598	6.82638	5.52248	5.56026	3.09206	3.78851	2.36818	3.53812
ENSGALG00010000630	5.62899	5.81371	5.6198	5.33258	5.52022	6.33825	5.43993	5.74251	5.44577	5.8992	6.45532	5.55219	5.73326	4.68241	6.76393
ENSGALG00010000633	2.36818	3.69959	2.36818	3.15421	2.36818	3.98948	3.08366	3.69057	2.36818	3.13898	2.36818	2.36818	3.20974	2.36818	2.96504
ENSGALG00010000634	7.0951	7.06162	6.90109	6.86935	6.82492	7.30171	6.43437	7.50225	7.22107	7.12066	6.66484	7.21125	6.66284	7.0996	6.73988
ENSGALG00010000635	5.44028	4.68966	5.02159	5.61631	5.57398	5.8846	5.3497	4.85474	4.90382	4.60415	4.05664	6.37514	6.19402	5.15078	5.7723
ENSGALG00010000636	5.90855	6.63958	6.77677	6.21672	5.72398	5.52124	5.68031	6.56493	6.83769	6.4799	6.84763	5.27947	5.57645	6.34016	6.32026
ENSGALG00010000639	8.41187	8.66742	9.15605	7.61142	7.48277	7.5781	7.15315	8.23522	9.14132	8.55255	7.8706	7.78082	6.93253	7.30068	7.34467
ENSGALG00010000641	6.57652	7.42762	7.26197	8.42652	10.6164	10.3711	9.13876	6.31728	6.37669	6.41737	7.21265	10.7973	9.85991	10.5784	8.03397
ENSGALG00010000642	2.36818	3.32572	2.36818	3.15421	2.36818	2.36818	3.75932	2.36818	3.38526	2.36818	2.36818	2.36818	2.36818	2.36818	2.36818
ENSGALG00010000643	6.64308	7.00966	6.83335	6.68297	6.75752	6.5543	6.39031	6.3671	6.26359	7.12066	7.00976	6.20309	5.82891	6.76044	6.964
ENSGALG00010000645	2.36818	2.36818	2.36818	2.36818	2.36818	2.36818	2.36818	2.36818	2.36818	2.36818	2.36818	2.36818	2.36818	2.36818	3.53812
ENSGALG00010000646	6.59905	5.96777	6.95306	7.26574	5.77064	6.90801	5.20238	6.63429	7.55806	6.58601	7.07292	7.38186	6.17601	6.21253	5.7723
ENSGALG00010000647	3.66965	3.79854	4.13432	3.32518	4.12108	3.83221	4.27158	3.4062	4.71401	3.13898	2.90375	4.29153	4.50497	3.61431	3.53812
ENSGALG00010000648	2.36818	3.15467	2.36818	2.36818	3.19006	2.36818	2.36818	2.36818	2.36818	2.91642	2.36818	3.09206	2.36818	2.36818	2.36818
ENSGALG00010000649	8.1132	7.8231	8.02672	8.07793	8.10496	7.79116	8.25002	7.88391	8.06033	7.66256	8.08851	8.04296	8.17261	7.91308	7.92107
ENSGALG00010000650	9.07845	8.79807	9.6404	8.54048	8.61618	8.74805	8.44509	8.56431	9.80207	8.9416	9.19662	8.77365	8.71282	8.68101	8.85464
ENSGALG00010000651	9.27617	10.0994	10.8623	8.9916	8.97321	10.3066	9.54139	8.98821	9.62121	10.8772	8.66311	9.25004	9.18325	9.94066	9.68682
ENSGALG00010000652	9.66096	10.1542	9.89039	9.66992	10.1009	8.90875	9.63843	9.5175	8.43953	9.70961	9.86008	9.63431	9.10964	8.59189	9.28813
ENSGALG00010000653	8.32352	8.32578	8.82115	9.21016	9.72013	9.41013	9.21311	8.30477	8.2455	8.22878	8.7645	9.77865	10.0685	9.30313	9.11001
ENSGALG00010000654	8.15552	8.15316	8.18702	8.89254	8.36815	8.17766	8.31019	8.38324	8.71826	8.5954	8.63204	8.35521	8.62968	8.57131	8.46212
ENSGALG00010000655	2.36818	2.36818	2.36818	2.36818	3.19006	3.12336	2.36818	3.22162	2.9634	2.36818	2.36818	3.09206	2.36818	2.36818	2.36818
ENSGALG00010000656	5.13064	5.96777	5.68327	4.77709	5.28184	5.37583	4.37175	5.26541	5.03056	5.70238	5.64665	4.29153	4.44297	5.31113	4.43584
ENSGALG00010000657	5.38885	5.11777	4.47626	4.73355	4.91152	3.64872	4.85012	5.07535	4.71401	4.16114	5.49181	5.1201	3.39194	5.70471	5.11497
ENSGALG00010000658	5.13064	4.73469	6.19817	6.50673	5.81581	6.25833	4.91549	5.84025	6.26359	6.87342	6.18135	4.18175	3.67284	5.98115	4.07099
ENSGALG00010000659	2.36818	4.38145	2.36818	3.79776	5.07177	2.36818	3.75932	2.36818	2.36818	2.36818	2.90375	3.09206	2.36818	2.36818	2.36818
ENSGALG00010000660	7.73096	7.02719	7.45443	7.26574	7.9924	7.76259	7.02961	7.18909	7.15032	7.92258	7.23352	8.11383	7.15037	7.95341	7.42971
ENSGALG00010000661	3.44225	2.36818	3.0266	3.15421	3.19006	2.36818	2.36818	3.55874	3.66453	3.13898	2.90375	3.3817	3.20974	3.94737	2.96504
ENSGALG00010000662	4.08723	3.79854	5.33273	5.33258	5.14539	3.12336	4.55124	3.22162	4.98961	4.77952	5.05636	2.36818	2.36818	4.51193	2.36818
ENSGALG00010000663	5.16182	5.85382	3.79447	7.70677	8.9075	9.09209	8.31019	5.49426	5.32065	5.20028	6.01369	9.36196	7.99487	7.94543	8.3196
ENSGALG00010000664	2.36818	2.92771	2.36818	3.15421	2.36818	2.36818	3.37016	2.36818	2.36818	2.91642	2.36818	2.36818	2.36818	4.31567	2.36818
ENSGALG00010000665	2.36818	2.36818	2.36818	2.36818	2.36818	2.36818	2.36818	2.36818	2.9634	2.36818	2.36818	3.09206	2.36818	2.36818	2.36818
ENSGALG00010000666	4.50023	4.25981	4.54913	4.32109	5.52022	5.26976	4.37175	4.9473	4.49261	5.16974	4.9221	4.57328	3.98872	4.20483	4.3024
ENSGALG00010000668	5.4653	5.87346	5.20783	4.54354	5.77064	5.26976	4.91549	5.03398	5.14658	5.13851	5.62554	4.73215	4.37784	5.09292	5.35927
ENSGALG00010000670	2.36818	3.15467	2.36818	2.36818	2.36818	2.36818	2.36818	2.97599	2.36818	2.36818	2.36818	2.36818	2.36818	2.36818	2.96504
ENSGALG00010000672	4.28108	3.15467	4.68375	4.43712	4.72982	4.12801	4.63249	3.4062	3.88354	5.07385	4.41345	4.57328	3.89304	3.79355	3.88744
ENSGALG00010000673	6.26011	7.47307	6.1764	9.48778	10.9857	11.1221	10.6373	6.66113	6.467	6.88269	7.4089	11.01	9.86969	10.0301	10.1646
ENSGALG00010000674	8.74732	8.2936	8.16518	8.28834	9.18857	8.02565	8.02437	8.53928	8.19372	8.05132	8.1773	8.41255	8.22149	7.84612	8.39069
ENSGALG00010000675	2.91444	2.36818	2.36818	2.36818	3.19006	2.36818	2.36818	2.36818	2.9634	2.36818	2.36818	2.36818	2.96741	2.36818	2.36818
ENSGALG00010000676	2.36818	2.36818	2.36818	2.36818	2.36818	2.36818	2.36818	2.36818	2.36818	2.36818	2.36818	2.36818	2.36818	2.36818	2.36818
ENSGALG00010000677	2.36818	2.36818	2.36818	2.92738	2.36818	2.36818	2.36818	2.36818	3.20418	2.36818	3.12136	2.36818	2.36818	3.10226	2.36818
ENSGALG00010000680	3.56255	2.92771	3.29159	2.92738	3.51578	2.36818	3.08366	2.97599	4.2254	2.36818	2.36818	3.09206	2.36818	3.94737	3.20646
ENSGALG00010000681	2.36818	2.36818	2.36818	3.15421	2.36818	2.36818	2.36818	2.36818	2.36818	2.36818	3.12136	3.09206	2.36818	2.36818	2.36818
ENSGALG00010000682	2.36818	3.46747	2.36818	3.15421	2.36818	3.42463	2.36818	2.36818	2.9634	2.36818	2.36818	3.09206	2.96741	3.10226	3.20646
ENSGALG00010000683	2.36818	2.36818	2.36818	2.92738	2.36818	3.64872	2.36818	3.22162	2.36818	2.36818	2.90375	2.36818	2.36818	2.36818	2.36818
ENSGALG00010000684	8.73722	8.67854	9.32309	7.41277	6.61239	6.97604	7.5019	8.91226	9.30479	8.56984	8.27106	6.30392	7.28199	5.5432	7.95796
ENSGALG00010000685	3.13622	2.92771	2.36818	4.89987	5.07177	4.96251	4.0431	3.4062	3.20418	2.36818	2.36818	3.92692	3.98872	4.51193	4.66739
ENSGALG00010000686	6.32923	6.50824	6.08584	6.67187	7.4547	6.43831	7.13994	6.64777	5.78927	7.02345	6.19565	7.54468	6.46983	6.62691	6.59987
ENSGALG00010000687	6.96253	7.21477	6.28208	3.79776	4.40004	5.56655	4.55124	7.19827	5.88012	7.12848	6.90951	4.39248	4.50497	5.40861	5.03645
ENSGALG00010000688	3.56255	4.19425	5.55334	5.33258	5.62577	6.05237	5.14958	5.58196	6.10364	6.63076	5.515	5.88225	5.00381	5.03253	5.25977
ENSGALG00010000689	3.93813	4.32209	4.39904	5.24406	7.44047	7.21995	5.82048	3.80759	3.53501	4.16114	4.30548	7.34697	6.49905	7.08514	4.66739
ENSGALG00010000690	2.91444	3.15467	2.36818	2.36818	2.36818	2.36818	3.58388	2.36818	2.36818	2.36818	3.12136	2.36818	2.36818	2.36818	3.53812
ENSGALG00010000691	2.36818	2.36818	3.29159	2.36818	2.36818	2.36818	2.36818	2.36818	2.36818	2.36818	2.36818	2.36818	2.36818	2.36818	3.20646
ENSGALG00010000692	4.54966	4.77825	5.29233	5.46869	5.46432	5.3238	5.25323	4.90181	5.28753	5.56965	5.39502	5.67098	5.00381	5.36072	5.22497
ENSGALG00010000693	7.49956	7.79782	7.60808	8.18307	7.74849	7.48786	8.08762	7.861	8.16712	8.06359	7.98162	7.49243	8.21272	8.08264	7.7271
ENSGALG00010000694	7.52327	7.50467	7.5333	8.03102	7.4966	7.14807	7.16625	7.88391	8.26236	7.82509	8.06543	6.94168	7.04557	7.02581	7.36051
ENSGALG00010000695	6.27421	6.27816	6.13184	6.10531	5.77064	5.9541	6.12021	6.19383	6.68322	6.44271	6.06141	5.94622	6.22937	5.66603	6.32026
ENSGALG00010000696	8.69612	8.53909	8.83505	9.17727	8.53145	8.47629	8.86967	8.98821	9.33298	8.99379	9.20369	8.79105	8.65254	8.97533	8.79183
ENSGALG00010000697	6.79714	5.38995	5.68327	7.43261	6.91015	4.56511	5.5247	5.55333	7.27194	7.12848	5.66744	8.64081	5.82891	4.96936	6.86744
ENSGALG00010000698	6.09514	5.44384	7.98992	6.33423	7.15668	6.41395	7.79934	5.97529	7.23823	6.71628	5.76706	6.25439	7.80382	6.18558	8.30331
ENSGALG00010000699	6.14205	5.33389	7.70967	6.54375	7.12139	6.74202	7.83255	6.03829	7.39176	6.59733	6.07696	6.91013	7.84411	6.83151	8.40603
ENSGALG00010000700	2.36818	2.36818	3.29159	2.36818	3.51578	2.36818	2.36818	2.36818	2.36818	2.36818	2.36818	2.36818	3.78851	2.36818	3.78323
ENSGALG00010000701	5.6509	4.93965	5.33273	4.1933	5.14539	5.09373	4.16268	5.30049	5.53279	5.49828	4.60553	5.1201	4.56415	5.09292	5.35927
ENSGALG00010000702	4.08723	5.44384	4.68375	3.32518	3.19006	3.12336	2.36818	4.64806	3.77956	3.44602	3.90973	2.36818	2.96741	2.36818	2.96504
ENSGALG00010000703	3.56255	2.36818	4.03167	3.15421	2.36818	4.46906	3.37016	3.69057	4.29767	3.13898	4.18736	3.59763	3.67284	4.31567	5.25977
ENSGALG00010000704	7.93912	7.58964	7.84634	7.83147	8.19248	7.97674	7.60161	7.4026	8.2455	8.17705	7.87945	8.31368	8.03022	7.80264	7.999
ENSGALG00010000705	2.36818	4.97717	2.36818	2.36818	2.36818	2.36818	2.36818	2.97599	2.36818	2.36818	2.36818	2.36818	2.96741	2.36818	2.36818
ENSGALG00010000706	8.7448	7.61303	8.94163	8.75241	7.4547	7.85571	8.31019	8.35072	9.83342	8.65604	9.08251	7.59511	8.46602	7.36192	8.45477
ENSGALG00010000707	8.49211	7.97066	8.88932	8.62329	7.78274	8.09605	8.21268	8.15273	9.69444	8.5409	8.79988	7.72757	7.97945	7.86316	8.42873
ENSGALG00010000710	5.48988	4.59476	4.13432	5.94797	6.58671	4.46906	5.20238	5.63753	5.61474	5.54626	4.84966	6.42073	5.54853	4.20483	5.88691
ENSGALG00010000711	9.04201	8.55124	8.59487	7.64012	7.42608	6.43831	7.33806	8.47662	8.64947	8.79243	8.42101	7.19826	7.05542	7.34988	7.21996
ENSGALG00010000713	2.36818	2.36818	2.36818	2.36818	2.36818	2.36818	2.36818	2.36818	2.36818	2.36818	2.36818	2.36818	2.96741	2.36818	2.36818
ENSGALG00010000714	8.02464	7.85286	7.90022	7.98255	7.62804	7.79116	8.14822	7.93417	7.91333	7.69447	7.73576	7.67229	7.70101	8.14664	7.39936
ENSGALG00010000715	5.6509	5.24535	4.80599	6.96332	5.85959	5.61044	6.74525	6.49203	5.50437	5.72334	4.81193	5.32878	5.26862	5.70471	7.63896
ENSGALG00010000717	10.4786	10.4855	10.4623	10.5593	11.1234	10.9877	10.5339	10.706	10.292	10.7138	10.7006	10.9289	10.5123	10.8068	10.5299
ENSGALG00010000718	11.9527	11.7089	11.7392	12.6161	12.7522	12.8544	12.4432	11.591	12.0822	12.2867	12.2634	13.1323	12.52	12.7585	12.4721
ENSGALG00010000719	2.36818	2.36818	2.36818	2.36818	2.36818	2.36818	2.36818	2.36818	3.20418	2.91642	2.36818	2.36818	2.36818	2.36818	2.96504
ENSGALG00010000720	10.3935	10.3821	10.3567	10.4248	10.961	10.6103	10.5465	10.2453	10.291	10.148	10.1441	10.9101	10.9677	10.7519	10.421
ENSGALG00010000721	3.93813	4.64306	3.29159	4.64195	5.28184	3.64872	4.0431	3.9133	4.66204	4.77952	4.30548	4.39248	4.62078	4.20483	4.81783
ENSGALG00010000722	8.7821	9.06068	8.77144	10.1772	10.4183	11.0589	11.1063	8.84673	8.52231	8.85255	9.2072	10.7658	9.9536	10.6141	10.1825
ENSGALG00010000724	8.94447	8.74087	8.65877	8.50972	8.00212	8.37299	8.52342	8.56785	9.1436	8.23603	8.58414	7.83217	8.47704	8.53458	8.17939
ENSGALG00010000725	2.36818	2.36818	3.0266	2.36818	2.36818	2.36818	3.08366	3.4062	3.88354	2.91642	3.64546	3.3817	2.36818	3.94737	2.96504
ENSGALG00010000726	2.36818	2.36818	2.36818	2.36818	2.36818	2.36818	2.36818	2.36818	2.9634	2.36818	2.36818	2.36818	2.36818	2.36818	2.96504
ENSGALG00010000727	5.36242	6.07327	5.372	5.49439	6.23618	4.56511	5.03752	4.7028	5.21885	5.82372	5.23599	5.59291	6.12058	5.58534	4.81783
ENSGALG00010000728	8.29627	8.41492	8.0626	8.17525	8.9178	8.34757	8.08073	8.16213	7.71328	8.33376	7.63483	8.07883	7.38707	7.32549	7.36051
ENSGALG00010000729	6.89136	6.86116	6.68748	7.69587	8.49749	8.2203	7.94309	7.41839	6.67062	6.82613	6.6126	8.34935	8.67185	7.8716	7.6837
ENSGALG00010000730	8.35358	7.68099	8.41228	8.9115	8.8814	8.35397	8.08073	8.07024	8.58394	8.76517	7.72107	9.47391	8.04511	8.09711	8.7889
ENSGALG00010000731	2.36818	2.36818	2.36818	4.38042	3.51578	2.36818	2.36818	3.80759	2.36818	2.91642	2.90375	3.77479	3.39194	2.36818	2.36818
ENSGALG00010000732	6.34267	6.61658	6.34194	7.6458	7.68952	7.53369	7.26692	6.3671	6.86005	6.53981	6.81103	7.28686	7.15953	7.91308	7.23722
ENSGALG00010000733	3.13622	2.36818	2.36818	2.36818	2.36818	2.36818	2.36818	2.36818	2.36818	3.13898	2.36818	2.36818	2.36818	3.10226	3.20646
ENSGALG00010000734	3.30352	2.92771	3.0266	5.96634	4.62881	5.3238	5.43993	4.01002	2.36818	3.5667	3.12136	4.87412	4.30919	4.31567	5.62128
ENSGALG00010000735	2.36818	3.15467	2.36818	2.36818	2.36818	3.42463	2.36818	2.97599	3.20418	2.91642	3.42189	2.36818	3.20974	2.36818	3.20646
ENSGALG00010000736	2.36818	2.92771	3.49004	3.15421	4.26834	3.64872	2.36818	2.36818	3.20418	2.91642	3.54014	3.3817	2.96741	6.15811	2.96504
ENSGALG00010000738	2.36818	2.92771	2.36818	3.15421	3.19006	2.36818	2.36818	2.97599	2.9634	3.13898	2.90375	3.3817	2.36818	3.79355	3.20646
ENSGALG00010000739	2.36818	4.49248	2.36818	2.92738	3.19006	2.36818	2.36818	2.36818	3.38526	3.13898	2.36818	4.29153	3.67284	3.10226	2.96504
ENSGALG00010000740	2.36818	4.54462	3.0266	2.92738	3.19006	3.42463	2.36818	3.80759	3.53501	4.09288	2.36818	4.65509	3.54258	4.31567	2.36818
ENSGALG00010000741	8.20764	8.94112	8.02672	7.28768	6.53393	7.53369	6.72768	8.3466	8.56369	8.65063	8.33999	6.66742	6.75041	6.72354	7.6837
ENSGALG00010000742	3.44225	3.88926	3.29159	2.92738	3.19006	3.42463	2.36818	2.36818	3.20418	3.30684	3.28561	2.36818	3.78851	2.36818	2.96504
ENSGALG00010000743	3.44225	3.97323	3.49004	3.15421	2.36818	4.36529	2.36818	3.4062	2.9634	3.13898	4.24782	3.09206	3.20974	4.31567	2.96504
ENSGALG00010000746	2.36818	2.36818	2.36818	2.36818	2.36818	2.36818	2.36818	2.36818	2.36818	3.44602	2.36818	2.36818	2.36818	3.10226	2.36818
ENSGALG00010000747	2.36818	2.36818	2.36818	2.36818	2.36818	2.36818	2.36818	2.36818	2.36818	3.44602	2.90375	2.36818	3.20974	3.39571	2.96504
ENSGALG00010000749	3.56255	4.43816	3.65355	3.97238	5.21529	3.42463	4.46461	3.9133	3.97873	4.45539	3.42189	4.48602	3.39194	4.08302	3.66794
ENSGALG00010000752	2.36818	2.36818	2.36818	2.36818	2.36818	2.36818	2.36818	2.36818	2.36818	2.36818	2.36818	3.77479	2.36818	2.36818	3.78323
ENSGALG00010000753	11.5778	11.1361	11.79	10.3736	10.7054	10.4964	10.6303	11.3558	11.3025	11.25	11.0749	10.7005	11.0164	10.4715	10.6754
ENSGALG00010000754	2.91444	2.36818	2.36818	2.36818	3.19006	2.36818	2.36818	2.36818	2.36818	2.36818	2.36818	3.3817	2.36818	2.36818	3.388
ENSGALG00010000755	2.36818	2.36818	2.36818	2.36818	3.19006	2.36818	2.36818	2.36818	2.9634	2.36818	2.36818	2.36818	2.96741	2.36818	2.36818
ENSGALG00010000757	10.7857	10.6597	10.5021	11.9379	12.3936	13.2653	12.5169	10.2497	9.98831	10.9149	10.9556	12.352	12.3454	12.3421	12.5047
ENSGALG00010000760	3.13622	3.79854	3.65355	2.36818	2.36818	2.36818	2.36818	3.4062	2.9634	3.13898	3.82855	2.36818	2.36818	2.36818	3.20646
ENSGALG00010000761	2.36818	2.92771	2.36818	3.15421	3.19006	2.36818	2.36818	2.36818	3.77956	3.13898	2.36818	4.57328	2.36818	2.36818	4.22999
ENSGALG00010000762	2.91444	4.05154	4.03167	3.15421	3.19006	3.42463	3.08366	3.4062	3.38526	2.91642	3.64546	2.36818	2.36818	2.36818	3.66794
ENSGALG00010000763	7.80535	7.0701	7.68685	8.54353	8.19248	7.62119	7.75672	7.1612	7.4881	7.75118	6.99353	9.61246	7.41792	6.64676	8.02902
ENSGALG00010000764	5.62899	5.3622	2.36818	4.68853	4.82372	2.36818	2.36818	2.36818	4.85881	5.10656	2.36818	7.67229	2.36818	3.10226	5.74822
ENSGALG00010000765	4.8127	5.15078	3.0266	4.86017	5.40609	3.64872	4.0431	3.22162	3.77956	4.77952	4.36061	4.18175	3.39194	5.88368	5.11497
ENSGALG00010000766	4.39535	4.97717	3.65355	4.43712	4.51944	3.12336	2.36818	2.36818	3.97873	4.65021	4.41345	4.65509	4.07714	5.70471	4.81783
ENSGALG00010000767	2.36818	2.36818	3.0266	2.36818	3.51578	2.36818	2.36818	2.36818	2.9634	2.91642	3.42189	2.36818	2.96741	5.5432	3.20646
ENSGALG00010000768	4.15531	3.97323	4.91805	3.69886	4.40004	2.36818	4.16268	2.97599	3.38526	3.5667	3.9855	2.36818	3.20974	2.36818	4.3024
ENSGALG00010000769	2.36818	2.36818	2.36818	2.92738	3.75681	2.36818	3.08366	2.36818	3.53501	3.13898	3.28561	3.09206	3.78851	4.31567	2.36818
ENSGALG00010000770	2.36818	2.36818	2.36818	2.36818	2.36818	4.2523	3.91005	2.97599	2.36818	2.91642	3.12136	3.09206	2.36818	4.31567	3.20646
ENSGALG00010000771	5.30799	5.81371	3.49004	6.21672	6.2689	4.6546	4.85012	4.01002	5.10898	6.24072	5.74769	5.27947	6.06292	7.31314	5.84217
ENSGALG00010000772	3.44225	2.36818	2.36818	2.92738	3.51578	3.12336	3.08366	3.22162	3.88354	4.82	3.12136	4.29153	2.36818	3.61431	2.96504
ENSGALG00010000773	2.36818	2.36818	2.36818	2.92738	4.26834	3.42463	2.36818	2.97599	2.36818	3.67413	3.12136	2.36818	3.39194	5.31113	2.96504
ENSGALG00010000775	2.36818	2.36818	2.36818	2.36818	2.36818	2.36818	2.36818	2.36818	2.36818	3.13898	2.90375	3.3817	3.39194	2.36818	2.36818
ENSGALG00010000776	2.36818	3.69959	3.0266	2.92738	3.19006	2.36818	3.58388	2.97599	2.9634	2.91642	2.36818	3.09206	3.20974	3.10226	3.20646
ENSGALG00010000777	12.3149	11.9355	11.9301	11.7477	11.6109	11.6556	11.7686	11.9473	11.7	12.0722	11.9079	11.5739	11.8845	11.5852	11.8507
ENSGALG00010000778	3.13622	3.15467	3.49004	2.36818	3.19006	2.36818	3.37016	2.36818	2.9634	2.91642	2.36818	2.36818	3.20974	3.61431	3.388
ENSGALG00010000779	2.91444	3.15467	2.36818	2.92738	3.51578	3.42463	2.36818	2.36818	2.36818	3.67413	2.90375	2.36818	3.20974	3.61431	2.36818
ENSGALG00010000782	2.36818	3.46747	2.36818	2.36818	2.36818	2.36818	2.36818	2.36818	2.36818	2.36818	2.36818	3.09206	2.96741	2.36818	3.388
ENSGALG00010000783	11.2305	11.7318	11.1982	10.2053	10.0362	10.1899	10.1958	11.5428	10.9974	11.7145	11.5893	9.6747	9.72931	9.72943	10.135
ENSGALG00010000784	9.7134	9.66462	9.51439	8.77587	8.70218	9.08057	8.79164	9.36306	9.02764	9.51503	8.9793	8.58704	8.62968	8.89068	9.08404
ENSGALG00010000785	8.71167	9.03927	8.566	9.71781	10.2532	10.2733	9.70042	8.57139	8.35563	8.78998	8.92692	9.96454	9.61093	9.70602	9.92759
ENSGALG00010000786	3.13622	4.19425	4.31686	3.32518	3.19006	3.12336	2.36818	4.64806	4.43087	4.09288	3.12136	2.36818	2.36818	3.39571	3.78323
ENSGALG00010000787	7.407	7.46666	7.54181	6.89819	7.19112	7.14807	6.87862	6.68747	7.53743	7.47323	7.15546	7.11771	6.97467	7.59397	7.01496
ENSGALG00010000788	10.1632	10.1896	9.98844	9.80019	10.1099	10.0492	10.1554	10.2441	10.0862	10.2436	10.1964	10.2058	9.82871	10.0376	9.54687
ENSGALG00010000789	5.51404	5.11777	5.65189	6.56792	6.56056	7.49945	6.47712	5.11551	5.41552	5.65951	5.20762	6.44299	5.87442	6.10153	6.39929
ENSGALG00010000790	10.0413	10.3302	9.90857	9.85872	10.3927	10.5819	10.3253	10.2364	9.63745	9.79297	9.84209	10.1796	10.194	10.2221	10.3051
ENSGALG00010000791	5.90855	5.72992	5.20783	3.69886	5.28184	4.89186	4.78143	6.85945	5.50437	5.23016	7.02581	5.1201	3.54258	4.31567	3.53812
ENSGALG00010000792	6.408	7.4984	6.06227	12.9545	13.5985	14.1014	13.4731	7.30406	4.49261	5.20028	6.19565	13.3533	13.4572	13.4712	13.1705
ENSGALG00010000793	10.31	12.2525	9.83443	16.1786	18.8255	19.2505	17.5533	6.477	5.88012	8.27522	10.4929	19.6721	18.3346	18.5109	16.3338
ENSGALG00010000794	2.36818	2.36818	2.36818	2.92738	2.36818	2.36818	3.37016	2.36818	2.36818	2.36818	2.36818	2.36818	2.36818	2.36818	2.36818
ENSGALG00010000795	6.408	6.77035	6.43644	6.17003	5.81581	6.3121	6.34484	7.11349	6.61908	7.09697	6.64417	5.63248	5.57645	6.1301	7.13959
ENSGALG00010000796	5.90855	5.81371	6.03831	5.33258	6.06029	5.09373	5.91721	6.46181	5.98609	6.37849	5.44425	5.22836	5.43097	5.03253	5.79597
ENSGALG00010000797	4.39535	4.125	3.79447	4.25883	4.62881	4.12801	4.16268	4.46873	2.9634	3.44602	5.68794	4.06115	3.20974	2.36818	4.15308
ENSGALG00010000798	4.21979	3.32572	3.0266	4.73355	3.19006	3.83221	3.58388	3.9133	2.9634	4.09288	3.74093	3.59763	2.96741	3.61431	4.15308
ENSGALG00010000799	6.56511	5.64086	5.80226	6.50673	4.99399	6.46227	6.19907	6.17529	5.32065	5.68111	5.20762	5.06262	5.16127	5.70471	6.25373
ENSGALG00010000800	11.2479	11.2251	11.3038	11.108	12.5571	11.7783	11.4061	10.9608	10.5158	11.2814	10.4198	12.2734	12.4371	12.0141	11.3728
ENSGALG00010000801	4.21979	5.0137	3.65355	5.6847	6.33218	5.42599	5.5247	5.4326	4.14864	4.55642	6.16689	5.59291	6.67568	5.9494	5.79597
ENSGALG00010000802	9.3309	10.0076	9.34268	9.61895	9.87096	9.9598	9.72714	9.88554	8.47249	9.75063	9.5003	9.6319	9.8244	9.87082	10.0363
ENSGALG00010000803	6.90949	7.44075	6.74762	7.63443	7.60269	7.71367	7.32644	7.37049	7.28024	7.21905	7.85274	7.15855	7.81545	7.48812	8.07292
ENSGALG00010000804	3.13622	3.15467	2.36818	3.58963	2.36818	3.12336	3.08366	2.36818	2.36818	2.36818	2.36818	3.59763	4.56415	4.31567	3.78323
ENSGALG00010000805	7.20919	7.31089	7.00323	7.35159	7.12139	6.41395	7.31474	6.3671	6.96689	7.19694	7.32712	6.81109	7.49226	7.04087	7.45205
ENSGALG00010000806	5.62899	6.43119	6.06227	5.63948	5.52022	5.42599	6.12021	5.11551	6.02636	6.18166	6.01369	5.88225	5.91852	5.66603	6.05299
ENSGALG00010000807	10.0206	10.7228	10.8088	11.419	11.4238	11.3686	11.008	9.78113	9.28018	10.8313	10.2374	11.9891	10.9421	11.7326	11.0217
ENSGALG00010000808	6.89136	7.17602	6.5078	7.25835	7.30555	7.3149	7.46	7.68951	6.39214	7.04838	6.87447	6.60961	6.71353	7.37386	7.76328
ENSGALG00010000810	8.50704	8.61629	8.72369	10.108	10.66	10.4283	10.1323	8.8898	8.75147	8.49637	9.27078	10.5232	10.4624	10.1143	9.87898
ENSGALG00010000811	2.91444	3.69959	2.36818	3.97238	2.36818	3.12336	4.16268	2.36818	2.9634	2.36818	2.36818	2.36818	2.96741	3.10226	3.88744
ENSGALG00010000812	9.19367	9.58709	9.37632	9.35391	9.25511	9.26496	9.4481	9.37119	9.37426	9.3613	9.39782	9.33256	9.10728	9.43708	9.7392
ENSGALG00010000813	7.20919	7.01845	7.74691	8.70432	9.42732	9.72586	8.63111	6.84783	6.61908	7.04838	7.75993	9.71627	8.91	9.45404	7.85555
ENSGALG00010000814	5.4148	5.08394	3.79447	3.79776	3.19006	4.36529	3.91005	5.15453	4.85881	3.94339	3.54014	3.3817	3.39194	3.61431	5.7723
ENSGALG00010000815	6.24588	6.21819	5.88537	7.34463	7.68952	7.47617	6.77977	6.57907	5.76561	6.52803	6.31836	7.69095	6.83294	7.22359	6.71542
ENSGALG00010000816	9.89007	9.62637	9.52514	8.71245	8.60346	8.90439	9.02132	9.55722	9.5646	9.43078	9.6794	8.6787	8.98396	8.647	8.96745
ENSGALG00010000817	10.0029	9.70867	10.235	10.7634	11.2714	11.4267	10.9989	10.0815	10.4694	10.3273	10.3443	11.469	10.4029	11.0464	10.4637
ENSGALG00010000818	5.87183	5.49574	5.74402	4.25883	5.14539	5.26976	5.25323	6.0176	6.08471	5.82372	5.82364	5.1201	6.0824	5.81478	5.62128
ENSGALG00010000819	2.36818	3.15467	2.36818	2.36818	2.36818	2.36818	3.08366	2.97599	2.36818	2.36818	3.42189	2.36818	2.36818	3.79355	2.36818
ENSGALG00010000820	10.7579	10.6646	10.7795	11.0493	11.5292	11.1655	11.026	10.3528	10.701	10.47	10.1973	11.345	11.8535	11.3465	11.2379
ENSGALG00010000821	9.72238	9.57969	10.2712	4.05065	2.36818	4.73844	4.37175	9.4672	9.28843	10.6481	10.1615	4.93989	4.56415	5.03253	4.81783
ENSGALG00010000822	9.85782	10.0489	10.0788	11.834	10.9421	11.4259	11.8119	10.9059	10.4963	9.96839	10.5008	11.0922	11.6669	11.6337	12.0358
ENSGALG00010000823	7.33513	7.19164	6.19817	7.11838	7.51029	7.10316	6.98596	7.35417	6.80349	6.19666	6.84763	6.7939	7.73202	7.21033	7.47406
ENSGALG00010000831	2.36818	2.36818	2.36818	2.36818	2.36818	2.36818	3.37016	2.36818	2.36818	2.91642	2.36818	2.36818	2.36818	2.36818	2.36818
ENSGALG00010000832	2.36818	2.36818	2.36818	2.36818	2.36818	2.36818	2.36818	2.36818	2.36818	2.36818	2.90375	2.36818	2.36818	2.36818	2.96504
ENSGALG00010000841	2.36818	3.32572	2.36818	3.15421	2.36818	2.36818	4.37175	2.36818	3.20418	2.91642	3.54014	4.18175	2.36818	3.10226	2.36818
ENSGALG00010000843	8.34363	8.58413	8.15413	8.32767	8.46271	8.29535	8.81259	8.51747	8.26654	8.0838	8.67332	8.76927	9.00948	8.93161	8.53018
ENSGALG00010000853	7.80051	8.75931	7.95216	6.03752	7.01003	6.57641	5.78672	7.63652	7.29671	8.88285	7.65043	7.0614	7.36349	8.11143	4.3024
ENSGALG00010000855	2.36818	2.36818	2.36818	2.36818	2.36818	2.36818	3.08366	2.36818	2.36818	2.36818	2.36818	2.36818	2.36818	2.36818	2.36818
ENSGALG00010000857	6.90045	9.60176	8.17067	7.41941	6.8028	4.73844	5.85346	6.90503	5.41552	9.03588	6.92671	4.93989	5.00381	6.47966	5.11497
ENSGALG00010000858	2.91444	2.36818	2.36818	2.92738	2.36818	2.36818	2.36818	2.36818	2.36818	2.36818	2.36818	2.36818	2.36818	2.36818	2.96504
ENSGALG00010000859	4.59728	5.96777	5.77344	6.66069	5.34535	5.02969	6.79673	6.71333	6.15897	6.08823	7.16273	6.37514	6.87806	6.84875	7.01496
ENSGALG00010000860	2.36818	3.46747	2.36818	2.36818	2.36818	2.36818	2.36818	2.36818	3.53501	2.91642	2.90375	2.36818	2.36818	2.36818	2.36818
ENSGALG00010000861	3.44225	3.69959	3.79447	3.32518	2.36818	4.6546	3.91005	4.7028	4.76403	4.02051	3.82855	3.92692	2.96741	3.39571	4.22999
ENSGALG00010000863	3.76668	6.1395	4.61815	4.05065	4.12108	2.36818	3.08366	4.53128	2.36818	5.52248	3.82855	3.09206	3.20974	3.61431	3.20646
ENSGALG00010000864	7.63086	7.64741	7.68685	7.87075	7.04811	7.49945	7.88888	8.15273	7.76743	7.55081	7.91862	7.00279	7.87777	7.81144	7.31245
ENSGALG00010000865	3.44225	3.32572	2.36818	3.46686	4.40004	2.36818	3.37016	2.97599	3.53501	3.86072	3.9855	2.36818	3.54258	3.39571	3.66794
ENSGALG00010000866	2.36818	2.36818	2.36818	2.36818	2.36818	3.12336	2.36818	2.36818	2.36818	2.36818	2.36818	3.09206	2.36818	2.36818	2.36818
ENSGALG00010000867	2.36818	2.36818	3.65355	2.36818	2.36818	2.36818	3.08366	2.36818	3.20418	2.36818	2.90375	2.36818	2.36818	2.36818	2.36818
ENSGALG00010000868	2.36818	2.36818	2.36818	2.36818	2.36818	2.36818	2.36818	2.36818	2.9634	2.36818	2.90375	2.36818	2.36818	2.36818	2.36818
ENSGALG00010000869	5.38885	4.59476	4.13432	2.92738	2.36818	2.36818	2.36818	3.4062	2.9634	3.67413	2.36818	2.36818	3.20974	3.10226	2.96504
ENSGALG00010000870	5.56115	5.21454	5.77344	6.83992	7.22475	6.46227	6.72768	5.55333	5.90196	5.68111	5.44425	7.0614	6.62361	6.96391	7.03485
ENSGALG00010000872	3.76668	2.92771	3.29159	2.36818	2.36818	2.36818	3.08366	2.97599	3.53501	2.91642	3.12136	2.36818	2.36818	2.36818	2.36818
ENSGALG00010000873	3.13622	3.97323	2.36818	2.92738	3.75681	2.36818	3.75932	2.36818	3.66453	2.91642	3.90973	3.3817	3.20974	2.36818	2.36818
ENSGALG00010000874	3.13622	2.92771	2.36818	3.79776	4.40004	3.12336	3.08366	2.36818	2.36818	2.91642	2.90375	3.3817	2.96741	2.36818	3.20646
ENSGALG00010000876	2.36818	2.36818	3.0266	2.36818	2.36818	2.36818	2.36818	3.4062	2.9634	3.13898	2.36818	2.36818	2.36818	2.36818	2.36818
ENSGALG00010000877	2.36818	2.36818	2.36818	2.36818	3.19006	3.42463	2.36818	2.36818	2.36818	3.13898	2.36818	2.36818	2.36818	3.10226	2.36818
ENSGALG00010000878	3.13622	2.36818	2.36818	2.36818	3.19006	3.42463	2.36818	2.36818	2.36818	2.36818	2.36818	3.09206	2.36818	2.36818	2.96504
ENSGALG00010000879	2.36818	2.36818	3.0266	3.15421	2.36818	2.36818	2.36818	2.36818	2.9634	2.36818	2.90375	2.36818	2.36818	2.36818	2.36818
ENSGALG00010000880	3.44225	2.92771	2.36818	2.36818	2.36818	2.36818	3.08366	2.97599	2.36818	2.36818	3.42189	2.36818	2.36818	2.36818	2.36818
ENSGALG00010000885	2.36818	2.36818	2.36818	2.36818	2.36818	2.36818	2.36818	2.36818	2.36818	2.36818	3.28561	2.36818	2.96741	2.36818	2.36818
ENSGALG00010000887	2.91444	2.36818	2.36818	2.36818	2.36818	2.36818	3.08366	2.97599	2.36818	2.36818	3.12136	2.36818	2.36818	2.36818	2.36818
ENSGALG00010000888	2.36818	2.36818	2.36818	3.15421	2.36818	2.36818	2.36818	2.36818	2.36818	2.36818	2.36818	2.36818	2.36818	2.36818	2.36818
ENSGALG00010000890	2.91444	2.36818	3.0266	2.36818	2.36818	2.36818	2.36818	2.36818	2.36818	2.36818	2.36818	2.36818	2.36818	2.36818	2.36818
ENSGALG00010000894	2.36818	2.36818	3.29159	2.36818	2.36818	3.12336	2.36818	2.97599	2.36818	2.91642	2.36818	2.36818	2.96741	2.36818	2.36818
ENSGALG00010000896	2.91444	2.36818	3.49004	2.36818	2.36818	2.36818	2.36818	3.55874	2.36818	2.36818	3.64546	2.36818	2.36818	2.36818	3.88744
ENSGALG00010000897	3.13622	2.36818	2.36818	2.36818	2.36818	2.36818	2.36818	2.36818	2.36818	2.36818	3.12136	2.36818	2.96741	2.36818	2.36818
ENSGALG00010000901	3.56255	4.32209	3.79447	4.25883	2.36818	2.36818	5.03752	4.7028	4.14864	3.86072	3.9855	3.59763	3.39194	4.59993	4.61322
ENSGALG00010000902	3.8557	2.36818	2.36818	2.36818	2.36818	2.36818	2.36818	2.36818	3.20418	2.36818	2.36818	2.36818	2.36818	2.36818	2.36818
ENSGALG00010000903	2.36818	2.36818	2.36818	2.92738	2.36818	3.12336	3.08366	2.36818	2.36818	2.36818	2.36818	2.36818	3.54258	3.39571	4.15308
ENSGALG00010000907	2.36818	2.36818	2.36818	2.36818	2.36818	2.36818	2.36818	2.36818	3.77956	2.36818	2.36818	2.36818	2.36818	2.36818	2.36818
ENSGALG00010000910	3.30352	2.36818	2.36818	3.32518	2.36818	2.36818	2.36818	2.36818	3.20418	2.91642	2.36818	2.36818	2.36818	2.36818	2.36818
ENSGALG00010000911	2.36818	2.36818	2.36818	3.15421	3.19006	3.98948	5.03752	2.36818	2.36818	3.5667	3.42189	3.3817	2.96741	2.36818	2.36818
ENSGALG00010000913	3.13622	4.32209	3.79447	3.15421	3.75681	3.83221	3.08366	3.69057	3.20418	4.28722	4.46419	3.59763	4.07714	3.61431	3.98283
ENSGALG00010000914	3.13622	3.15467	2.36818	2.36818	2.36818	3.12336	3.37016	2.36818	3.77956	2.36818	2.36818	3.09206	2.36818	2.36818	2.36818
ENSGALG00010000916	2.91444	3.59031	3.65355	2.36818	3.19006	2.36818	2.36818	3.4062	3.20418	2.36818	3.90973	2.36818	2.96741	2.36818	3.20646
ENSGALG00010000926	3.44225	4.125	4.22895	3.15421	2.36818	3.64872	4.16268	2.97599	3.77956	3.67413	5.02401	3.3817	2.36818	3.10226	3.66794
ENSGALG00010000930	2.36818	2.36818	2.36818	2.36818	2.36818	3.83221	2.36818	2.36818	2.36818	2.36818	2.36818	2.36818	2.36818	2.36818	2.36818
ENSGALG00010000932	2.36818	2.36818	2.36818	2.36818	2.36818	2.36818	2.36818	2.36818	2.36818	2.36818	2.36818	3.09206	2.96741	3.39571	2.96504
ENSGALG00010000933	2.36818	2.36818	2.36818	2.36818	2.36818	2.36818	2.36818	2.36818	2.36818	2.36818	2.36818	3.09206	2.36818	2.36818	3.20646
ENSGALG00010000935	4.50023	2.36818	5.07056	5.79182	5.72398	6.89048	2.36818	4.33372	2.36818	5.74399	5.17866	6.3518	2.36818	5.25971	5.86471
ENSGALG00010000936	2.36818	2.36818	3.0266	2.36818	2.36818	2.36818	2.36818	2.36818	3.53501	2.36818	2.36818	2.36818	2.36818	2.36818	2.36818
ENSGALG00010000938	2.91444	2.92771	2.36818	2.92738	2.36818	2.36818	2.36818	2.36818	2.36818	2.36818	3.42189	2.36818	2.96741	3.10226	2.36818
ENSGALG00010000939	2.91444	3.46747	3.0266	5.2742	3.19006	4.2523	4.16268	3.22162	2.36818	2.91642	2.90375	3.09206	3.89304	4.76008	4.49769
ENSGALG00010000940	2.36818	2.92771	2.36818	2.36818	2.36818	4.12801	2.36818	2.36818	2.36818	2.36818	2.36818	2.36818	2.96741	3.10226	2.36818
ENSGALG00010000941	2.36818	2.36818	2.36818	4.32109	3.19006	2.36818	3.75932	2.97599	2.36818	2.36818	2.36818	3.59763	4.15947	3.10226	4.3024
ENSGALG00010000943	2.36818	2.36818	2.36818	3.15421	2.36818	2.36818	2.36818	2.36818	2.36818	2.91642	2.36818	2.36818	2.36818	2.36818	2.36818
ENSGALG00010000946	2.36818	2.36818	2.36818	2.92738	2.36818	2.36818	2.36818	2.36818	2.36818	2.36818	2.36818	2.36818	2.36818	2.36818	2.96504
ENSGALG00010000948	2.36818	2.36818	2.36818	2.92738	2.36818	2.36818	2.36818	2.36818	2.36818	3.30684	2.36818	2.36818	2.36818	2.36818	2.36818
ENSGALG00010000949	2.36818	3.32572	2.36818	3.15421	3.19006	2.36818	3.08366	2.36818	2.36818	2.91642	2.36818	2.36818	2.96741	3.39571	3.20646
ENSGALG00010000950	2.36818	2.36818	2.36818	3.15421	2.36818	2.36818	2.36818	2.36818	2.36818	2.36818	2.36818	2.36818	2.96741	3.10226	2.36818
ENSGALG00010000954	2.36818	2.36818	2.36818	2.92738	4.12108	3.12336	2.36818	2.36818	2.36818	2.36818	2.36818	3.77479	2.36818	2.36818	2.36818
ENSGALG00010000955	4.15531	2.36818	3.29159	2.36818	2.36818	2.36818	2.36818	3.22162	2.9634	3.30684	2.36818	3.09206	2.36818	2.36818	2.36818
ENSGALG00010000956	2.91444	2.36818	2.36818	3.97238	5.28184	5.3238	3.91005	2.36818	2.36818	2.36818	2.36818	5.27947	5.0449	4.68241	4.07099
ENSGALG00010000957	2.36818	2.36818	2.36818	4.1933	4.40004	3.64872	3.75932	2.36818	2.36818	2.36818	2.36818	4.06115	4.82584	3.79355	2.36818
ENSGALG00010000958	2.91444	2.36818	2.36818	3.46686	4.26834	3.83221	4.0431	2.36818	2.36818	2.91642	2.36818	3.3817	4.07714	4.31567	3.20646
ENSGALG00010000959	4.28108	4.49248	3.29159	3.32518	2.36818	2.36818	2.36818	2.97599	3.77956	3.30684	3.42189	2.36818	2.36818	2.36818	2.96504
ENSGALG00010000960	2.36818	2.36818	2.36818	2.36818	2.36818	2.36818	2.36818	2.36818	2.36818	2.36818	2.90375	2.36818	2.36818	3.10226	2.36818
ENSGALG00010000961	2.91444	2.36818	2.36818	2.92738	2.36818	2.36818	2.36818	2.36818	2.36818	2.36818	2.36818	2.36818	2.36818	2.36818	2.96504
ENSGALG00010000962	3.44225	3.59031	2.36818	2.36818	3.19006	3.12336	2.36818	3.22162	3.38526	3.30684	2.36818	2.36818	2.96741	2.36818	2.36818
ENSGALG00010000963	3.56255	3.46747	4.22895	3.88844	2.36818	2.36818	3.08366	3.22162	3.66453	3.13898	3.74093	3.77479	2.96741	3.39571	2.36818
ENSGALG00010000964	2.36818	2.36818	2.36818	3.15421	2.36818	2.36818	2.36818	2.36818	2.36818	2.36818	2.36818	3.3817	2.36818	2.36818	2.36818
ENSGALG00010000965	2.36818	3.46747	2.36818	2.92738	2.36818	2.36818	2.36818	2.36818	2.36818	2.36818	2.36818	2.36818	2.36818	2.36818	3.66794
ENSGALG00010000966	4.99836	6.10677	5.5189	5.94797	6.13327	6.25833	6.51863	4.99133	5.47538	5.63757	5.344	6.00743	5.12356	5.62626	5.7723
ENSGALG00010000971	6.04663	6.89019	5.83051	6.48151	6.78034	6.90801	6.77977	5.55333	6.6059	6.51615	6.35703	5.27947	5.63068	6.31553	5.90876
ENSGALG00010000978	2.36818	2.36818	2.36818	2.36818	2.36818	2.36818	3.08366	2.97599	2.36818	2.36818	2.36818	2.36818	2.96741	2.36818	2.36818
ENSGALG00010000982	2.36818	2.36818	2.36818	2.36818	2.36818	2.36818	2.36818	2.36818	2.36818	2.36818	3.54014	2.36818	2.36818	2.36818	2.36818
ENSGALG00010000983	2.36818	2.36818	2.36818	2.36818	2.36818	2.36818	2.36818	2.97599	2.36818	2.36818	2.36818	2.36818	2.36818	3.10226	2.36818
ENSGALG00010000985	2.36818	3.15467	2.36818	3.32518	2.36818	2.36818	2.36818	2.36818	2.36818	2.36818	2.36818	2.36818	2.36818	2.36818	2.36818
ENSGALG00010000989	2.36818	2.36818	2.36818	3.15421	2.36818	2.36818	3.37016	2.36818	2.36818	2.36818	2.36818	2.36818	2.36818	2.36818	2.96504
ENSGALG00010000997	2.36818	2.36818	2.36818	2.36818	2.36818	2.36818	2.36818	2.36818	2.36818	3.13898	2.90375	3.09206	2.36818	3.10226	2.96504
ENSGALG00010001001	2.36818	3.15467	3.65355	3.46686	3.19006	2.36818	3.37016	2.36818	2.36818	2.36818	2.36818	3.59763	2.96741	3.10226	3.98283
ENSGALG00010001005	2.36818	2.92771	3.0266	2.36818	2.36818	2.36818	2.36818	2.36818	4.55155	3.13898	2.36818	2.36818	2.36818	3.10226	2.36818
ENSGALG00010001007	2.36818	2.36818	2.36818	2.36818	2.36818	2.36818	2.36818	2.36818	2.36818	2.36818	2.36818	2.36818	2.36818	3.39571	2.36818
ENSGALG00010001009	2.36818	2.36818	2.36818	3.15421	2.36818	2.36818	2.36818	2.36818	2.36818	2.36818	2.36818	2.36818	2.36818	2.36818	2.36818
ENSGALG00010001013	3.8557	2.36818	2.36818	3.69886	3.19006	3.42463	2.36818	3.69057	3.20418	2.36818	3.12136	3.3817	2.36818	2.36818	3.20646
ENSGALG00010001014	2.91444	2.36818	3.0266	2.36818	2.36818	2.36818	2.36818	3.69057	2.9634	2.36818	2.36818	2.36818	2.36818	2.36818	2.36818
ENSGALG00010001017	2.36818	2.92771	2.36818	2.36818	2.36818	2.36818	2.36818	2.36818	2.36818	3.13898	2.90375	2.36818	2.36818	2.36818	2.36818
ENSGALG00010001018	2.36818	2.36818	2.36818	2.36818	2.36818	2.36818	2.36818	2.36818	2.36818	2.36818	3.12136	2.36818	2.36818	2.36818	2.36818
ENSGALG00010001020	2.36818	2.36818	2.36818	2.36818	2.36818	2.36818	2.36818	3.22162	2.36818	2.36818	2.36818	2.36818	2.36818	2.36818	2.96504
ENSGALG00010001024	2.36818	2.36818	2.36818	2.36818	2.36818	2.36818	2.36818	3.22162	2.36818	2.36818	2.36818	2.36818	3.20974	2.36818	4.43584
ENSGALG00010001025	2.36818	2.36818	2.36818	2.36818	2.36818	2.36818	3.75932	2.36818	2.36818	2.36818	2.36818	2.36818	2.36818	2.36818	3.53812
ENSGALG00010001026	2.36818	2.36818	3.0266	2.36818	2.36818	2.36818	2.36818	2.36818	2.36818	2.36818	2.36818	2.36818	2.36818	2.36818	4.90953
ENSGALG00010001027	2.91444	2.92771	2.36818	3.15421	3.19006	2.36818	2.36818	2.36818	2.36818	2.36818	2.36818	2.36818	2.36818	2.36818	2.36818
ENSGALG00010001033	2.36818	3.15467	2.36818	2.92738	2.36818	3.83221	4.46461	2.36818	2.36818	3.13898	2.36818	5.27947	2.36818	3.61431	2.96504
ENSGALG00010001034	2.36818	2.36818	2.36818	2.92738	2.36818	2.36818	2.36818	2.36818	2.36818	2.36818	2.36818	2.36818	2.36818	2.36818	3.53812
ENSGALG00010001035	2.36818	2.36818	2.36818	3.69886	2.36818	3.42463	3.37016	2.36818	2.36818	2.36818	2.36818	2.36818	2.36818	2.36818	3.88744
ENSGALG00010001037	2.36818	2.36818	2.36818	2.36818	2.36818	2.36818	2.36818	2.36818	2.36818	2.36818	2.36818	2.36818	2.96741	2.36818	2.36818
ENSGALG00010001040	2.36818	2.36818	2.36818	2.92738	2.36818	2.36818	2.36818	2.36818	2.36818	2.36818	2.36818	2.36818	2.36818	3.39571	3.66794
ENSGALG00010001049	2.36818	2.36818	2.36818	3.15421	2.36818	2.36818	2.36818	2.36818	2.36818	2.36818	2.36818	2.36818	2.36818	2.36818	2.96504
ENSGALG00010001050	2.36818	2.36818	2.36818	2.36818	2.36818	4.36529	2.36818	2.36818	2.36818	2.36818	2.36818	2.36818	2.36818	2.36818	2.36818
ENSGALG00010001052	2.36818	2.36818	2.36818	3.15421	2.36818	2.36818	3.91005	2.36818	2.36818	2.36818	2.36818	2.36818	2.36818	2.36818	2.96504
ENSGALG00010001053	2.36818	2.36818	2.36818	3.69886	4.40004	3.42463	4.37175	3.22162	2.36818	3.44602	2.90375	2.36818	3.39194	2.36818	2.36818
ENSGALG00010001055	4.92711	3.46747	3.29159	3.32518	2.36818	2.36818	2.36818	2.36818	2.9634	4.09288	3.82855	3.59763	2.36818	3.10226	2.36818
ENSGALG00010001056	2.91444	2.36818	2.36818	3.15421	2.36818	3.12336	2.36818	3.69057	2.36818	2.36818	2.36818	2.36818	2.36818	3.39571	2.96504
ENSGALG00010001057	3.30352	3.79854	5.11785	2.36818	2.36818	3.12336	3.08366	3.80759	2.36818	3.67413	3.9855	3.77479	4.30919	3.39571	3.20646
ENSGALG00010001058	4.73065	4.73469	4.13432	5.63948	5.34535	5.15493	5.3023	5.03398	4.90382	5.23016	4.36061	6.03708	5.0449	5.58534	5.6476
ENSGALG00010001059	4.8127	6.21819	6.19817	5.59276	5.57398	4.6546	5.39554	4.46873	5.3846	4.55642	5.49181	4.87412	4.62078	4.41755	4.99544
ENSGALG00010001064	2.36818	2.92771	2.36818	2.36818	2.36818	2.36818	2.36818	2.36818	2.36818	2.36818	2.90375	2.36818	2.36818	2.36818	2.36818
ENSGALG00010001065	5.09875	5.33389	4.91805	2.36818	2.36818	3.12336	3.75932	4.53128	5.14658	4.60415	5.344	3.59763	2.96741	4.41755	3.78323
ENSGALG00010001066	8.07763	8.05416	7.95216	8.26273	8.58418	8.45264	8.4926	8.33418	8.11239	8.14278	8.37169	7.86541	8.4916	8.20123	8.28269
ENSGALG00010001067	2.36818	2.36818	2.36818	2.92738	2.36818	2.36818	2.36818	2.97599	2.36818	2.36818	3.12136	3.09206	3.54258	2.36818	2.36818
ENSGALG00010001069	2.36818	2.92771	2.36818	2.36818	3.19006	2.36818	2.36818	2.36818	3.38526	2.36818	2.36818	3.09206	2.36818	2.36818	2.96504
ENSGALG00010001070	7.103	7.17602	7.4363	5.72853	5.57398	6.3121	6.29788	6.9708	6.70809	6.29743	6.41925	5.81526	5.96129	7.08514	6.7277
ENSGALG00010001071	2.36818	2.36818	2.36818	3.15421	4.26834	3.98948	3.75932	2.36818	2.36818	2.36818	3.82855	2.36818	2.36818	2.36818	2.36818
ENSGALG00010001075	3.13622	3.46747	3.29159	2.92738	3.51578	3.42463	3.58388	3.22162	2.9634	2.91642	2.36818	2.36818	2.36818	3.39571	4.37086
ENSGALG00010001077	2.36818	2.92771	2.36818	2.36818	3.19006	3.42463	3.37016	2.36818	2.36818	2.36818	2.36818	2.36818	2.36818	2.36818	2.36818
ENSGALG00010001078	2.36818	2.36818	3.29159	2.92738	2.36818	2.36818	2.36818	2.36818	2.36818	2.36818	2.36818	2.36818	2.36818	2.36818	2.36818
ENSGALG00010001080	2.36818	2.92771	2.36818	2.92738	2.36818	2.36818	2.36818	2.36818	2.36818	2.36818	2.36818	2.36818	2.36818	2.36818	3.53812
ENSGALG00010001081	3.44225	2.92771	3.0266	2.36818	2.36818	3.12336	2.36818	2.36818	3.88354	2.91642	3.42189	2.36818	2.36818	2.36818	2.96504
ENSGALG00010001082	9.25156	9.87255	9.66199	9.71511	8.77202	10.5447	9.44542	8.73465	9.91161	9.71221	9.13147	9.37066	8.659	9.39673	9.75276
ENSGALG00010001083	3.30352	2.92771	2.36818	4.68853	6.02235	5.15493	5.5247	2.36818	2.36818	2.91642	3.42189	5.63248	5.7819	5.03253	4.37086
ENSGALG00010001084	2.36818	2.36818	3.0266	3.32518	3.51578	3.12336	3.37016	2.36818	2.36818	2.36818	2.90375	3.3817	3.54258	3.10226	3.20646
ENSGALG00010001085	2.36818	3.69959	2.36818	2.92738	2.36818	2.36818	2.36818	3.22162	2.36818	3.13898	2.36818	2.36818	2.96741	2.36818	2.96504
ENSGALG00010001086	2.91444	3.15467	2.36818	2.36818	3.19006	2.36818	2.36818	2.97599	2.36818	2.36818	3.42189	2.36818	3.39194	2.36818	2.36818
ENSGALG00010001088	3.76668	3.15467	2.36818	4.93844	6.02235	4.46906	4.70903	3.80759	3.77956	3.13898	2.90375	5.00263	5.19799	4.59993	4.61322
ENSGALG00010001098	2.36818	3.15467	2.36818	2.36818	2.36818	2.36818	3.08366	2.36818	2.36818	2.36818	2.36818	2.36818	2.36818	2.36818	2.36818
ENSGALG00010001101	2.91444	3.59031	2.36818	3.15421	2.36818	4.46906	3.91005	3.22162	2.36818	3.13898	3.64546	4.65509	2.36818	2.36818	2.36818
ENSGALG00010001102	2.36818	2.36818	2.36818	2.36818	2.36818	2.36818	3.37016	2.36818	2.36818	2.36818	2.36818	2.36818	2.36818	2.36818	2.36818
ENSGALG00010001104	12.129	12.1791	12.2336	10.8757	10.6415	10.6354	10.9055	12.2622	12.2486	11.9927	12.0121	10.6213	10.9401	10.7891	11.0898
ENSGALG00010001105	2.36818	3.15467	2.36818	2.36818	2.36818	2.36818	2.36818	2.36818	2.36818	2.36818	2.36818	2.36818	2.36818	2.36818	2.36818
ENSGALG00010001107	6.07915	4.54462	3.65355	2.36818	2.36818	2.36818	2.36818	4.53128	5.44577	4.55642	5.14909	2.36818	2.36818	2.36818	2.36818
ENSGALG00010001108	3.30352	2.92771	2.36818	2.36818	2.36818	2.36818	2.36818	2.36818	3.20418	2.91642	3.42189	2.36818	2.36818	2.36818	2.36818
ENSGALG00010001111	6.6322	5.81371	6.62472	4.93844	4.72982	4.36529	5.09469	5.90937	6.06552	5.56965	7.32063	4.73215	5.39997	3.10226	5.97237
ENSGALG00010001112	9.39169	9.8308	9.67364	9.77454	10.2693	10.5093	10.0447	9.78113	9.34884	9.57192	9.19662	10.4402	10.0002	10.2254	9.53994
ENSGALG00010001113	7.48756	8.31157	7.09859	7.96904	7.0292	7.65268	8.23147	7.59546	7.20371	7.77624	7.50928	6.20309	5.85185	6.34016	8.27436
ENSGALG00010001114	8.59632	8.32224	8.66267	8.4429	8.44143	7.93468	7.83255	8.76581	8.69362	8.78258	8.09613	8.14799	8.68141	8.30459	8.5985
ENSGALG00010001115	11.4203	11.2726	11.4304	12.1798	12.474	12.0961	12.2518	11.5064	11.4291	11.2374	11.6302	12.2174	12.1582	12.1197	12.1146
ENSGALG00010001116	11.2533	11.2255	11.1504	10.9509	11.214	11.0957	11.1919	11.151	10.9112	11.1024	11.0039	11.1053	11.2881	11.0154	11.0525
ENSGALG00010001117	7.37478	7.19939	7.0517	5.8325	6.06029	6.1443	6.43437	7.90086	6.94615	7.89081	7.7931	4.06115	4.82584	5.31113	4.99544
ENSGALG00010001118	5.38885	5.08394	4.54913	3.58963	3.51578	4.2523	3.58388	5.90937	4.76403	5.37064	4.46419	3.3817	2.96741	3.39571	3.20646
ENSGALG00010001119	9.68611	9.67992	9.68327	9.68652	9.59405	9.39471	9.6076	9.47099	9.77444	9.5819	9.57844	9.52159	9.39943	9.47634	9.75126
ENSGALG00010001120	7.53498	8.11683	7.71719	8.82917	9.60046	9.34098	8.71361	7.19827	7.63776	7.78614	7.87503	9.64631	9.68407	9.25556	8.93082
ENSGALG00010001121	10.9597	11.068	10.8975	10.2469	10.5763	10.3961	10.5033	10.9439	10.6035	10.967	10.8374	10.5554	10.5786	10.5668	10.5857
ENSGALG00010001122	6.03008	6.03897	6.39938	4.59366	5.90206	5.81153	5.88569	7.26092	6.61908	5.97087	5.94748	6.20309	6.42486	5.70471	5.07627
ENSGALG00010001123	8.1706	8.42156	7.7688	8.09875	8.6902	8.48797	8.25002	7.97209	8.13087	7.8816	8.22668	8.79105	8.09366	7.91308	8.46212
ENSGALG00010001124	4.73065	4.97717	5.16357	4.32109	4.40004	4.81733	4.85012	5.5241	4.71401	4.77952	4.18736	3.77479	4.23658	3.61431	4.15308
ENSGALG00010001125	5.56115	4.25981	5.20783	5.24406	4.91152	4.89186	4.37175	5.15453	4.76403	5.44861	5.05636	5.27947	4.77745	4.96936	4.22999
ENSGALG00010001126	6.07915	5.33389	5.98913	5.46869	5.67573	5.37583	5.20238	5.36811	5.35299	6.13571	5.93044	4.65509	5.36827	4.68241	5.22497
ENSGALG00010001127	7.67386	7.91061	8.33126	8.24416	8.49749	8.05736	7.85696	8.4423	7.99123	7.94042	8.01413	8.34347	8.24317	7.90488	7.91572
ENSGALG00010001128	3.8557	3.46747	3.49004	2.92738	3.51578	2.36818	3.37016	3.22162	4.29767	3.67413	4.05664	3.59763	2.96741	3.10226	3.78323
ENSGALG00010001129	2.36818	3.32572	2.36818	5.14952	4.26834	6.85478	5.94804	2.36818	2.36818	2.91642	3.64546	3.92692	4.82584	3.39571	4.37086
ENSGALG00010001130	2.91444	3.15467	2.36818	2.36818	2.36818	2.36818	2.36818	2.36818	2.36818	2.36818	2.36818	2.36818	3.54258	2.36818	2.96504
ENSGALG00010001131	9.27268	9.10049	8.85904	8.92788	8.95331	8.97249	9.05687	9.04011	8.92819	8.79489	8.8022	8.95823	9.09302	8.87397	9.01572
ENSGALG00010001132	9.88779	9.74747	10.1091	10.1039	9.94338	9.97854	9.99241	9.99609	9.80063	9.64309	10.0226	9.89986	10.1175	9.88964	9.87072
ENSGALG00010001133	8.7448	8.94343	9.10536	9.36598	9.49083	9.39781	9.31645	8.76581	9.28843	8.90118	9.21071	9.49795	9.47832	9.28429	9.27775
ENSGALG00010001134	3.13622	2.36818	3.49004	3.97238	3.19006	3.42463	3.08366	4.53128	2.9634	2.36818	3.54014	3.09206	3.67284	3.10226	4.61322
ENSGALG00010001135	9.65293	9.59738	9.41383	8.50972	8.72584	8.49956	8.31607	9.7963	9.8751	9.51503	9.44178	8.25218	8.87711	8.61217	8.64448
ENSGALG00010001136	10.4755	10.5922	10.8332	10.9019	11.0597	11.0667	10.7338	10.6857	10.801	10.9483	11.0682	10.9435	10.3115	10.6611	10.6214
ENSGALG00010001137	2.91444	2.92771	2.36818	3.58963	3.19006	3.42463	3.08366	2.36818	2.36818	2.36818	2.36818	3.09206	2.96741	2.36818	3.388
ENSGALG00010001138	10.3536	10.4791	10.6713	10.1101	9.13215	8.59445	9.95711	10.3311	10.2021	10.1784	10.3013	9.31462	9.20108	6.84875	10.0811
ENSGALG00010001140	8.51297	8.37447	8.42612	8.73656	8.9382	8.56167	8.95504	8.6768	8.50825	8.29268	8.47746	9.35904	9.10017	9.36421	8.89595
ENSGALG00010001141	8.9179	8.84323	8.54924	8.59719	8.46973	8.42252	8.93989	8.83209	8.58394	8.76015	8.888	8.54664	9.22524	9.04414	8.66693
ENSGALG00010001142	8.27898	8.03698	8.24542	6.27668	7.20803	6.38916	6.79673	8.03485	7.95021	7.89996	7.60845	7.00279	7.31514	7.36192	6.7277
ENSGALG00010001143	6.03008	6.83152	6.60859	7.04294	5.07177	6.38916	6.87862	6.57907	6.5101	6.9371	7.39044	4.57328	5.26862	6.64676	6.77581
ENSGALG00010001144	7.0386	6.44432	6.84716	6.30574	6.9906	6.36393	6.53895	6.55064	7.51649	6.88269	5.82364	6.1225	5.89664	4.83349	6.71542
ENSGALG00010001145	6.47048	7.32513	5.48359	6.74782	9.60366	6.33825	6.51863	5.71699	6.2803	5.93549	7.15546	9.05862	9.47282	8.4749	6.05299
ENSGALG00010001146	8.05341	8.51447	8.7162	6.82997	5.72398	7.27497	5.14958	7.80207	7.96057	8.18829	7.7837	6.30392	6.87806	6.38819	7.08341
ENSGALG00010001147	7.82456	7.8231	7.73954	7.55826	7.83808	7.93468	7.71281	7.88958	7.21241	7.65718	7.47464	7.7895	7.82123	7.64412	7.62592
ENSGALG00010001149	11.0399	10.9583	11.184	8.54353	8.41256	9.19543	8.95504	10.9024	10.872	10.4256	10.4616	8.36105	8.37469	7.3857	8.90677
ENSGALG00010001150	7.00529	7.75116	7.02767	9.65875	11.3256	11.2494	10.3413	6.57907	5.44577	5.70238	6.13754	11.5932	11.1278	11.6974	9.59616
ENSGALG00010001151	5.73528	5.44384	5.6198	4.86017	5.07177	5.42599	4.70903	5.71699	6.10364	6.26935	6.19565	4.73215	5.7819	4.96936	5.81926
ENSGALG00010001152	9.30037	9.10256	9.09095	8.78618	9.94085	9.61573	9.6617	9.04774	8.24126	8.92825	8.64247	10.0998	9.90139	9.89999	9.38609
ENSGALG00010001153	7.87609	7.35318	8.03276	7.09367	7.94277	7.27497	7.74804	7.78391	7.76743	7.87234	7.83009	6.44299	7.84978	6.93194	7.57253
ENSGALG00010001154	8.6645	8.81328	8.61916	8.41328	8.36815	7.77218	8.56352	8.60968	8.61051	8.48121	8.70353	8.23321	8.05004	8.35361	8.60848
ENSGALG00010001155	10.4253	10.7612	10.783	10.3081	10.47	10.0958	10.2429	10.4557	10.7828	10.3666	10.4689	10.1763	10.1918	10.5219	10.2918
ENSGALG00010001156	10.5667	10.4743	10.3924	11.2215	11.857	11.5199	11.3203	10.6636	10.4035	10.5743	10.6881	11.8336	11.1938	11.6962	11.18
ENSGALG00010001157	7.90795	7.76166	7.63217	8.15948	7.8489	7.7817	7.64899	7.76552	8.22845	8.28572	7.77898	7.75444	8.26876	8.20123	7.75132
ENSGALG00010001158	7.30808	6.93732	7.59996	7.19781	7.24128	6.46227	7.30293	6.72609	7.61168	7.14397	7.30099	7.35869	7.10368	6.96391	6.92188
ENSGALG00010001159	6.55362	7.08691	6.64067	6.50673	4.72982	5.56655	6.32155	7.17986	6.94615	6.9371	7.40277	6.09459	6.93253	6.43465	6.67793
ENSGALG00010001160	9.04201	9.13117	9.3132	9.1436	8.53815	8.94309	9.13544	8.88697	9.43868	9.09282	9.13701	8.89929	8.94481	8.76495	8.69528
ENSGALG00010001161	11.3363	11.1286	11.2255	10.0842	10.3572	9.74788	9.96461	11.0772	11.0918	10.9853	11.0304	9.95106	9.74763	9.41993	9.88446
ENSGALG00010001162	4.73065	6.18723	5.96389	4.68853	4.12108	5.09373	4.63249	5.26541	5.78927	5.76435	5.44425	4.29153	3.67284	3.94737	4.95316
ENSGALG00010001163	5.30799	6.21819	6.26156	5.87204	6.9906	4.46906	4.46461	5.71699	5.58795	5.86196	6.38224	4.39248	4.87257	3.39571	5.53925
ENSGALG00010001164	11.3363	11.7154	11.4909	11.1942	11.4883	11.3726	11.4767	11.5018	11.4389	11.2388	11.2863	11.4616	11.6915	11.305	11.3625
ENSGALG00010001165	8.57664	8.45428	8.03276	8.46552	7.73688	7.93468	7.99534	8.11933	8.55346	8.73226	8.52052	7.66286	7.49226	7.57341	7.6837
ENSGALG00010001166	10.225	10.9213	10.6029	10.1694	9.48044	9.74788	10.3092	10.6276	10.6085	10.5893	10.9948	9.64631	10.5397	10.2303	10.3544
ENSGALG00010001167	9.10028	9.60468	9.21302	9.21399	8.18396	8.33469	9.52117	9.66197	9.61794	9.27958	10.1587	9.12529	10.1465	9.66049	9.63083
ENSGALG00010001168	3.56255	3.79854	3.29159	3.32518	2.36818	3.12336	4.16268	4.53128	4.14864	4.22579	4.36061	3.09206	3.39194	2.36818	3.66794
ENSGALG00010001169	10.7741	10.8929	10.8193	10.7391	10.6919	10.5696	10.6502	10.7076	10.874	10.8121	10.6231	10.8418	11.0277	10.7991	10.8662
ENSGALG00010001170	9.76399	9.9434	9.8275	9.75106	9.66918	9.52228	9.79397	9.72675	9.78176	9.85188	9.65514	9.87152	9.95754	9.88131	9.90214
ENSGALG00010001171	8.80161	8.84323	8.93842	9.19478	9.29124	8.92602	9.04275	8.87273	9.19058	8.85255	8.85249	9.18573	9.33831	9.0737	9.14012
ENSGALG00010001172	3.44225	4.73469	3.49004	7.11838	7.01003	6.6616	6.67362	4.75538	3.38526	4.40176	4.73316	6.58981	7.00549	7.31314	6.38383
ENSGALG00010001173	9.48815	9.42324	9.3132	9.301	8.86018	8.8466	9.2535	9.29206	9.59983	9.38592	9.22119	8.96208	9.09064	8.99478	9.48144
ENSGALG00010001174	8.25087	7.81808	8.10336	8.24042	7.4547	7.49945	7.98061	7.97209	8.51881	8.35387	8.34639	8.07883	8.68458	8.53458	8.56816
ENSGALG00010001176	2.36818	2.36818	2.36818	2.92738	2.36818	2.36818	2.36818	3.22162	2.9634	3.30684	2.36818	3.3817	2.96741	2.36818	3.20646
ENSGALG00010001177	9.15249	8.875	9.31568	9.08846	9.06881	8.74319	9.36546	8.86986	8.86339	8.88975	9.37611	9.14233	9.23393	9.16921	8.94138
ENSGALG00010001178	9.73003	9.89298	9.65221	9.41992	9.39079	9.50515	9.50067	9.61312	9.518	9.68997	9.73041	9.49795	9.53389	9.5439	9.45035
ENSGALG00010001179	5.62899	5.52099	5.25072	5.66227	5.57398	5.21353	4.46461	6.07879	5.47538	5.20028	6.35703	5.91459	4.77745	6.01221	4.71944
ENSGALG00010001180	8.13259	8.19636	8.2915	10.0915	11.3862	11.3718	10.7016	7.46474	7.63128	7.80087	7.71614	11.5858	11.4323	11.4972	10.543
ENSGALG00010001181	10.0536	9.812	9.72863	9.51901	9.50457	9.4254	9.5464	9.50647	9.74027	9.76571	9.59599	8.97355	8.99933	9.02913	9.38222
ENSGALG00010001182	8.01213	7.79782	8.08603	8.64043	8.81677	8.69865	8.58315	8.19914	8.03603	8.21052	8.45396	8.75604	8.94746	8.83997	8.54063
ENSGALG00010001183	9.60516	9.35037	9.08224	9.82289	9.39448	9.49361	9.37676	9.94392	9.16168	9.26903	10.2714	8.33756	7.59705	8.70482	9.2504
ENSGALG00010001185	9.91491	10.1799	9.79232	9.44289	9.62583	9.46435	9.68914	10.0939	9.68666	9.81005	9.70699	9.59276	9.99251	9.69893	9.42423
ENSGALG00010001187	8.94885	8.61629	9.12528	9.20249	9.5417	9.68586	9.44542	8.9776	9.11605	8.96139	8.99363	9.61246	9.57207	9.91436	9.55377
ENSGALG00010001188	9.13144	8.97759	8.80006	9.33122	9.96341	9.82357	9.53888	8.75031	9.08323	8.77514	9.03974	9.46581	9.84013	9.37908	9.24615
ENSGALG00010001190	7.29436	7.58964	7.16618	7.52786	7.68952	7.69362	7.13994	7.19827	7.09488	7.83466	7.53192	7.07568	7.27358	7.12809	7.40701
ENSGALG00010001191	10.6987	10.6235	10.9115	10.8912	11.5723	11.4575	10.687	10.6002	10.2786	10.865	10.5425	11.4466	9.95491	10.8297	10.922
ENSGALG00010001192	9.03378	8.68407	8.75692	8.53132	7.94277	9.4132	8.25002	8.23966	8.35563	8.62052	8.23704	7.8979	8.25602	8.35361	8.52667
ENSGALG00010001193	7.66855	7.76688	8.05668	9.78614	10.871	11.2399	10.2336	8.03485	7.39176	7.73081	8.11123	10.2877	10.1985	10.1615	9.99124
ENSGALG00010001194	7.69488	7.4984	6.95306	7.36541	6.23618	6.95933	7.62075	7.48736	7.27194	7.39122	7.48048	7.29908	7.61712	6.84875	7.7453
ENSGALG00010001195	7.56385	7.69749	6.99085	6.66069	6.39278	7.10316	6.65514	7.39464	7.13208	7.69447	7.50357	6.81109	7.22206	6.83151	6.48871
ENSGALG00010001196	7.07116	6.09012	7.57532	3.32518	4.62881	3.83221	3.75932	7.74063	7.78504	6.75721	7.0959	3.77479	3.89304	2.36818	3.388
ENSGALG00010001197	7.81018	7.79271	7.50749	8.20244	8.51796	8.12626	8.23768	7.72167	7.90798	7.82028	7.66586	8.30764	8.48434	8.45818	7.97863
ENSGALG00010001198	10.8428	11.0109	11.2574	11.4436	12.9982	12.6095	11.8066	11.4719	11.1273	10.6535	10.6993	13.1246	12.4952	12.7867	11.4075
ENSGALG00010001199	9.91155	9.93415	10.0448	10.3408	10.6646	10.7294	10.575	10.2072	9.98957	9.72126	9.85112	10.5516	10.5649	10.5219	10.4518
ENSGALG00010001200	8.93787	8.43801	8.78582	7.01688	7.55062	7.85571	7.11314	8.84673	8.81281	8.41895	8.86368	7.46014	7.93218	8.51316	7.23722
ENSGALG00010001201	11.1529	10.6199	11.5915	10.0311	9.31872	10.6908	10.0088	11.6394	11.6672	10.7027	11.4261	9.35904	8.93685	8.90719	9.64382
ENSGALG00010001202	6.80684	6.7173	6.94024	2.36818	3.75681	3.98948	3.37016	5.86367	7.32107	7.42332	7.2266	2.36818	2.96741	2.36818	3.388
ENSGALG00010001203	10.125	10.3914	10.1458	11.2399	11.5836	11.4663	11.4622	10.7003	10.1062	10.0932	10.6178	11.5266	11.845	11.3548	11.5046
ENSGALG00010001204	10.3478	10.5489	10.3615	10.399	10.2893	10.2546	10.2289	10.5687	10.4092	10.3756	10.4777	9.98358	10.2368	10.0746	10.1578
ENSGALG00010001205	7.82932	7.78243	8.19242	7.29493	6.9709	7.07242	7.57241	8.46527	7.95021	7.96678	8.53738	7.38186	7.85542	7.57341	7.91036
ENSGALG00010001206	8.42451	8.55727	7.88693	8.18307	7.98261	7.88252	7.75672	8.34247	8.32386	8.16192	8.17011	8.18137	8.2302	8.02326	8.11552
ENSGALG00010001207	2.36818	2.36818	2.36818	2.36818	2.36818	2.36818	2.36818	2.36818	2.36818	2.36818	2.36818	2.36818	3.54258	2.36818	2.36818
ENSGALG00010001208	5.03265	4.73469	5.25072	5.0827	3.51578	3.42463	4.46461	3.22162	5.07033	4.40176	4.69196	3.92692	3.89304	4.08302	4.37086
ENSGALG00010001209	5.19231	5.68609	4.68375	3.58963	2.36818	3.42463	3.91005	5.58196	5.71709	5.78441	5.68794	3.09206	2.36818	3.10226	3.88744
ENSGALG00010001210	4.01505	5.24535	4.54913	5.51964	4.62881	4.56511	6.22442	4.59096	5.3846	4.73779	5.31777	4.805	4.44297	4.68241	7.26274
ENSGALG00010001212	2.36818	3.46747	3.49004	2.36818	2.36818	2.36818	2.36818	3.69057	6.15897	3.94339	3.12136	2.36818	2.36818	2.36818	2.36818
ENSGALG00010001213	10.2782	11.1225	10.4779	9.50035	8.71406	9.4878	10.102	10.818	10.3708	10.8556	10.9509	9.0369	8.95798	9.61347	9.55721
ENSGALG00010001214	10.5452	9.6003	10.8758	8.08629	8.73169	8.2549	8.52342	11.0343	10.1611	9.92985	10.0126	8.49449	8.31453	8.62221	8.15236
ENSGALG00010001215	3.44225	3.15467	2.36818	2.36818	2.36818	3.12336	2.36818	2.36818	3.53501	2.91642	2.36818	2.36818	2.36818	2.36818	4.43584
ENSGALG00010001216	3.44225	3.46747	3.49004	5.61631	5.62577	5.15493	5.3023	3.80759	3.53501	3.77145	3.74093	5.42246	4.62078	4.96936	4.61322
ENSGALG00010001217	2.91444	2.36818	2.36818	2.36818	2.36818	2.36818	2.36818	2.36818	2.36818	2.36818	2.36818	3.09206	2.96741	3.39571	2.36818
ENSGALG00010001218	8.30314	8.25326	8.13741	8.60303	8.58418	8.6733	8.2924	8.57842	7.90798	8.4473	8.48617	7.9218	8.2302	8.20791	8.35163
ENSGALG00010001219	5.73528	5.3622	5.07056	3.15421	2.36818	3.98948	4.16268	6.03829	4.06671	4.93462	5.62554	2.36818	2.36818	3.10226	4.22999
ENSGALG00010001220	10.6678	10.798	10.3164	10.9662	11.5216	11.3351	11.2937	10.6402	9.80495	10.4883	10.6799	11.294	11.7968	11.2775	11.4644
ENSGALG00010001221	9.28832	9.11284	9.25496	8.87816	8.95831	8.72356	8.40151	9.16458	9.18396	8.93272	8.92692	8.94664	8.74963	8.87817	8.55102
ENSGALG00010001222	5.69372	5.81371	5.29233	5.04803	4.91152	5.69434	5.78672	5.07535	5.35299	4.50689	5.46823	5.32878	5.08479	4.83349	6.01325
ENSGALG00010001223	2.36818	2.36818	2.36818	2.36818	2.36818	3.12336	2.36818	2.36818	2.36818	2.36818	2.36818	2.36818	2.96741	2.36818	2.36818
ENSGALG00010001224	9.16572	9.69779	9.30823	8.57358	9.77218	9.51088	8.89739	9.50093	9.01527	8.86895	8.90975	9.54485	9.16973	9.18283	8.71388
ENSGALG00010001225	8.49211	8.53603	8.14858	8.1152	8.25886	8.55613	8.36794	8.39923	8.27071	8.04721	8.22321	7.79814	8.33487	8.33542	8.61179
ENSGALG00010001226	4.39535	4.54462	3.65355	4.64195	4.72982	4.89186	4.0431	5.07535	4.60795	4.09288	4.30548	4.29153	3.39194	4.41755	3.78323
ENSGALG00010001227	8.99406	9.29726	9.01365	13.2744	14.6983	14.3229	13.8854	8.73149	8.36346	9.00231	9.34131	14.3519	14.4328	13.6711	14.0046
ENSGALG00010001228	7.97394	8.45751	8.02672	8.1111	7.77141	7.79116	8.1283	8.03485	7.58512	7.94926	7.93992	8.17476	8.09366	7.87999	8.37909
ENSGALG00010001229	8.69872	8.88703	8.52801	8.72053	9.07803	9.00942	8.81259	8.82619	8.62035	8.3965	8.57599	9.21825	9.33428	9.23609	8.88778
ENSGALG00010001230	6.98834	7.87237	7.47234	9.01807	10.5216	9.77911	8.95504	7.64995	6.86005	6.67416	9.47134	9.89383	8.96321	9.43424	8.83495
ENSGALG00010001231	3.8557	2.92771	3.0266	3.32518	3.75681	2.36818	4.0431	3.4062	2.9634	3.13898	2.90375	3.3817	2.96741	2.36818	2.96504
ENSGALG00010001232	8.55668	8.20022	8.10909	8.26642	7.62804	7.83756	8.37359	8.43457	8.54315	8.29615	8.37483	7.99871	7.92146	8.25384	8.1569
ENSGALG00010001233	9.90818	9.66462	9.28311	11.9289	11.5723	12.3729	11.6226	9.46341	9.66781	9.65799	10.214	11.4892	11.3185	11.0959	12.0166
ENSGALG00010001234	9.07043	8.40156	8.61111	8.50349	8.81126	9.22365	8.39597	8.63014	9.01278	8.13892	8.888	8.80396	8.9606	9.11338	8.83778
ENSGALG00010001235	4.44886	6.0215	4.31686	2.36818	3.51578	2.36818	3.08366	5.63753	3.97873	4.65021	5.344	3.3817	3.20974	3.61431	3.53812
ENSGALG00010001236	2.91444	3.46747	2.36818	3.15421	2.36818	2.36818	3.08366	3.22162	3.20418	3.13898	2.36818	2.36818	2.96741	2.36818	2.36818
ENSGALG00010001237	5.51404	6.21819	5.91203	7.42603	5.34535	6.1443	7.31474	6.87098	6.90374	6.5631	7.84823	7.17191	7.7862	7.62427	7.16688
ENSGALG00010001238	11.1212	11.1744	11.0189	10.1772	10.3419	10.1792	10.1603	11.3042	11.0193	10.9718	11.0964	10.1309	10.4961	10.3604	10.1488
ENSGALG00010001239	2.36818	2.92771	2.36818	3.46686	2.36818	2.36818	3.37016	2.36818	2.36818	2.91642	2.36818	2.36818	3.78851	3.39571	3.66794
ENSGALG00010001241	2.36818	3.15467	2.36818	2.36818	2.36818	2.36818	2.36818	2.36818	2.36818	2.36818	2.36818	2.36818	2.36818	2.36818	2.36818
ENSGALG00010001242	2.36818	2.36818	2.36818	2.36818	2.36818	2.36818	2.36818	2.36818	2.36818	2.91642	2.36818	2.36818	2.96741	2.36818	2.36818
ENSGALG00010001244	5.44028	5.77244	5.44737	5.6847	5.46432	5.77353	5.14958	6.0176	5.28753	6.13571	5.74769	5.46705	3.98872	5.77903	4.90953
ENSGALG00010001245	7.50553	8.0456	6.57577	7.65145	6.2689	7.2884	8.1283	7.84357	6.98734	7.07288	7.91862	6.9572	6.2118	6.86577	7.84995
ENSGALG00010001246	2.91444	2.92771	2.36818	2.36818	2.36818	2.36818	2.36818	2.36818	2.36818	3.30684	2.36818	2.36818	2.36818	2.36818	2.36818
ENSGALG00010001248	10.7019	10.4041	10.3189	12.8757	12.982	12.6497	12.4885	10.5669	10.5573	10.3525	10.627	12.7511	13.0938	12.8189	13.4411
ENSGALG00010001249	9.9205	9.85551	9.60028	9.71376	10.0456	9.86893	9.82934	9.98554	9.74926	9.60445	9.68824	9.61246	9.79682	9.62349	9.55377
ENSGALG00010001251	7.59215	7.15226	7.79036	7.50307	6.93069	7.48786	7.88097	7.75313	7.49525	7.11281	7.62434	6.52872	7.20447	6.84875	7.55887
ENSGALG00010001252	7.65788	8.31513	7.46341	8.34521	7.80513	7.88252	8.4926	7.8725	7.61824	7.21905	7.42713	8.38416	8.2302	8.58163	8.22333
ENSGALG00010001253	2.36818	2.36818	2.36818	2.36818	3.19006	2.36818	2.36818	2.97599	2.36818	2.36818	2.90375	3.09206	2.36818	2.36818	2.36818
ENSGALG00010001254	2.91444	4.05154	3.65355	5.5688	2.36818	3.83221	5.88569	2.36818	3.20418	3.13898	2.36818	3.09206	4.23658	4.51193	5.74822
ENSGALG00010001257	2.36818	3.32572	2.36818	2.36818	2.36818	2.36818	2.36818	2.36818	2.36818	2.36818	2.36818	2.36818	2.36818	2.36818	2.36818
ENSGALG00010001258	7.65788	7.2525	7.16618	7.11019	7.20803	6.92532	7.65828	7.66326	7.78504	7.66256	7.10348	7.2369	7.80382	7.56302	6.81086
ENSGALG00010001259	2.36818	2.36818	2.36818	2.36818	2.36818	2.36818	2.36818	2.36818	2.36818	2.36818	2.36818	2.36818	2.36818	2.36818	3.20646
ENSGALG00010001260	3.13622	2.92771	2.36818	2.92738	4.12108	2.36818	3.08366	2.36818	2.36818	2.36818	3.12136	4.18175	3.89304	2.36818	2.36818
ENSGALG00010001262	10.0566	8.77753	9.69474	7.90426	7.35194	7.72358	7.09955	9.93435	9.70526	9.46815	9.64609	7.47098	6.82144	7.48812	7.45943
ENSGALG00010001264	10.5795	10.9485	10.469	10.7543	10.9141	10.9691	10.921	10.7385	10.6183	10.6166	10.7866	10.6785	10.784	11.0905	11.0186
ENSGALG00010001265	5.06609	4.43816	5.20783	4.43712	4.62881	5.3238	4.27158	5.19249	5.81253	5.54626	4.24782	3.59763	3.89304	3.39571	4.90953
ENSGALG00010001266	2.91444	2.36818	2.36818	2.36818	3.51578	2.36818	2.36818	2.36818	2.36818	2.36818	2.36818	3.59763	2.36818	2.36818	2.36818
ENSGALG00010001267	8.61022	10.1108	8.10336	9.2974	4.40004	7.5781	9.79607	8.96423	8.80995	8.22878	9.52306	8.7516	7.71349	6.79642	6.9846
ENSGALG00010001268	2.36818	2.36818	2.36818	4.25883	2.36818	2.36818	3.08366	3.22162	2.36818	2.36818	2.36818	2.36818	2.36818	3.94737	2.36818
ENSGALG00010001270	9.65159	9.43967	9.85332	10.3973	10.5649	10.5778	10.1942	9.60108	9.75522	9.96948	10.0464	10.3463	9.96147	10.4105	10.0522
ENSGALG00010001271	8.14027	7.79782	8.38892	8.54656	9.03133	8.73831	8.35085	8.05012	8.22415	8.48729	7.97337	8.76046	7.74424	8.54517	8.01908
ENSGALG00010001272	3.13622	3.79854	2.36818	3.46686	2.36818	2.36818	2.36818	2.36818	5.07033	2.36818	3.54014	2.36818	2.36818	2.36818	2.36818
ENSGALG00010001273	4.85192	3.15467	5.96389	2.36818	3.19006	2.36818	2.36818	6.17529	5.32065	4.40176	4.77312	2.36818	2.96741	2.36818	2.36818
ENSGALG00010001274	2.91444	3.15467	3.65355	2.36818	4.51944	4.89186	4.16268	3.4062	2.36818	3.5667	3.82855	3.59763	3.39194	4.68241	3.20646
ENSGALG00010001276	3.66965	3.69959	4.13432	3.15421	4.26834	3.12336	2.36818	2.97599	3.66453	4.69472	3.90973	5.1201	2.36818	3.10226	2.36818
ENSGALG00010001277	7.28746	7.68099	7.51615	7.69039	7.4688	7.62119	7.42775	7.32933	7.51649	7.60777	7.40277	7.69095	7.08457	7.37386	7.23722
ENSGALG00010001279	7.90344	8.88703	8.20853	8.49409	10.0896	9.40706	9.47987	8.43844	7.5784	7.66256	8.1665	10.2155	9.49648	9.01015	9.10062
ENSGALG00010001281	3.44225	3.15467	2.36818	5.59276	2.36818	6.17367	4.78143	3.22162	3.77956	3.30684	2.36818	3.3817	3.20974	3.79355	6.63943
ENSGALG00010001282	2.36818	2.36818	2.36818	2.36818	2.36818	2.36818	2.36818	2.36818	3.53501	2.36818	2.36818	2.36818	2.36818	2.36818	2.36818
ENSGALG00010001283	8.02464	7.80291	7.56702	7.72832	8.29094	7.93468	7.78244	7.57448	8.28315	8.0717	7.81633	7.93751	7.94282	7.65394	7.83869
ENSGALG00010001285	8.05748	7.90588	8.41228	7.74427	7.95283	8.0495	8.14161	7.92315	8.90691	8.10373	8.12245	7.77208	7.83271	7.92124	7.81015
ENSGALG00010001286	8.25087	8.01521	8.39362	8.21775	8.73169	8.19201	8.36227	8.2441	8.19372	8.17705	7.99389	8.37265	8.87988	8.29207	8.61839
ENSGALG00010001287	4.89003	7.97518	7.12148	6.17003	4.26834	4.2523	5.91721	8.23966	8.0555	6.67416	6.81103	4.87412	5.30264	4.08302	8.03397
ENSGALG00010001288	8.43078	8.2936	8.20318	8.71784	8.69621	8.56719	8.67295	8.30477	8.00131	8.21785	8.3591	8.41816	8.85475	8.60206	8.62823
ENSGALG00010001289	5.44028	4.49248	5.11785	5.51964	6.13327	5.61044	5.68031	5.63753	5.25361	5.47367	5.02401	6.54937	6.15777	5.25971	5.7723
ENSGALG00010001291	8.10929	7.96158	8.32635	8.28107	7.79398	8.08839	8.30428	7.97742	8.77515	8.04309	7.80708	8.02101	8.05004	7.68302	7.76922
ENSGALG00010001292	11.8812	12.4113	12.0042	12.0501	12.1223	12.5585	11.9258	12.2466	11.3505	11.8894	12.0169	11.8076	10.4679	11.5142	11.9181
ENSGALG00010001294	4.01505	2.36818	3.29159	2.36818	4.40004	3.64872	3.08366	3.4062	2.9634	2.91642	3.82855	3.92692	3.20974	3.39571	3.20646
ENSGALG00010001295	9.71725	10.0659	10.0538	9.32593	9.59083	9.64732	9.26874	9.61483	10.1944	9.85306	9.60801	9.62948	9.36228	9.49558	9.12862
ENSGALG00010001297	11.2878	11.3021	11.4446	11.0626	11.578	11.2502	11.1693	11.5603	11.0728	11.054	11.5614	11.086	11.1787	11.2101	11.0048
ENSGALG00010001298	8.73468	8.48627	8.51512	5.92937	5.57398	5.42599	6.19907	8.97227	8.65586	8.55833	8.40884	5.74496	6.06292	5.36072	6.3524
ENSGALG00010001300	8.4055	8.54213	8.34589	8.93715	9.10534	8.80519	9.01411	8.66693	8.3438	8.73482	8.74527	9.10456	8.5726	8.76495	8.84623
ENSGALG00010001301	8.73975	8.83828	8.85564	9.13556	8.95831	9.0175	9.12878	9.13863	8.67487	8.82641	9.06904	9.10804	9.46177	9.11693	9.46872
ENSGALG00010001304	9.04201	9.03279	8.89597	9.40495	9.47346	9.22714	9.0984	9.13147	9.16168	9.40532	9.20192	9.35027	9.28288	9.17263	9.34293
ENSGALG00010001305	8.59632	10.3973	7.65586	8.98267	10.3572	9.74302	9.11535	8.02972	7.92925	8.59821	8.01814	10.443	10.4916	10.3408	9.33694
ENSGALG00010001306	8.82325	8.73821	8.40764	8.24789	8.18396	7.99323	8.36227	8.82026	8.60722	8.63428	8.3591	8.15473	8.659	8.32317	8.53716
ENSGALG00010001307	9.42194	9.6813	10.0054	9.35564	9.82242	9.36968	8.93608	10.141	10.0719	9.85893	10.2008	9.7411	9.25542	9.63345	9.10533
ENSGALG00010001308	8.46789	8.86286	8.87595	8.10288	8.11395	7.97674	7.99534	8.82914	8.58394	9.11065	8.75971	7.65338	7.92683	7.93741	8.09675
ENSGALG00010001309	3.13622	4.90107	4.91805	4.05065	5.07177	3.98948	3.58388	3.4062	4.94739	4.40176	4.36061	3.3817	3.54258	3.79355	3.98283
ENSGALG00010001310	4.54966	5.79322	6.03831	4.54354	5.28184	3.64872	3.37016	4.53128	4.60795	4.73779	5.36974	4.18175	4.07714	4.59993	4.55673
ENSGALG00010001313	10.8286	10.96	10.8008	9.86724	10.0338	9.72586	10.0215	11.2737	10.1779	10.565	11.4622	10.358	10.4	10.6078	10.3082
ENSGALG00010001315	2.36818	2.36818	2.36818	2.36818	2.36818	2.36818	2.36818	2.36818	2.9634	2.36818	2.36818	2.36818	2.96741	2.36818	2.36818
ENSGALG00010001318	3.66965	3.15467	3.0266	3.32518	2.36818	3.12336	4.70903	3.69057	2.36818	3.30684	3.82855	4.48602	3.39194	3.79355	3.20646
ENSGALG00010001319	7.97394	8.52067	8.61111	8.19859	8.54481	8.0807	7.77392	9.0118	8.78101	8.70643	9.04368	8.2771	7.87222	8.20123	8.08726
ENSGALG00010001320	8.51297	7.91532	7.90681	7.35852	7.52386	7.39158	8.1216	8.31324	7.75557	7.3977	7.34001	7.92968	8.07444	8.74212	7.49573
ENSGALG00010001321	2.91444	2.36818	2.36818	2.92738	2.36818	2.36818	2.36818	2.36818	2.9634	2.36818	2.36818	2.36818	2.36818	2.36818	3.53812
ENSGALG00010001322	2.36818	2.36818	3.29159	3.32518	3.51578	3.12336	2.36818	2.36818	3.53501	2.36818	2.90375	2.36818	2.36818	2.36818	2.36818
ENSGALG00010001323	2.36818	2.36818	2.36818	2.36818	2.36818	2.36818	2.36818	2.36818	2.36818	2.36818	2.36818	2.36818	3.20974	2.36818	2.36818
ENSGALG00010001326	2.36818	2.36818	2.36818	2.36818	2.36818	2.36818	2.36818	2.36818	2.36818	2.91642	2.36818	3.09206	2.36818	3.39571	2.36818
ENSGALG00010001327	6.66461	7.57185	7.51615	5.8325	4.62881	3.83221	4.0431	7.51699	7.22107	8.03065	6.95213	4.57328	4.87257	3.94737	4.76954
ENSGALG00010001328	4.44886	4.86135	4.9708	4.86017	5.40609	5.98762	4.97787	4.46873	5.03056	4.77952	4.88636	6.09459	4.87257	5.49975	5.15261
ENSGALG00010001330	8.38302	7.78758	8.9352	7.74955	7.33664	7.08787	7.7217	8.01423	8.99525	8.48426	8.17011	7.77208	7.95864	8.20123	7.86113
ENSGALG00010001331	2.36818	2.36818	3.0266	3.46686	2.36818	3.64872	3.91005	2.36818	3.20418	3.13898	2.90375	3.3817	3.39194	3.39571	3.388
ENSGALG00010001333	2.91444	4.49248	3.79447	4.43712	3.51578	3.98948	5.14958	3.4062	3.53501	2.91642	3.90973	3.09206	2.36818	3.61431	5.39091
ENSGALG00010001334	8.81367	8.66742	8.65093	5.77103	5.98337	5.73449	5.78672	9.00136	9.26144	8.72456	9.04368	5.94622	5.7819	5.70471	6.1106
ENSGALG00010001335	4.68767	4.125	3.91923	4.1933	3.19006	3.64872	4.16268	3.22162	3.97873	3.30684	4.05664	3.77479	3.89304	3.61431	3.66794
ENSGALG00010001338	2.36818	2.92771	2.36818	2.36818	2.36818	3.12336	3.08366	2.97599	2.9634	2.36818	2.36818	2.36818	2.96741	2.36818	2.96504
ENSGALG00010001339	2.36818	2.36818	2.36818	2.92738	3.19006	2.36818	3.08366	2.36818	2.36818	2.36818	2.36818	2.36818	2.36818	3.39571	3.20646
ENSGALG00010001340	2.91444	2.36818	2.36818	2.36818	2.36818	2.36818	2.36818	2.36818	2.36818	3.13898	3.42189	2.36818	2.96741	2.36818	2.36818
ENSGALG00010001341	2.36818	3.15467	2.36818	2.36818	2.36818	3.42463	2.36818	2.97599	3.53501	2.91642	2.36818	2.36818	2.36818	3.39571	2.96504
ENSGALG00010001342	2.36818	2.36818	2.36818	2.36818	3.19006	2.36818	2.36818	2.36818	2.36818	3.13898	2.90375	3.09206	2.96741	3.79355	2.36818
ENSGALG00010001343	2.36818	2.36818	2.36818	2.36818	3.51578	2.36818	2.36818	2.36818	2.36818	3.44602	2.36818	3.92692	2.36818	3.10226	3.53812
ENSGALG00010001344	2.36818	3.15467	2.36818	2.36818	2.36818	2.36818	2.36818	2.36818	2.36818	2.36818	2.36818	2.36818	2.36818	2.36818	3.20646
ENSGALG00010001346	2.36818	3.88926	3.0266	3.32518	2.36818	3.12336	3.37016	2.36818	2.9634	3.5667	3.54014	2.36818	2.36818	3.10226	3.388
ENSGALG00010001347	4.73065	5.15078	3.91923	4.97596	5.85959	6.36393	6.22442	5.26541	5.03056	4.82	5.23599	6.9572	5.52005	5.20631	6.03326
ENSGALG00010001348	2.36818	2.36818	2.36818	3.88844	2.36818	2.36818	2.36818	2.36818	2.36818	2.36818	2.36818	2.36818	2.36818	2.36818	3.53812
ENSGALG00010001349	9.32417	9.79549	9.58186	7.84139	7.8489	7.90883	8.19364	9.16458	9.53023	9.353	8.70353	8.23956	8.27719	8.07535	7.9264
ENSGALG00010001350	5.92656	5.21454	6.24074	4.97596	5.14539	3.98948	5.14958	5.15453	6.12232	5.63757	5.49181	4.73215	4.62078	5.88368	5.79597
ENSGALG00010001351	8.18924	9.07126	9.21568	9.31885	9.11881	9.34741	9.09156	9.07536	9.07372	9.33794	8.99973	9.15918	8.67504	8.70954	9.3469
ENSGALG00010001352	4.54966	4.82044	4.9708	5.04803	4.40004	3.83221	3.58388	3.80759	4.85881	4.28722	5.31777	4.48602	3.78851	4.08302	3.88744
ENSGALG00010001353	9.57997	9.32052	9.60028	10.2072	10.3964	10.2884	10.4388	9.65866	9.76264	9.51205	9.78557	10.4662	10.4835	10.1459	10.1522
ENSGALG00010001357	2.36818	2.36818	2.36818	2.92738	2.36818	2.36818	3.08366	2.36818	2.36818	2.36818	2.36818	2.36818	2.36818	2.36818	2.36818
ENSGALG00010001358	3.30352	4.125	4.13432	4.12408	3.95331	6.17367	4.46461	4.26041	4.60795	4.22579	4.64945	3.09206	2.96741	3.39571	5.11497
ENSGALG00010001359	4.21979	4.19425	4.13432	5.04803	5.07177	5.56655	5.09469	4.75538	3.88354	3.94339	3.42189	5.22836	4.15947	4.20483	4.99544
ENSGALG00010001361	3.93813	4.05154	2.36818	2.92738	2.36818	3.12336	2.36818	3.4062	2.36818	2.91642	2.90375	3.09206	2.36818	2.36818	3.20646
ENSGALG00010001363	8.20031	8.12498	7.83946	8.02233	8.24255	8.39797	8.19364	8.27475	8.3438	8.07978	8.20573	8.12072	7.88331	7.7759	8.27018
ENSGALG00010001364	9.6176	10.2317	9.56737	9.66155	9.59083	9.72586	9.79607	10.2639	9.6439	9.63216	9.6383	9.73886	10.1534	10.0073	9.97334
ENSGALG00010001365	5.85311	5.52099	5.91203	5.3037	4.82372	5.61044	5.43993	5.26541	5.69219	6.22618	5.70814	5.3764	4.82584	5.45492	4.49769
ENSGALG00010001366	2.36818	2.92771	2.36818	2.36818	3.19006	3.12336	2.36818	2.36818	3.97873	2.91642	2.90375	3.09206	2.96741	2.36818	2.36818
ENSGALG00010001367	2.36818	4.32209	3.49004	3.46686	3.19006	3.12336	3.58388	4.26041	4.43087	3.77145	3.64546	3.59763	3.78851	4.41755	4.37086
ENSGALG00010001368	6.86374	7.05309	6.41803	4.12408	5.52022	4.2523	5.3023	7.07415	6.63214	7.03181	5.93044	5.17529	5.33584	5.74235	5.56713
ENSGALG00010001369	10.0071	9.94109	9.94906	9.49565	9.96838	10.0314	9.96461	10.2038	10.0221	9.88334	9.95624	9.83005	10.338	10.0801	9.64866
ENSGALG00010001371	2.36818	2.92771	2.36818	2.92738	2.36818	4.46906	2.36818	2.36818	3.53501	2.36818	2.36818	2.36818	2.96741	3.94737	2.36818
ENSGALG00010001372	4.01505	4.125	4.68375	3.15421	3.75681	3.42463	3.08366	4.46873	5.03056	3.67413	3.90973	3.09206	2.96741	3.10226	3.388
ENSGALG00010001373	9.38362	9.32406	9.49483	10.7398	12.2779	11.898	11.2952	9.20834	9.67254	8.54382	9.57708	11.949	11.5949	11.4965	11.3467
ENSGALG00010001374	2.36818	2.36818	2.36818	2.92738	2.36818	2.36818	2.36818	2.36818	2.36818	3.13898	2.36818	2.36818	2.96741	2.36818	2.36818
ENSGALG00010001375	3.66965	2.36818	3.49004	2.36818	2.36818	2.36818	2.36818	2.36818	3.38526	3.5667	3.74093	2.36818	2.36818	2.36818	2.36818
ENSGALG00010001376	4.39535	4.32209	3.91923	4.1933	3.19006	4.73844	3.91005	3.80759	3.66453	3.13898	3.64546	3.77479	4.15947	3.79355	4.3024
ENSGALG00010001377	2.36818	2.92771	2.36818	2.36818	3.19006	2.36818	2.36818	2.36818	2.36818	2.36818	2.36818	2.36818	2.36818	2.36818	2.96504
ENSGALG00010001378	7.27354	7.30372	7.67144	7.95996	7.35194	7.17725	8.1081	7.48736	8.14911	7.21172	8.05375	7.95306	8.0352	7.90488	7.84434
ENSGALG00010001380	5.22215	5.18303	5.77344	4.25883	5.21529	4.89186	5.09469	5.15453	4.76403	4.77952	5.87804	4.805	5.43097	3.94737	3.88744
ENSGALG00010001381	10.4285	10.5451	10.5938	9.41992	9.39079	9.58616	9.46142	10.6528	10.1955	10.0123	10.227	9.23105	9.15151	9.59065	9.14926
ENSGALG00010001382	10.4664	10.1108	10.0729	9.00048	9.34951	9.31499	9.13211	9.93572	9.78322	9.92313	9.8612	8.93495	8.89912	8.69534	9.04784
ENSGALG00010001384	3.30352	3.32572	3.29159	3.46686	3.51578	2.36818	4.16268	3.80759	3.97873	2.91642	3.12136	3.09206	3.20974	3.39571	3.53812
ENSGALG00010001385	5.81491	7.29651	4.9708	9.0115	8.50435	8.58904	9.48249	7.76552	6.57918	5.006	6.55839	9.20533	9.40905	9.83027	10.3204
ENSGALG00010001386	7.64713	9.05642	8.41228	8.68517	9.31872	8.84206	9.1018	8.77196	9.01278	8.33039	9.3171	8.72016	8.52384	9.19633	8.57495
ENSGALG00010001387	2.36818	2.36818	2.36818	2.36818	2.36818	2.36818	2.36818	2.36818	3.53501	2.91642	2.36818	2.36818	2.96741	2.36818	2.36818
ENSGALG00010001388	8.37001	8.06268	8.36518	8.38644	8.28299	7.90883	8.42347	8.16681	8.72436	9.11459	8.43907	7.99871	9.03207	8.12562	7.88321
ENSGALG00010001390	3.66965	4.25981	3.49004	3.88844	3.19006	3.42463	2.36818	2.36818	3.38526	2.91642	4.60553	4.29153	3.39194	2.36818	3.388
ENSGALG00010001391	2.36818	2.36818	2.36818	2.36818	2.36818	3.12336	2.36818	2.36818	2.36818	2.36818	2.36818	2.36818	2.36818	3.39571	2.36818
ENSGALG00010001394	3.13622	3.15467	3.0266	2.36818	2.36818	2.36818	2.36818	2.36818	2.36818	2.91642	2.36818	2.36818	2.96741	3.79355	2.36818
ENSGALG00010001395	8.51888	8.02396	8.36518	8.07793	7.68952	8.10366	7.88097	8.20824	8.06514	8.33714	8.17011	7.88175	8.11263	7.99263	8.09201
ENSGALG00010001397	10.0586	10.174	10.0283	10.2572	11.7565	10.9836	10.6373	9.68823	9.92754	9.80031	9.71072	11.7286	11.2186	11.4253	10.5662
ENSGALG00010001398	8.88856	8.68407	8.47575	8.92788	8.81126	9.62898	8.88952	9.16925	8.35563	8.63154	8.83895	9.39077	8.80023	8.69534	8.36346
ENSGALG00010001400	7.93471	7.86752	7.93935	7.74955	7.32118	7.64226	7.89675	8.08019	7.69477	7.71535	7.64525	7.8736	7.85542	7.4435	7.89413
ENSGALG00010001402	6.98834	7.42762	6.81942	7.04294	7.35194	6.94243	6.86261	6.94921	7.28024	6.71628	6.94371	7.2369	7.31514	6.79642	7.39167
ENSGALG00010001404	2.36818	2.92771	3.65355	2.36818	2.36818	3.12336	2.36818	2.36818	2.9634	2.36818	3.12136	2.36818	2.36818	2.36818	2.96504
ENSGALG00010001406	9.18813	9.16516	9.69284	9.59277	9.9758	9.76957	8.9437	9.21963	9.57812	9.63216	9.46988	9.75002	8.91811	9.55704	9.53123
ENSGALG00010001407	6.61019	5.68609	5.98913	4.38042	3.19006	3.42463	3.37016	6.46181	6.04608	5.59266	6.12264	3.09206	2.96741	2.36818	3.78323
ENSGALG00010001409	11.2524	10.9382	10.4823	15.2313	13.8753	14.8285	14.8431	10.1445	10.9416	11.8808	11.1468	13.3986	13.502	13.7536	15.3431
ENSGALG00010001411	10.7226	10.6916	10.3853	10.9149	11.3524	11.1287	11.0562	10.5616	10.3978	10.6005	10.1946	10.917	11.5148	11.1013	11.4003
ENSGALG00010001412	4.59728	5.08394	5.20783	6.27668	5.77064	5.9541	6.45591	6.05869	5.14658	5.39711	6.01369	6.17673	6.46983	6.5233	6.90035
ENSGALG00010001414	8.83749	8.9888	8.80006	8.57656	8.6225	8.22729	8.68208	8.91504	8.79844	8.48121	8.79521	8.57202	8.90457	8.44127	8.54756
ENSGALG00010001415	6.81648	7.31089	7.08701	3.46686	5.40609	3.64872	4.16268	6.94921	7.53743	6.99809	7.71614	5.59291	3.98872	4.41755	3.88744
ENSGALG00010001416	8.25087	7.74588	8.21385	8.25162	8.77769	8.16316	8.00993	8.03485	8.4506	8.38678	8.00202	8.41816	7.92146	8.51316	8.27436
ENSGALG00010001418	8.40869	8.48627	8.20853	8.55562	8.64749	8.90875	8.84548	8.60968	8.10306	8.11948	8.3591	8.66461	9.03952	8.46935	8.82643
ENSGALG00010001419	4.59728	4.32209	4.68375	3.69886	3.75681	4.12801	4.27158	4.46873	4.43087	3.77145	4.30548	2.36818	2.36818	2.36818	3.53812
ENSGALG00010001420	3.13622	3.32572	2.36818	3.15421	2.36818	3.12336	2.36818	2.36818	2.9634	4.16114	2.36818	3.3817	2.96741	4.08302	2.96504
ENSGALG00010001422	8.36017	8.15714	8.58257	9.12545	9.51479	9.30842	9.30171	8.47662	8.16712	8.64792	8.35593	9.50587	8.67185	9.22954	8.77125
ENSGALG00010001423	7.78098	7.75642	7.50749	7.94163	9.1628	8.60522	8.44509	7.75933	7.77332	7.61334	7.45701	8.89929	8.94481	8.41841	8.56474
ENSGALG00010001425	2.36818	2.92771	3.0266	2.36818	4.72982	3.42463	3.08366	2.97599	3.77956	3.77145	2.36818	3.77479	3.67284	3.61431	3.78323
ENSGALG00010001426	9.49415	9.25332	9.4992	8.98491	9.18003	8.70367	9.22254	9.51383	9.5458	9.44647	9.36827	9.22786	9.29746	9.0404	9.42235
ENSGALG00010001427	3.13622	2.92771	2.36818	2.36818	3.51578	2.36818	2.36818	2.36818	2.36818	2.36818	2.36818	2.36818	2.36818	2.36818	2.96504
ENSGALG00010001429	2.36818	2.36818	4.13432	4.32109	2.36818	2.36818	2.36818	2.36818	4.66204	2.36818	2.90375	2.36818	2.96741	2.36818	2.36818
ENSGALG00010001432	8.12873	7.96613	7.98369	8.04397	7.98261	8.17766	8.18724	8.148	8.10774	8.05951	8.23014	7.79814	8.3589	8.08989	7.62592
ENSGALG00010001435	2.36818	2.36818	2.36818	2.36818	3.19006	2.36818	2.36818	2.36818	2.36818	2.36818	2.90375	2.36818	2.36818	3.10226	2.36818
ENSGALG00010001436	2.36818	2.36818	2.36818	3.15421	2.36818	2.36818	3.91005	3.22162	2.36818	2.36818	2.90375	3.09206	2.36818	2.36818	2.36818
ENSGALG00010001437	2.36818	2.92771	3.49004	2.36818	2.36818	2.36818	2.36818	2.36818	2.36818	2.36818	2.36818	2.36818	2.36818	2.36818	2.36818
ENSGALG00010001440	8.30655	8.38129	8.26094	8.27742	8.22605	7.589	8.80006	8.56431	8.69982	8.39003	9.00176	8.34935	8.7647	8.59698	8.52316
ENSGALG00010001441	5.69372	6.24849	5.16357	6.64941	5.21529	6.3121	7.62075	5.66451	5.64103	5.86196	5.515	7.38186	6.29754	6.47966	7.2795
ENSGALG00010001442	10.3863	10.1402	9.99773	9.72452	10.9064	10.6692	10.0016	10.362	9.97047	9.94759	10.1723	10.704	10.3747	10.0562	9.65188
ENSGALG00010001443	8.37001	8.55727	8.46238	7.93238	7.8489	7.48786	7.64899	8.43068	8.82704	8.27522	8.57327	7.9912	8.45863	8.06802	8.43994
ENSGALG00010001447	2.36818	3.15467	3.0266	2.92738	2.36818	2.36818	3.08366	2.97599	2.36818	2.36818	2.36818	3.3817	2.36818	2.36818	3.388
ENSGALG00010001448	5.09875	5.59412	6.47256	4.49142	3.51578	4.46906	4.63249	6.98148	5.90196	6.0054	4.99087	4.06115	2.96741	4.41755	5.11497
ENSGALG00010001450	2.36818	3.69959	3.0266	5.24406	5.21529	4.81733	4.97787	2.97599	3.20418	3.77145	4.84966	4.06115	4.96145	4.41755	5.67343
ENSGALG00010001451	2.36818	2.92771	2.36818	2.36818	2.36818	2.36818	2.36818	2.36818	2.36818	2.36818	2.36818	2.36818	2.36818	2.36818	3.388
ENSGALG00010001453	11.1996	11.2509	11.0158	11.5358	12.0885	11.7077	11.6583	11.3476	10.6839	10.9902	10.881	11.999	12.2343	11.9358	11.6445
ENSGALG00010001454	7.5466	7.31089	7.06357	8.11928	6.13327	7.2339	8.30428	7.14231	6.12232	6.72662	7.58158	6.68619	7.14115	7.15603	8.39454
ENSGALG00010001456	6.28816	6.6734	6.64067	7.04294	6.30089	6.68213	6.51863	6.81238	6.57918	6.41737	7.0959	7.24955	6.68841	6.54462	6.62636
ENSGALG00010001457	5.4653	6.99191	6.41803	7.45863	5.9433	6.59819	7.77392	7.65662	6.94615	6.78715	8.17011	7.2621	8.14524	7.94543	7.6647
ENSGALG00010001458	8.32689	8.0413	8.4534	6.87903	5.90206	6.23066	7.09955	8.27041	8.57047	8.19202	8.32712	6.20309	6.96425	6.83151	6.79927
ENSGALG00010001460	8.75234	8.92721	8.86583	9.19864	9.0963	9.28518	9.26874	9.00136	9.10208	8.94381	8.9523	9.26257	9.69197	9.50916	9.39187
ENSGALG00010001461	5.87183	6.66222	6.83335	8.1152	8.31454	8.45859	8.27439	6.83611	6.15897	6.44271	6.60192	8.16144	8.13599	8.42416	7.81591
ENSGALG00010001462	9.90818	10.001	10.129	10.1091	10.3323	9.96398	10.2673	9.96287	10.1085	9.84952	9.84322	10.1845	10.354	10.2612	10.2887
ENSGALG00010001463	8.20764	8.68407	8.71995	6.78948	6.68679	6.89048	7.1266	8.53928	7.86999	8.38352	8.9544	6.75888	6.76249	6.58636	6.88947
ENSGALG00010001465	11.1419	10.9543	10.9654	10.7431	11.2774	11.0172	10.9656	10.8298	10.9456	10.8415	10.6511	11.5227	11.1663	11.287	10.8916
ENSGALG00010001466	9.93492	10.2261	9.93783	11.3642	11.5559	12.248	12.0698	10.1374	9.21242	9.92649	9.37454	11.319	11.5617	11.4224	11.9304
ENSGALG00010001468	6.84502	7.14425	6.5251	6.42969	7.19112	7.56713	7.37235	8.35483	6.61908	7.04012	6.74465	7.14506	7.25661	7.62427	7.78691
ENSGALG00010001469	9.24623	8.55124	9.01059	7.18227	6.23618	5.9541	7.40585	8.96959	8.87166	8.88975	8.38418	7.14506	7.91066	7.61424	7.31245
ENSGALG00010001470	6.35597	6.41794	6.5251	3.88844	3.95331	4.73844	3.58388	6.33408	7.3291	6.52803	6.8921	3.09206	4.07714	3.39571	4.66739
ENSGALG00010001471	7.0386	7.37387	6.64067	8.53744	6.61239	8.20623	8.70467	7.77167	7.15032	6.86408	6.90951	6.70471	6.2118	7.0996	8.70461
ENSGALG00010001475	9.10421	9.36937	8.99521	9.41661	9.5417	9.16666	9.52625	9.37927	9.22107	9.11851	9.15534	9.22466	9.06409	9.01015	9.20292
ENSGALG00010001476	7.01369	7.1362	6.90109	8.38644	7.20803	7.3149	8.58802	7.60238	7.0075	6.69538	7.32063	7.9218	8.45492	8.50233	8.83495
ENSGALG00010001477	5.06609	4.25981	4.39904	3.58963	3.75681	4.12801	4.27158	5.76759	4.43087	4.65021	5.14909	3.59763	3.67284	4.08302	4.49769
ENSGALG00010001479	8.65112	9.05429	8.72369	8.24042	8.53145	8.17766	8.54361	9.33216	8.43953	8.48121	8.89674	8.53636	8.84344	8.35361	8.56132
ENSGALG00010001480	2.36818	2.36818	3.0266	4.05065	3.75681	3.64872	4.37175	2.97599	3.66453	3.30684	2.90375	4.18175	5.00381	4.20483	4.71944
ENSGALG00010001482	11.2647	11.2084	11.295	10.8178	10.8017	10.7718	10.9925	10.9842	11.566	11.0282	11.0195	10.7525	11.2755	11.0418	11.0683
ENSGALG00010001483	5.27996	5.0137	5.20783	4.38042	3.75681	5.15493	5.85346	5.03398	5.07033	4.82	5.56026	3.92692	4.07714	4.68241	5.51081
ENSGALG00010001484	2.36818	2.36818	2.36818	2.92738	2.36818	2.36818	3.08366	2.36818	2.36818	3.13898	2.36818	2.36818	2.36818	2.36818	2.36818
ENSGALG00010001486	6.48266	6.1395	6.43644	2.36818	2.36818	3.12336	2.36818	5.63753	5.10898	5.97087	5.11886	3.59763	2.36818	3.79355	2.96504
ENSGALG00010001487	8.74983	7.61303	7.83255	4.73355	3.95331	5.09373	2.36818	8.93711	7.35291	8.05542	7.80708	5.27947	4.37784	3.61431	4.86446
ENSGALG00010001488	3.13622	2.36818	3.79447	2.36818	2.36818	2.36818	4.0431	3.22162	3.38526	3.5667	2.36818	2.36818	2.36818	2.36818	2.36818
ENSGALG00010001491	11.217	11.5152	11.1406	10.1605	10.7637	10.8211	10.4482	11.1236	11.0536	10.887	10.6968	10.9318	11.1893	11.0859	10.8003
ENSGALG00010001492	2.91444	2.92771	3.0266	3.15421	2.36818	2.36818	2.36818	3.22162	2.36818	3.13898	2.36818	2.36818	3.20974	2.36818	2.36818
ENSGALG00010001493	2.91444	3.15467	3.0266	2.92738	2.36818	2.36818	2.36818	2.97599	2.36818	2.91642	2.90375	2.36818	2.36818	2.36818	2.36818
ENSGALG00010001495	10.6444	10.9764	11.0204	9.57208	9.7083	9.82126	9.68914	10.6833	11.0426	10.2472	10.1496	10.0264	10.0403	9.88756	9.51364
ENSGALG00010001496	10.4433	10.3624	10.172	10.2101	10.2119	10.1846	10.2914	10.4813	10.263	10.0487	10.2923	9.84261	10.1198	10.1035	10.1969
ENSGALG00010001497	4.08723	4.25981	4.13432	5.3037	5.34535	6.23066	5.48295	3.9133	3.88354	4.28722	3.82855	5.00263	5.8056	5.20631	5.93028
ENSGALG00010001499	8.83985	9.5253	8.84538	8.60885	8.58418	9.11863	8.73571	9.22413	8.10774	8.61775	8.71593	8.6787	8.32677	8.48043	8.05358
ENSGALG00010001501	11.3648	11.089	10.9511	10.7784	10.9089	10.8531	11.2391	11.486	11.193	10.8973	11.138	10.6406	10.9348	10.96	10.8876
ENSGALG00010001504	7.93029	8.07956	7.56702	7.45217	7.36708	7.36647	7.26692	7.98274	7.91865	8.06765	8.08469	7.01766	7.35554	7.5314	7.20248
ENSGALG00010001505	10.5408	11.0349	10.6587	10.9365	11.1908	10.9846	10.8888	10.9198	10.7762	10.9081	11.4415	10.9151	10.44	10.9361	10.7305
ENSGALG00010001506	4.68767	3.59031	4.80599	8.22913	5.28184	7.07242	5.3023	4.7028	5.47538	5.39711	4.24782	6.20309	5.89664	7.63423	7.51001
ENSGALG00010001507	6.76762	6.84147	6.5078	6.49418	6.50679	6.20245	5.97822	6.57907	6.36107	6.58601	7.16997	6.3518	6.64988	6.64676	6.45952
ENSGALG00010001508	10.3871	10.0478	9.71179	7.84633	7.4966	6.59819	7.20483	10.1012	9.19497	9.74303	9.93942	7.44922	7.50668	7.31314	7.94227
ENSGALG00010001510	9.73385	9.3364	9.30324	8.81414	8.55145	8.91741	8.91299	9.4935	9.36648	9.518	9.58251	8.71561	8.88264	8.89068	8.98031
ENSGALG00010001512	8.02879	7.89639	7.93935	5.98447	4.72982	5.65301	5.82048	8.00381	7.5235	7.65177	7.67097	4.93989	5.65703	6.01221	5.81926
ENSGALG00010001513	9.28139	9.29907	9.32801	8.69341	9.30701	9.22015	9.07778	9.02216	9.13219	9.00866	8.89019	9.30254	9.45621	9.14852	8.9175
ENSGALG00010001514	9.43293	8.95033	9.6871	7.3791	7.55062	6.81817	7.29103	9.28992	9.09504	9.3142	9.26235	6.98775	7.21329	7.0996	7.84434
ENSGALG00010001516	2.36818	2.92771	2.36818	4.54354	4.72982	5.37583	3.58388	3.4062	2.36818	2.36818	2.36818	6.52872	4.72724	5.91692	4.71944
ENSGALG00010001517	11.3868	10.587	11.3456	8.45586	8.30672	8.27526	8.16786	11.0926	11.3754	10.7553	10.8459	8.06459	7.54211	7.85467	8.25332
ENSGALG00010001518	8.38625	8.50825	8.60707	8.22535	7.73688	7.90011	8.21268	8.68986	8.24974	8.52029	8.74284	7.72757	7.51384	8.317	8.39838
ENSGALG00010001520	5.27996	5.04927	5.88537	6.80987	6.88931	6.68213	7.63963	7.62296	7.15032	5.20028	6.56939	7.17191	6.40955	7.6637	8.01908
ENSGALG00010001521	9.04815	9.2496	8.55345	8.32767	8.13178	8.0495	8.35657	9.1552	8.4869	9.13216	9.01587	8.09293	8.88264	8.25384	8.56132
ENSGALG00010001523	2.36818	2.36818	2.36818	2.36818	2.36818	2.36818	2.36818	2.36818	3.53501	2.36818	2.36818	2.36818	2.36818	2.36818	2.36818
ENSGALG00010001524	2.36818	2.92771	2.36818	2.92738	2.36818	3.42463	2.36818	2.36818	2.9634	2.36818	2.36818	3.92692	3.20974	3.10226	2.36818
ENSGALG00010001525	16.6184	16.3779	16.4364	16.7619	16.8852	16.6816	16.751	16.2455	16.1348	16.6023	16.4798	16.8027	16.4588	16.7141	16.7967
ENSGALG00010001527	4.8127	3.59031	4.22895	5.96634	3.51578	5.69434	4.16268	4.7028	4.43087	5.59266	4.88636	5.1201	5.12356	5.45492	5.95148
ENSGALG00010001528	11.3317	11.2369	11.5143	10.6906	10.3741	10.7967	10.9833	11.2413	11.1006	11.0703	11.1622	10.477	10.1442	10.116	10.3564
ENSGALG00010001529	6.54204	6.80126	5.44737	8.09461	7.72519	7.589	7.02961	6.17529	6.68322	7.50955	7.48048	7.49243	6.79815	7.7759	7.03485
ENSGALG00010001531	4.44886	3.46747	2.36818	2.36818	3.19006	2.36818	2.36818	2.36818	2.36818	3.44602	3.42189	4.18175	2.36818	2.36818	3.53812
ENSGALG00010001532	16.4889	16.2149	16.299	16.6675	16.755	16.59	16.6478	16.1026	15.9819	16.5241	16.3666	16.6687	16.345	16.608	16.6837
ENSGALG00010001533	6.15736	6.10677	5.91203	11.328	12.7944	12.9646	12.1726	6.55064	6.02636	5.8042	6.83856	12.4657	11.7794	11.1773	11.3586
ENSGALG00010001534	6.15736	5.9494	5.372	4.25883	2.36818	4.12801	5.03752	6.03829	6.43752	5.61529	4.60553	4.805	2.36818	3.10226	2.96504
ENSGALG00010001535	8.84926	8.6134	8.73485	8.81162	8.55806	8.63178	8.86165	8.68986	8.54659	9.01077	9.09585	8.41255	8.26453	8.72359	8.95708
ENSGALG00010001536	2.91444	3.15467	3.79447	4.05065	3.19006	4.46906	4.16268	2.36818	3.77956	3.5667	2.90375	4.06115	2.36818	3.10226	4.55673
ENSGALG00010001537	4.28108	2.92771	3.49004	4.86017	4.62881	4.89186	5.3023	3.55874	3.66453	3.77145	3.42189	4.06115	4.67508	4.41755	4.71944
ENSGALG00010001538	2.91444	3.15467	2.36818	2.92738	2.36818	2.36818	2.36818	2.36818	2.36818	2.36818	2.36818	2.36818	2.36818	2.36818	2.36818
ENSGALG00010001540	8.75484	8.59591	8.77865	9.37112	9.50457	10.0649	9.81072	9.08775	8.85786	8.76015	9.10153	9.68637	9.73085	9.15199	9.42612
ENSGALG00010001541	5.16182	5.3622	5.372	5.41582	5.62577	5.21353	5.3497	5.19249	6.15897	6.08823	5.14909	5.00263	5.39997	5.15078	5.15261
ENSGALG00010001542	8.99406	9.42489	9.53794	8.74186	8.0684	8.62122	8.79164	9.23084	9.26353	9.35134	9.04171	8.59697	8.47338	8.77847	8.75936
ENSGALG00010001543	3.66965	2.92771	2.36818	2.36818	2.36818	3.12336	2.36818	2.36818	2.9634	2.91642	2.36818	2.36818	2.96741	2.36818	2.36818
ENSGALG00010001545	7.56385	8.32578	7.07534	5.94797	5.9433	6.28547	5.64299	7.75933	6.88206	7.08096	7.00167	5.97715	6.62361	5.66603	6.41459
ENSGALG00010001546	7.60331	7.67544	7.52475	7.21319	6.66241	7.02504	7.54261	7.67645	7.65062	7.36502	8.0101	7.00279	7.46298	7.08514	7.56571
ENSGALG00010001547	8.4981	8.30799	8.44889	8.48146	9.28727	9.1111	8.63582	8.63014	7.91865	8.46897	8.42706	9.52159	9.07622	9.33399	8.66374
ENSGALG00010001548	9.54712	9.39656	9.44134	8.95096	9.21806	9.31827	9.36263	9.08528	9.64871	9.06666	9.13516	8.98115	9.23825	9.02913	8.92551
ENSGALG00010001550	2.36818	2.36818	2.36818	4.25883	4.51944	3.98948	3.08366	2.97599	2.36818	2.36818	2.36818	3.59763	3.20974	2.36818	2.96504
ENSGALG00010001551	9.41404	9.05855	9.46834	9.34697	9.62269	9.25816	9.04629	9.06788	9.80495	9.87525	9.04565	9.5085	9.02458	9.15199	8.90946
ENSGALG00010001552	8.08561	7.94326	7.54181	7.68489	7.65295	7.77218	7.6858	8.15744	7.90261	7.93598	8.25075	7.84888	7.95864	8.23433	8.03397
ENSGALG00010001553	4.68767	4.25981	4.86318	4.49142	4.12108	3.83221	3.58388	4.75538	4.81225	5.006	4.30548	3.77479	3.98872	4.08302	4.61322
ENSGALG00010001554	7.01369	8.54517	6.13184	7.45217	6.3628	7.3149	6.83005	8.02458	8.30772	8.13118	7.5542	7.56506	7.36349	7.28812	7.73926
ENSGALG00010001556	8.38302	8.9365	8.21916	9.51437	8.76062	8.82374	9.55637	9.2353	8.31581	8.61497	9.39628	9.36777	9.57036	10.1	9.96042
ENSGALG00010001557	6.97119	7.11176	5.96389	8.00919	7.72519	7.89134	7.83255	7.30406	6.00637	7.04012	7.11853	7.34697	8.08888	8.11854	7.88868
ENSGALG00010001558	4.3395	3.59031	4.03167	4.05065	3.51578	3.42463	3.58388	4.01002	3.66453	3.5667	3.90973	4.18175	3.54258	3.10226	3.66794
ENSGALG00010001559	7.41336	7.49211	7.52475	7.74427	7.58985	7.95165	7.84887	7.22545	7.46643	7.39122	7.2266	7.59511	7.88331	7.3857	8.01409
ENSGALG00010001560	2.36818	2.36818	2.36818	2.36818	2.36818	3.12336	2.36818	2.36818	3.38526	3.77145	3.12136	2.36818	2.36818	2.36818	2.36818
ENSGALG00010001561	3.13622	4.05154	2.36818	3.15421	2.36818	2.36818	3.08366	3.4062	2.36818	2.91642	3.12136	2.36818	3.20974	3.10226	2.36818
ENSGALG00010001565	3.13622	3.88926	3.91923	2.36818	2.36818	2.36818	2.36818	3.4062	3.66453	3.77145	3.54014	2.36818	2.36818	2.36818	2.36818
ENSGALG00010001567	10.3058	9.93994	10.3349	10.1782	10.1345	9.80735	10.4116	10.0515	10.4063	9.93208	10.1587	10.0893	10.1671	9.8346	10.376
ENSGALG00010001569	2.36818	2.36818	2.36818	2.36818	2.36818	2.36818	2.36818	3.22162	2.36818	2.36818	2.36818	2.36818	2.36818	2.36818	2.36818
ENSGALG00010001570	10.0728	9.78009	10.1416	10.0853	9.91793	10.285	9.77914	9.49722	9.83905	10.6047	10.0956	10.1258	9.63245	9.98994	9.64705
ENSGALG00010001573	2.91444	2.36818	3.0266	2.36818	2.36818	2.36818	2.36818	2.97599	2.9634	3.5667	2.36818	2.36818	2.36818	2.36818	2.36818
ENSGALG00010001574	2.36818	2.36818	2.36818	3.46686	2.36818	3.12336	2.36818	2.36818	2.36818	2.36818	2.36818	2.36818	2.36818	3.10226	3.20646
ENSGALG00010001575	8.53353	8.8158	8.68968	8.27742	8.39791	8.30858	8.2924	8.60279	8.75147	8.8216	8.57327	8.26469	8.47338	8.52391	8.17492
ENSGALG00010001576	2.36818	2.92771	2.36818	2.36818	2.36818	2.36818	3.08366	2.36818	3.20418	2.36818	2.36818	3.09206	2.96741	2.36818	2.36818
ENSGALG00010001577	3.56255	2.92771	3.0266	3.32518	3.19006	4.2523	3.08366	3.4062	3.66453	3.94339	2.36818	3.09206	3.39194	3.10226	3.388
ENSGALG00010001578	2.36818	2.36818	2.36818	2.92738	3.19006	2.36818	2.36818	3.22162	2.36818	2.36818	2.90375	2.36818	2.36818	3.10226	2.36818
ENSGALG00010001579	2.36818	2.36818	2.36818	2.36818	2.36818	2.36818	2.36818	2.97599	2.36818	2.36818	2.36818	2.36818	3.54258	2.36818	3.20646
ENSGALG00010001580	2.36818	2.36818	2.36818	2.36818	2.36818	3.42463	3.08366	2.36818	2.36818	2.36818	2.90375	2.36818	2.36818	2.36818	2.36818
ENSGALG00010001581	3.93813	2.92771	2.36818	2.92738	3.19006	2.36818	2.36818	2.97599	2.9634	4.02051	4.24782	2.36818	3.78851	3.94737	2.96504
ENSGALG00010001583	2.91444	2.36818	3.0266	2.36818	2.36818	2.36818	2.36818	2.97599	2.9634	2.36818	2.36818	3.09206	2.36818	2.36818	2.36818
ENSGALG00010001584	3.30352	3.32572	3.29159	2.36818	3.19006	3.12336	3.37016	2.97599	2.36818	3.86072	2.90375	3.09206	2.96741	2.36818	2.36818
ENSGALG00010001585	9.69004	9.35904	9.42076	8.63189	7.8162	8.71861	8.43432	9.67844	9.70526	9.41173	9.60268	8.17476	7.67571	8.28576	8.16594
ENSGALG00010001586	8.03704	8.16507	8.08021	7.55826	7.56382	7.62119	8.18724	7.68299	8.14002	7.94485	8.09992	7.59511	8.07927	8.01567	7.7271
ENSGALG00010001587	3.30352	2.36818	4.13432	3.15421	3.19006	2.36818	3.37016	3.80759	4.49261	2.91642	3.28561	2.36818	2.96741	2.36818	2.96504
ENSGALG00010001588	4.92711	5.75134	5.20783	4.77709	4.40004	3.98948	4.70903	5.46377	6.61908	4.77952	6.13754	5.1201	5.26862	4.68241	4.95316
ENSGALG00010001589	2.36818	2.36818	2.36818	3.58963	2.36818	2.36818	3.08366	2.36818	2.36818	2.36818	2.36818	3.3817	3.20974	2.36818	2.96504
ENSGALG00010001590	6.35597	5.66365	6.26156	5.51964	5.9433	6.08367	5.68031	5.30049	6.2803	6.75721	6.12264	4.805	6.1393	5.49975	6.05299
ENSGALG00010001592	2.36818	2.36818	2.36818	2.36818	2.36818	2.36818	2.36818	2.36818	2.36818	2.36818	3.42189	3.09206	2.36818	2.36818	2.36818
ENSGALG00010001593	2.36818	3.59031	2.36818	3.97238	4.26834	4.12801	4.37175	2.97599	2.9634	2.36818	2.36818	3.3817	3.98872	4.20483	3.66794
ENSGALG00010001594	4.3395	3.59031	3.29159	3.46686	3.51578	3.98948	3.91005	2.97599	2.36818	3.44602	3.54014	3.09206	4.15947	4.08302	4.07099
ENSGALG00010001595	2.91444	2.36818	3.0266	3.15421	2.36818	3.83221	3.08366	2.36818	2.9634	3.13898	2.90375	3.09206	3.39194	3.10226	2.96504
ENSGALG00010001597	3.76668	2.36818	3.0266	2.36818	3.19006	3.12336	2.36818	2.36818	3.20418	2.91642	2.36818	2.36818	2.36818	2.36818	2.36818
ENSGALG00010001598	2.36818	2.36818	2.36818	2.36818	3.19006	2.36818	2.36818	2.97599	2.36818	3.77145	3.42189	2.36818	2.36818	3.10226	2.36818
ENSGALG00010001599	10.7245	10.6155	10.4398	10.5809	10.5925	10.393	10.6373	10.6495	10.2237	10.5382	10.7617	10.614	11.191	10.779	10.7144
ENSGALG00010001600	3.8557	3.97323	4.54913	2.92738	4.62881	4.36529	3.08366	3.55874	4.49261	3.44602	3.64546	3.3817	2.96741	3.10226	3.388
ENSGALG00010001604	5.92656	4.43816	5.25072	2.36818	2.36818	2.36818	2.36818	5.15453	5.76561	5.31613	4.69196	2.36818	2.96741	2.36818	2.36818
ENSGALG00010001605	9.7427	9.18674	9.7816	9.62757	9.53836	9.7933	9.27781	9.37523	9.89819	10.0972	9.60934	9.6653	9.05676	9.44276	9.24828
ENSGALG00010001606	8.23301	8.55124	8.4534	8.79896	8.62878	8.92172	9.00321	8.56785	7.86999	7.98409	8.45987	8.39558	8.45492	7.81144	8.73529
ENSGALG00010001609	2.36818	2.36818	2.36818	2.36818	2.36818	3.12336	2.36818	2.97599	3.20418	2.36818	3.12136	2.36818	2.36818	2.36818	2.36818
ENSGALG00010001611	7.65252	7.69201	7.144	6.49418	7.08522	6.7806	6.76262	7.5815	7.46643	8.03895	7.7837	6.91013	6.75041	7.3857	6.63943
ENSGALG00010001612	3.93813	3.59031	3.29159	3.58963	3.51578	4.2523	2.36818	4.46873	4.55155	4.09288	5.62554	3.59763	3.54258	4.08302	3.53812
ENSGALG00010001614	3.13622	4.38145	3.79447	2.92738	2.36818	3.83221	3.37016	4.09937	4.85881	2.91642	4.56009	3.09206	2.96741	2.36818	2.36818
ENSGALG00010001616	3.56255	3.97323	3.65355	3.15421	2.36818	3.12336	2.36818	2.97599	3.38526	2.91642	3.12136	2.36818	2.96741	3.79355	3.53812
ENSGALG00010001617	10.1847	10.0065	10.4477	10.2024	10.6554	11.1361	10.199	10.1326	10.3815	10.5079	9.9095	10.7865	10.0673	10.477	10.1304
ENSGALG00010001618	4.39535	4.68966	3.65355	3.15421	2.36818	3.64872	4.27158	4.33372	5.35299	3.5667	4.73316	2.36818	2.36818	2.36818	2.36818
ENSGALG00010001619	3.44225	3.15467	4.13432	2.36818	2.36818	2.36818	2.36818	4.7028	4.06671	3.94339	4.12376	2.36818	2.36818	2.36818	2.36818
ENSGALG00010001620	9.74144	9.81829	9.3952	10.952	11.8584	12.006	11.4536	9.73307	9.04722	9.2584	9.57163	11.7376	11.5152	11.1739	11.2608
ENSGALG00010001621	4.21979	3.15467	3.0266	4.68853	3.19006	4.6546	5.14958	3.80759	2.9634	2.91642	3.54014	3.3817	3.67284	3.10226	4.66739
ENSGALG00010001622	3.66965	2.36818	3.0266	2.36818	2.36818	2.36818	2.36818	2.36818	2.9634	2.91642	2.90375	2.36818	2.36818	2.36818	2.36818
ENSGALG00010001624	2.36818	2.36818	2.36818	2.36818	2.36818	2.36818	2.36818	2.97599	2.9634	3.67413	2.36818	2.36818	2.36818	2.36818	2.36818
ENSGALG00010001627	9.27965	9.10256	9.50138	9.30458	9.33034	9.45842	9.11872	9.18086	9.25724	9.49405	9.11658	9.45494	9.06895	9.33399	9.07926
ENSGALG00010001628	8.38302	8.16111	8.85564	8.70703	8.8332	8.86014	9.15853	7.696	7.49525	8.37371	7.73576	8.53119	8.80023	8.50233	9.60615
ENSGALG00010001629	2.36818	3.46747	3.0266	2.36818	2.36818	2.36818	3.08366	2.97599	2.36818	2.36818	2.36818	2.36818	2.36818	3.10226	2.36818
ENSGALG00010001632	5.4653	5.18303	5.02159	6.73721	5.28184	7.42844	7.07198	4.90181	4.98961	5.006	5.58236	6.64841	6.63681	5.70471	7.59278
ENSGALG00010001633	7.81018	7.5233	7.98369	8.97368	9.37591	9.0013	8.70018	7.50225	7.77332	7.47934	7.75993	9.54741	9.35831	9.34918	8.58846
ENSGALG00010001635	7.14183	6.84147	7.35177	7.10196	7.24128	7.32797	6.84642	7.18909	6.95656	7.44849	7.26089	7.2621	6.10162	6.97964	6.70303
ENSGALG00010001636	2.36818	2.36818	2.36818	2.36818	3.19006	3.12336	2.36818	2.36818	2.36818	3.13898	2.36818	2.36818	2.36818	4.08302	2.36818
ENSGALG00010001639	9.73638	9.91195	9.7099	8.01358	8.66595	8.74805	8.00266	9.51016	9.78614	9.75063	9.58657	8.04296	7.88882	7.11392	7.39936
ENSGALG00010001640	8.53645	8.77494	8.69731	8.24789	8.22605	8.54499	8.37922	8.61995	8.67171	8.85019	8.61889	8.28939	8.3389	8.24086	8.45477
ENSGALG00010001642	7.82456	7.86752	8.23497	7.82148	7.92243	8.13372	7.99534	7.62296	9.04235	8.36382	8.03803	8.49449	8.3589	8.42989	7.18479
ENSGALG00010001647	7.97394	7.54778	8.08603	7.3859	6.02235	6.38916	7.25472	8.22179	7.70096	7.02345	6.66484	6.7765	5.63068	6.47966	7.40701
ENSGALG00010001648	4.15531	3.88926	3.79447	4.49142	4.62881	4.73844	5.14958	4.09937	3.38526	3.44602	3.82855	4.57328	4.44297	5.15078	4.71944
ENSGALG00010001649	5.90855	6.07327	6.13184	7.00809	6.1684	6.23066	6.32155	5.58196	6.08471	6.53981	5.68794	6.25439	6.12058	6.70472	6.65238
ENSGALG00010001652	3.44225	3.46747	3.65355	3.88844	3.19006	4.46906	5.48295	3.4062	2.9634	2.36818	2.36818	4.73215	3.89304	4.68241	4.95316
ENSGALG00010001653	2.36818	3.15467	2.36818	2.92738	2.36818	3.83221	2.36818	2.36818	2.36818	2.36818	3.64546	2.36818	2.96741	3.10226	3.53812
ENSGALG00010001654	12.6704	12.4923	12.7205	13.0867	13.3154	13.0662	12.9668	12.3701	12.6007	12.8841	12.8617	13.2162	12.8673	13.0926	12.9654
ENSGALG00010001656	2.36818	3.46747	2.36818	3.58963	3.95331	3.64872	3.75932	2.36818	2.36818	3.30684	2.36818	2.36818	3.67284	3.79355	2.36818
ENSGALG00010001657	8.64573	8.8942	8.65877	9.902	10.4201	10.2112	9.80655	8.86986	8.93083	8.75512	8.9669	10.7211	10.5563	10.4235	9.59449
ENSGALG00010001660	2.36818	2.92771	2.36818	3.46686	3.95331	3.12336	3.08366	2.36818	2.36818	2.91642	4.46419	3.92692	2.96741	3.39571	4.49769
ENSGALG00010001661	9.61484	9.34166	9.80473	9.24979	9.45589	9.02153	9.03564	9.22188	9.61631	9.20775	9.13885	9.6747	9.19664	9.29688	8.96486
ENSGALG00010001662	4.39535	3.88926	3.49004	2.36818	2.36818	4.12801	2.36818	3.4062	4.36601	3.77145	3.12136	3.09206	2.96741	2.36818	3.20646
ENSGALG00010001664	4.3395	5.21454	4.74626	7.9554	8.97321	9.12238	8.25002	4.7028	3.38526	4.65021	6.07696	9.10108	8.81478	9.0737	7.80438
ENSGALG00010001665	3.13622	3.88926	2.36818	2.92738	2.36818	2.36818	3.37016	2.36818	3.20418	2.91642	2.36818	3.09206	2.36818	2.36818	2.96504
ENSGALG00010001666	8.35688	8.13713	7.60808	7.62297	7.38206	6.48584	7.27902	8.77196	7.62478	8.11556	7.9229	7.56506	6.77448	7.43212	7.59278
ENSGALG00010001667	2.36818	3.69959	2.36818	4.25883	5.77064	6.33825	3.08366	2.97599	2.36818	3.44602	3.12136	4.18175	4.15947	4.96936	4.07099
ENSGALG00010001668	8.86557	8.73555	8.70111	9.36598	9.08719	9.36968	9.50067	8.65032	8.70907	8.95263	8.63987	8.98871	9.14921	8.97924	9.45404
ENSGALG00010001670	2.36818	2.36818	3.79447	2.36818	2.36818	2.36818	2.36818	3.4062	2.36818	2.36818	2.36818	2.36818	2.36818	2.36818	2.96504
ENSGALG00010001671	3.93813	4.68966	4.31686	2.92738	2.36818	2.36818	3.08366	3.55874	4.06671	3.86072	4.30548	3.09206	2.36818	2.36818	2.36818
ENSGALG00010001672	4.44886	4.125	4.74626	5.5688	4.26834	4.89186	5.03752	4.403	5.21885	5.54626	4.99087	4.65509	4.67508	5.40861	4.61322
ENSGALG00010001673	2.36818	2.36818	3.0266	2.92738	3.19006	2.36818	2.36818	2.36818	2.36818	2.36818	2.36818	3.3817	3.20974	2.36818	2.96504
ENSGALG00010001674	8.96408	9.03927	9.04686	9.13556	9.37591	9.63687	9.08813	9.09513	9.19278	9.41492	8.98955	9.57529	9.06652	9.17944	8.81211
ENSGALG00010001675	3.56255	3.79854	3.65355	6.00237	4.82372	5.98762	6.24933	3.9133	4.2254	4.40176	3.64546	5.00263	5.6829	6.74211	5.79597
ENSGALG00010001677	7.88527	8.06692	6.97836	7.84633	7.94277	8.57815	8.41253	8.09499	7.83097	7.33834	7.98572	8.81676	7.69473	8.26669	8.04381
ENSGALG00010001678	9.80806	10.0828	9.76174	10.1039	10.0896	10.3328	10.3992	9.74093	9.90626	9.59604	9.73285	9.94135	10.1257	9.42853	10.4619
ENSGALG00010001679	3.30352	4.05154	3.0266	5.77103	5.34535	5.8846	5.03752	3.80759	3.77956	3.44602	4.18736	4.805	5.52005	6.29047	5.35927
ENSGALG00010001680	4.50023	3.15467	3.29159	3.69886	6.2689	5.26976	5.14958	4.09937	4.2254	4.02051	3.64546	5.1201	5.12356	4.90312	6.09165
ENSGALG00010001681	10.3437	10.9809	10.6019	9.69201	9.90762	9.83733	9.86987	10.4596	10.4685	10.2999	10.0434	9.47121	9.78947	9.6918	9.92094
ENSGALG00010001682	3.76668	2.92771	3.49004	2.92738	2.36818	2.36818	2.36818	2.36818	2.9634	2.91642	3.54014	2.36818	2.96741	2.36818	3.20646
ENSGALG00010001684	2.36818	2.92771	3.0266	2.36818	2.36818	2.36818	2.36818	2.36818	2.36818	2.91642	2.36818	3.09206	2.36818	2.36818	2.36818
ENSGALG00010001685	2.36818	2.92771	2.36818	2.36818	2.36818	2.36818	2.36818	3.55874	2.36818	2.36818	2.36818	2.36818	2.36818	2.36818	2.36818
ENSGALG00010001686	10.2177	10.3416	10.3102	10.8678	11.6101	11.4485	11.1726	10.0578	10.135	10.0832	10.0484	11.7348	11.4181	11.3427	10.6603
ENSGALG00010001688	5.38885	4.68966	5.55334	5.14952	6.33218	6.43831	5.3497	5.33471	5.41552	5.04035	7.2266	6.44299	5.00381	5.9494	6.59987
ENSGALG00010001689	11.4372	10.9078	11.7639	10.2044	10.1844	10.6089	10.1749	11.2568	12.0324	11.5358	11.2437	10.5115	10.2335	10.2929	9.93422
ENSGALG00010001691	8.51001	7.63604	8.12615	7.28041	8.31454	7.90011	7.51218	8.06524	7.61824	8.14278	7.10348	7.40467	7.50668	7.92124	7.70866
ENSGALG00010001692	8.82801	9.6134	8.7049	11.3851	12.2988	12.3077	11.6161	9.35283	9.11837	9.03381	10.1937	12.0446	11.7049	11.8504	11.4203
ENSGALG00010001693	9.9492	9.73287	9.70234	10.7628	10.4453	10.3899	10.2734	9.44812	9.75671	10.1451	10.0025	10.6561	9.97836	10.182	10.5229
ENSGALG00010001694	4.54966	5.18303	6.32226	4.89987	7.12139	4.46906	5.03752	4.80598	4.85881	4.73779	4.12376	5.00263	5.65703	4.08302	3.98283
ENSGALG00010001695	2.36818	2.36818	2.36818	2.36818	3.19006	3.12336	2.36818	3.22162	2.36818	2.36818	2.36818	3.09206	2.36818	2.36818	2.36818
ENSGALG00010001696	9.89915	10.1847	10.0493	10.0842	10.9077	10.5179	10.6572	9.69472	9.53543	9.78188	9.84322	11.0629	10.9612	10.7689	10.3885
ENSGALG00010001697	7.64173	7.42762	8.34589	8.09875	7.92243	7.74322	7.92781	7.24329	8.60722	7.87234	7.48628	8.45683	7.71349	8.11143	7.53813
ENSGALG00010001698	13.1049	12.761	13.1115	13.5042	13.5466	13.4591	13.4456	12.6652	12.9249	13.2487	13.013	13.6181	13.0407	13.3231	13.4459
ENSGALG00010001699	3.13622	3.15467	2.36818	2.92738	2.36818	2.36818	2.36818	2.36818	2.9634	2.36818	3.28561	2.36818	3.20974	2.36818	2.36818
ENSGALG00010001700	5.16182	5.08394	5.65189	4.59366	5.40609	3.42463	2.36818	5.07535	4.60795	5.16974	5.11886	5.78055	4.07714	3.39571	3.88744
ENSGALG00010001701	9.24445	9.10049	9.17529	9.24607	9.88679	9.82126	9.41287	9.2552	9.44423	8.96139	8.98546	9.79598	9.78061	9.71777	9.32691
ENSGALG00010001702	10.6308	10.5436	10.7076	10.6203	10.9371	10.4389	10.7951	10.574	10.3053	10.4646	10.5474	10.8134	11.3057	11.3434	10.839
ENSGALG00010001704	8.90894	9.0241	8.96077	8.69341	9.2793	9.0175	8.37922	8.9453	8.65904	8.98307	8.92051	9.01856	8.74356	8.94367	8.23626
ENSGALG00010001705	12.0258	12.6436	12.5319	10.8696	11.6708	10.7307	10.6698	12.659	12.6949	12.974	13.6125	10.8809	10.875	10.6983	10.804
ENSGALG00010001706	5.58413	6.49569	5.33273	3.88844	4.51944	4.2523	3.08366	5.95366	5.53279	5.91746	5.26378	4.73215	4.15947	4.31567	4.55673
ENSGALG00010001707	2.36818	3.97323	3.79447	4.25883	6.13327	5.15493	3.91005	2.97599	4.71401	4.28722	3.74093	6.03708	4.30919	4.59993	4.76954
ENSGALG00010001708	9.11983	8.69506	8.90588	8.21775	7.28975	7.63176	7.21747	8.76581	8.95176	9.42762	8.99973	7.13145	6.76249	5.84965	7.61935
ENSGALG00010001709	10.9072	11.2799	11.1231	11.1131	12.4542	11.3742	11.3283	10.3732	11.5425	11.3291	10.8543	11.4118	11.4672	9.83027	10.9717
ENSGALG00010001710	8.10929	7.96158	8.2915	8.24416	8.78897	8.37928	8.41801	7.91761	8.17159	8.09976	8.10747	8.59697	8.67823	7.82019	8.53367
ENSGALG00010001711	7.49357	7.09524	8.23497	4.43712	4.26834	3.64872	4.91549	7.96135	5.69219	6.59733	6.74465	4.18175	5.0449	4.08302	4.55673
ENSGALG00010001712	10.1547	10.2873	9.96494	10.5026	10.3266	10.5405	10.4361	10.4002	9.50744	9.98567	10.7149	9.94718	10.1817	10.307	10.1758
ENSGALG00010001713	4.99836	6.61658	5.58696	8.43309	10.2953	10.476	9.86386	5.66451	5.85795	5.16974	5.344	10.5323	9.74611	10.1424	8.90946
ENSGALG00010001714	6.58783	7.0701	5.11785	3.15421	3.95331	3.12336	4.27158	5.03398	4.90382	6.58601	5.31777	3.09206	4.07714	3.10226	3.20646
ENSGALG00010001715	2.91444	2.92771	3.49004	2.36818	2.36818	2.36818	3.08366	2.36818	2.36818	3.44602	3.90973	2.36818	3.20974	3.79355	2.36818
ENSGALG00010001716	7.85757	8.10451	7.47234	9.34697	8.25886	8.99722	9.39631	8.47662	7.70096	8.00967	8.1037	9.51375	9.01705	10.1053	9.32892
ENSGALG00010001717	3.44225	3.88926	3.91923	4.64195	3.51578	3.98948	4.46461	4.59096	3.97873	3.5667	3.64546	3.92692	3.54258	4.08302	3.98283
ENSGALG00010001721	6.47048	6.58137	6.5251	11.5026	13.26	13.2735	12.4236	7.1612	6.84891	6.39157	7.82093	12.9209	11.584	11.6974	11.7173
ENSGALG00010001725	8.64573	8.62494	9.06466	10.1485	9.55826	9.56701	9.72051	9.06538	9.01527	8.95921	8.84574	9.82372	9.94569	9.83891	9.77949
ENSGALG00010001726	2.91444	2.92771	3.0266	3.46686	5.40609	4.36529	4.0431	2.97599	3.53501	2.91642	4.46419	3.77479	2.96741	3.79355	4.07099
ENSGALG00010001727	3.66965	3.15467	3.0266	3.69886	3.19006	3.42463	4.0431	3.9133	4.29767	3.13898	2.36818	4.18175	2.96741	4.08302	2.96504
ENSGALG00010001728	7.08717	7.56587	6.83335	6.7688	6.23618	7.39158	6.81348	7.65662	6.68322	7.25518	7.04169	6.22897	6.44001	6.58636	6.69053
ENSGALG00010001729	10.5284	12.0645	11.3224	6.20132	5.67573	5.77353	6.74525	11.3548	11.2288	10.4232	10.2764	7.08983	6.54178	7.34988	6.53141
ENSGALG00010001731	6.2315	6.37742	6.39938	6.78948	6.8028	6.95933	6.51863	5.19249	6.02636	6.5631	5.99743	6.98775	6.80984	6.54462	6.3682
ENSGALG00010001732	7.36168	7.16814	7.18803	7.80637	7.58985	7.9175	7.49154	6.80036	7.50945	7.65718	7.2541	7.59511	7.20447	7.46598	6.8563
ENSGALG00010001737	7.65788	7.50467	7.59996	7.89477	9.45235	9.40398	8.26834	7.08408	7.54434	7.79598	7.20562	9.48464	8.34292	8.89482	8.28684
ENSGALG00010001738	6.82606	6.85134	6.36134	7.00809	6.30089	6.92532	7.80771	7.01304	6.68322	6.64173	7.03377	7.14506	6.83294	7.22359	7.22862
ENSGALG00010001740	2.36818	3.32572	2.36818	2.36818	2.36818	2.36818	2.36818	2.36818	2.36818	2.36818	2.36818	2.36818	2.36818	2.36818	2.36818
ENSGALG00010001741	6.67525	7.31803	6.67205	9.19671	9.69638	9.6577	9.04275	6.53621	6.73254	6.80678	7.38423	10.1377	10.295	9.66777	9.17634
ENSGALG00010001743	2.36818	3.32572	4.39904	3.32518	5.57398	3.42463	4.63249	4.09937	5.03056	3.5667	4.99087	5.22836	4.50497	4.59993	4.07099
ENSGALG00010001744	3.44225	2.92771	2.36818	3.58963	3.19006	3.83221	2.36818	2.97599	3.38526	2.91642	3.28561	2.36818	3.98872	2.36818	2.36818
ENSGALG00010001745	6.90949	6.74936	5.98913	6.92646	4.91152	6.76144	5.82048	6.46181	7.4881	5.8042	6.15229	4.87412	5.30264	5.40861	6.81086
ENSGALG00010001748	2.36818	2.36818	2.36818	2.36818	2.36818	2.36818	2.36818	2.36818	3.53501	2.36818	2.36818	2.36818	2.36818	2.36818	2.36818
ENSGALG00010001749	11.5391	11.4838	11.2747	10.5034	10.6431	10.56	11.043	11.0815	11.2116	11.2451	11.2805	10.4729	10.8847	10.672	10.7366
ENSGALG00010001751	4.99836	4.73469	5.48359	6.92646	6.09725	5.77353	6.72768	5.11551	4.81225	5.006	5.02401	5.51026	4.96145	5.09292	6.3524
ENSGALG00010001752	9.90141	9.58561	9.55693	8.87092	8.88666	8.65787	8.79164	9.67023	9.81783	9.86595	9.71443	8.67401	8.81478	8.58677	8.84904
ENSGALG00010001753	9.63129	9.71138	9.44361	10.3018	10.2409	10.2165	10.0215	9.56078	9.29867	9.36791	9.56067	10.655	10.4762	9.79078	10.0667
ENSGALG00010001754	10.507	10.7428	10.1652	10.1345	9.22223	8.89565	9.99057	10.049	10.2313	10.6783	10.1257	9.5853	9.48014	9.64826	10.4125
ENSGALG00010001755	2.36818	3.69959	3.0266	3.15421	4.51944	2.36818	2.36818	2.97599	3.88354	2.91642	4.24782	4.29153	3.67284	3.79355	2.36818
ENSGALG00010001756	7.426	8.52991	5.77344	7.02562	6.06029	6.92532	7.5019	7.67645	8.73043	7.81545	6.96884	6.89409	7.11314	6.74211	6.88947
ENSGALG00010001758	7.49357	7.0701	7.0517	3.46686	3.51578	3.12336	4.46461	8.31324	7.33708	7.24802	7.12599	3.09206	3.39194	4.51193	3.78323
ENSGALG00010001759	7.95228	7.99311	8.28139	8.24416	8.01178	7.83756	8.18081	8.15744	8.42837	7.86301	8.01413	7.95306	8.26453	8.23433	7.95275
ENSGALG00010001760	10.1921	10.2699	10.3747	10.4199	10.8183	10.9343	10.7545	10.2364	9.96405	10.1364	10.134	10.7268	10.4862	10.5219	10.4756
ENSGALG00010001761	9.38038	8.85063	9.21302	9.62757	10.0526	9.71844	9.51096	9.2486	9.23607	9.41811	9.23848	10.2187	9.10017	9.81723	9.21167
ENSGALG00010001763	6.44582	7.10353	5.11785	5.91051	5.57398	5.8846	6.17327	6.19383	6.31316	6.43009	6.87447	6.37514	5.82891	6.36438	6.3682
ENSGALG00010001764	6.61019	7.65306	7.23074	6.50673	7.33664	7.70368	6.69186	6.30029	6.39214	7.07288	7.24727	7.58516	7.485	6.86577	7.15784
ENSGALG00010001766	2.36818	2.36818	3.0266	2.36818	2.36818	3.12336	2.36818	2.97599	3.20418	2.91642	2.90375	2.36818	2.96741	2.36818	2.36818
ENSGALG00010001767	6.90949	6.58137	7.13278	7.13462	7.0292	6.36393	6.32155	7.32095	7.13208	6.84523	6.76393	6.97256	7.05542	6.91568	6.99479
ENSGALG00010001770	7.407	7.28199	8.28139	7.63443	7.91215	8.24116	8.00993	7.08408	7.42209	7.20435	7.62959	7.80672	7.13187	7.59397	7.59278
ENSGALG00010001771	7.91693	8.23454	8.21916	8.04826	8.12289	8.18485	8.14161	8.55364	8.67487	8.68543	8.40884	8.36105	7.76837	8.42416	8.50903
ENSGALG00010001773	9.68873	9.93763	9.00446	8.93946	8.0309	7.93468	8.72691	8.63353	8.89075	9.09481	9.3073	8.87094	9.6126	9.1896	9.48866
ENSGALG00010001774	3.76668	3.69959	4.03167	3.15421	3.19006	4.89186	3.37016	3.4062	4.81225	4.73779	4.12376	3.3817	2.36818	2.36818	3.20646
ENSGALG00010001776	9.58701	9.5253	9.32801	8.88537	8.92293	9.04544	8.78318	9.29633	8.83551	9.488	9.10531	8.821	8.7617	8.80955	8.76234
ENSGALG00010001778	9.89689	10.377	9.90033	9.44939	10.0941	10.5475	10.0465	10.2241	9.55779	9.99317	9.62389	10.2723	10.3649	10.2138	9.8831
ENSGALG00010001779	5.27996	5.11777	4.31686	4.77709	4.62881	4.46906	4.0431	6.03829	6.93566	6.63076	6.13754	4.73215	5.52005	4.31567	3.78323
ENSGALG00010001780	9.1992	9.24212	9.83961	6.82997	5.40609	6.41395	7.26692	9.44234	9.37426	9.33962	8.28778	7.21125	6.36262	7.74866	6.4447
ENSGALG00010001783	4.15531	6.18723	5.98913	6.51918	5.67573	5.84854	6.87862	6.0176	6.45233	6.0054	7.07292	6.32806	6.88912	6.94802	6.88947
ENSGALG00010001784	6.81648	6.77035	7.64011	4.77709	4.40004	3.98948	5.88569	7.29553	7.54434	7.51552	6.19565	5.3764	4.30919	5.15078	4.86446
ENSGALG00010001785	9.9601	10.1847	9.61445	7.97806	6.23618	7.17725	7.92781	9.98687	9.25514	9.99744	8.79521	7.07568	6.75041	7.64412	8.46944
ENSGALG00010001786	7.65788	8.37447	7.59179	6.54375	6.45092	7.13326	7.02961	8.07522	7.18613	8.15429	8.36226	6.1225	6.10162	6.50164	6.964
ENSGALG00010001788	4.28108	4.05154	4.39904	5.24406	4.62881	3.42463	4.0431	4.33372	4.60795	4.55642	4.9221	4.65509	5.30264	4.68241	5.32688
ENSGALG00010001790	7.02204	6.88058	7.32245	6.99035	6.75752	6.02036	7.62075	6.84783	7.92396	7.07288	6.82027	6.9572	7.36349	6.81407	6.91116
ENSGALG00010001793	9.50758	9.7593	9.44361	9.15954	9.2097	9.22015	9.53132	9.46531	9.12068	9.31248	9.15716	9.10108	9.49105	9.25878	9.42799
ENSGALG00010001794	3.13622	2.36818	3.0266	4.05065	2.36818	2.36818	2.36818	3.69057	2.9634	2.36818	2.36818	3.09206	2.36818	3.10226	3.20646
ENSGALG00010001795	5.03265	6.89019	3.91923	5.61631	4.72982	5.73449	4.97787	6.93829	6.69571	7.05659	6.01369	4.39248	4.82584	4.20483	4.61322
ENSGALG00010001796	9.73385	9.4543	9.72304	7.33763	7.22475	7.74322	6.94093	9.20379	9.92886	9.87061	9.66284	6.60961	5.94007	7.08514	6.27066
ENSGALG00010001797	4.28108	4.38145	4.68375	4.32109	4.12108	5.37583	3.08366	4.7028	4.2254	5.07385	4.24782	4.06115	3.39194	4.20483	4.22999
ENSGALG00010001798	6.98834	7.27468	7.144	7.49051	8.00212	7.96006	7.27902	7.00259	7.64421	7.86301	7.19856	7.66286	7.69473	7.73946	7.00491
ENSGALG00010001800	6.62124	7.01845	7.59996	7.19007	6.82492	6.90801	6.84642	7.0234	7.65701	7.69447	7.28108	6.97256	7.29866	7.24975	6.78759
ENSGALG00010001801	8.90443	8.25697	8.22445	8.40327	8.32232	7.80056	8.59771	8.3466	8.82987	8.58976	7.93992	8.38989	9.0738	8.70482	8.78304
ENSGALG00010001803	10.1094	9.78267	10.1569	10.3399	10.4735	10.3553	10.347	10.1362	9.96534	9.67673	9.98829	10.4025	10.6123	10.2287	10.2908
ENSGALG00010001805	5.75561	5.47003	5.44737	6.15413	6.09725	5.77353	5.64299	5.5241	5.61474	6.32496	5.93044	5.22836	5.30264	5.77903	6.12929
ENSGALG00010001807	7.72074	7.67544	7.46341	7.8659	7.64055	7.2884	7.73053	7.49483	7.49525	7.59656	7.57615	7.18514	7.41792	7.68302	7.75731
ENSGALG00010001808	7.88527	7.33922	7.81161	7.89477	7.55062	7.5781	7.73932	7.72802	8.03603	7.52146	7.33358	8.14799	8.55538	8.48043	7.68998
ENSGALG00010001810	5.16182	5.305	5.85821	6.70491	5.67573	6.33825	5.94804	5.30049	5.76561	5.16974	6.2515	6.42073	4.77745	5.49975	5.42186
ENSGALG00010001811	8.97056	8.67577	8.6391	8.34172	8.21773	8.18485	8.77039	9.14101	9.09739	8.66679	8.90326	7.84055	8.42108	8.58677	8.66693
ENSGALG00010001813	8.08162	7.63032	7.68685	6.99925	7.48277	6.97604	7.39477	7.72802	7.76151	7.27642	7.37799	7.58516	8.08888	7.59397	7.61275
ENSGALG00010001816	2.36818	2.36818	2.36818	2.92738	2.36818	2.36818	2.36818	2.97599	2.9634	3.13898	3.28561	2.36818	2.36818	2.36818	2.36818
ENSGALG00010001817	13.4832	13.1705	13.3428	13.4815	14.0269	13.7609	13.556	13.2838	13.0179	13.4735	13.6555	13.7511	13.3841	13.8285	13.471
ENSGALG00010001818	4.08723	4.32209	4.68375	3.46686	4.40004	3.83221	3.75932	4.01002	4.55155	4.02051	4.12376	3.3817	3.20974	3.79355	4.49769
ENSGALG00010001819	6.94507	6.1395	6.39938	6.29129	5.62577	5.47442	6.32155	6.38332	6.6059	6.28346	6.26512	5.97715	7.30693	7.21033	6.21927
ENSGALG00010001820	7.11866	7.3807	6.83335	5.14952	5.07177	5.73449	5.25323	7.12316	6.17695	7.31799	6.80173	5.00263	4.37784	5.15078	4.15308
ENSGALG00010001822	7.98679	7.79782	7.75424	5.89141	6.02235	5.37583	4.70903	6.83611	8.16712	8.4473	8.55682	5.84915	4.15947	4.41755	4.43584
ENSGALG00010001823	12.2292	12.2576	12.3552	11.5166	11.737	11.7712	11.7056	12.3255	12.0922	12.2663	11.8837	11.616	11.9007	11.3019	11.8675
ENSGALG00010001825	7.17216	6.99191	6.47256	6.42969	5.9433	6.53184	6.12021	6.1565	7.08543	7.06476	7.20562	6.17673	6.0824	6.62691	6.7277
ENSGALG00010001826	9.39811	9.04787	8.96393	8.41328	8.29094	8.39797	8.52342	9.19924	9.43311	9.23511	9.11471	8.12759	8.54843	8.22777	8.49476
ENSGALG00010001827	7.31489	7.98865	8.03276	8.83166	7.06679	8.66817	8.37359	9.0144	8.82421	6.22618	4.73316	8.14799	8.21711	6.18558	8.68589
ENSGALG00010001828	2.36818	2.36818	3.0266	2.36818	2.36818	3.42463	3.08366	2.36818	2.36818	2.36818	3.12136	2.36818	2.36818	3.10226	3.78323
ENSGALG00010001829	9.01092	9.11898	8.67044	8.09461	7.64055	7.80056	8.33357	8.73465	8.69673	8.9766	8.9481	7.69095	8.3389	8.18778	8.01908
ENSGALG00010001831	7.66855	7.66429	7.61615	6.54375	6.50679	6.81817	6.32155	8.23966	6.72037	7.93598	7.91	6.14987	5.82891	6.1301	6.09165
ENSGALG00010001832	9.42823	9.64916	9.48825	9.77454	9.89464	9.70099	9.57365	9.81281	9.67883	9.43393	9.73772	9.75668	10.0527	9.75245	9.80718
ENSGALG00010001834	8.40869	8.31869	8.32635	8.06951	8.36061	8.26172	8.16134	8.148	8.20684	8.14663	7.98981	8.16811	8.36286	7.63423	8.08726
ENSGALG00010001835	8.30314	7.68099	7.9329	8.29196	8.25073	7.92611	8.21268	7.99857	8.07472	8.19202	8.21973	8.25845	7.67571	8.04582	8.10617
ENSGALG00010001836	10.3594	10.4273	10.4922	10.7117	10.5989	10.5955	10.6733	10.6088	10.3235	10.2826	10.4416	10.5894	10.9579	10.7484	10.8083
ENSGALG00010001837	9.13337	9.46237	9.11108	8.85877	9.61953	9.50802	9.53636	9.33216	8.80133	9.03381	9.36355	9.9433	9.87942	9.60083	9.12862
ENSGALG00010001838	8.44326	8.28271	8.26608	8.20244	7.9924	7.9175	8.08073	8.52478	8.16712	8.0717	7.9775	8.25218	8.32677	8.08264	8.13866
ENSGALG00010001839	6.47048	6.12323	6.10902	5.5688	4.99399	5.37583	4.63249	6.77603	5.90196	6.5746	6.8921	4.57328	4.07714	4.59993	4.90953
ENSGALG00010001840	8.85627	8.38808	8.647	8.82917	7.39688	7.75294	8.45045	8.66362	9.46621	8.69597	8.72577	8.07883	8.05004	8.48593	8.55102
ENSGALG00010001842	3.13622	3.15467	2.36818	2.36818	2.36818	2.36818	2.36818	2.36818	2.36818	2.36818	2.36818	2.36818	2.36818	3.10226	2.36818
ENSGALG00010001843	9.2935	9.52992	9.15605	9.24979	9.07343	9.04148	9.01772	9.50832	9.18617	9.16856	9.08824	9.27808	9.65849	9.22625	9.17634
ENSGALG00010001844	7.28746	7.37387	7.5333	7.80637	6.8028	7.041	7.84073	7.696	8.12166	7.73593	7.46879	7.07568	5.0449	7.22359	7.44464
ENSGALG00010001845	9.70565	10.3521	9.85503	8.53132	8.87083	8.85113	8.59287	10.0566	9.61794	9.46353	9.06904	8.63601	9.1167	8.69058	8.85743
ENSGALG00010001847	4.89003	2.36818	4.13432	3.15421	2.36818	3.42463	3.75932	4.53128	3.20418	3.44602	3.28561	2.36818	2.96741	2.36818	2.36818
ENSGALG00010001848	2.36818	2.92771	3.91923	3.79776	3.51578	3.12336	3.08366	2.36818	4.55155	3.13898	3.42189	3.09206	2.36818	2.36818	3.20646
ENSGALG00010001849	9.16195	8.9365	8.99521	9.70835	9.94338	9.65511	9.92861	9.0452	9.5798	9.06869	9.28916	9.6319	9.89319	9.69418	9.62592
ENSGALG00010001850	3.93813	4.43816	4.61815	4.97596	5.46432	4.96251	6.32155	4.64806	3.77956	3.44602	3.12136	5.22836	5.54853	5.36072	6.05299
ENSGALG00010001852	10.3999	10.2185	9.70045	9.438	9.84689	8.96832	9.82109	10.4307	9.30885	10.4279	9.23332	9.8898	10.0514	9.85176	10.641
ENSGALG00010001853	6.66461	6.23342	6.5078	6.69398	6.88931	7.07242	6.91012	6.24805	6.68322	6.5746	6.6126	7.27453	6.9218	6.66634	6.77581
ENSGALG00010001854	5.09875	5.305	5.29233	4.89987	3.75681	4.46906	4.0431	6.50691	6.32931	5.97087	6.7053	3.3817	4.56415	3.79355	4.07099
ENSGALG00010001856	8.58229	8.70869	8.65877	9.03545	8.97321	8.85113	9.50839	9.50463	8.03603	8.4473	8.66311	9.38791	9.05921	10.0357	8.92816
ENSGALG00010001857	11.7467	11.7224	11.8108	12.0589	11.9314	11.7385	12.0523	12.0058	12.0428	11.6226	11.7095	12.1222	12.5579	12.1599	11.9962
ENSGALG00010001858	7.14183	7.31803	7.23074	6.88864	7.27377	7.8099	6.09292	7.75313	6.81498	6.84523	7.28775	7.3112	7.47036	7.73021	7.28781
ENSGALG00010001860	7.65788	8.08792	7.97116	6.73721	6.53393	6.3121	7.21747	7.33766	7.7376	7.6892	7.70124	6.50776	6.59685	7.21033	7.26274
ENSGALG00010001861	10.7967	10.948	10.7375	10.956	10.3816	10.6367	11.0188	10.9987	10.8139	10.7241	10.8577	10.5271	10.7958	10.7734	11.0248
ENSGALG00010001862	2.91444	3.15467	3.0266	2.36818	2.36818	2.36818	2.36818	2.36818	2.36818	2.91642	2.36818	3.09206	3.78851	2.36818	3.388
ENSGALG00010001864	6.53036	6.0215	7.51615	7.3791	6.23618	7.24772	6.17327	7.17056	8.3438	7.96678	6.4905	7.13145	6.46983	6.77854	7.09293
ENSGALG00010001865	7.75118	8.23077	6.81942	6.51918	7.06679	7.00889	7.24241	8.23075	7.42958	7.86768	8.888	6.3518	5.65703	6.18558	6.32026
ENSGALG00010001866	7.12642	7.16022	7.13278	7.41941	7.36708	7.41626	7.4811	7.83183	7.07592	7.15931	7.587	7.10384	7.63692	6.76044	7.76922
ENSGALG00010001868	8.49511	8.52067	8.57016	8.00036	8.16677	7.84667	7.87301	8.73465	8.6874	9.46661	8.93755	8.01361	7.74424	7.91308	7.53115
ENSGALG00010001869	6.31567	5.89283	4.91805	4.32109	4.26834	5.21353	3.58388	5.4326	3.97873	6.24072	5.44425	5.27947	4.50497	5.58534	3.98283
ENSGALG00010001870	10.8475	10.6632	10.8851	9.85506	9.53167	9.26156	9.13211	10.7148	10.6792	11.5095	10.8385	9.80672	8.82631	8.82267	8.95447
ENSGALG00010001871	7.25241	6.61658	7.70967	7.08534	6.95094	6.61964	7.77392	7.65662	6.08471	6.74709	7.5542	7.80672	7.68208	7.08514	6.59987
ENSGALG00010001873	5.30799	5.04927	5.20783	5.96634	6.42214	6.38916	5.71668	5.5241	4.90382	5.61529	5.56026	5.27947	5.91852	6.10153	5.90876
ENSGALG00010001875	2.91444	2.36818	4.54913	3.15421	2.36818	2.36818	2.36818	3.55874	5.14658	4.55642	2.90375	3.09206	2.36818	3.10226	2.96504
ENSGALG00010001877	10.9532	10.7086	10.5194	11.3611	10.9869	11.7095	11.7941	10.5375	10.8938	10.6863	10.9948	11.3316	10.8916	11.5135	11.2791
ENSGALG00010001878	5.44028	7.35318	6.36134	4.54354	5.14539	3.98948	5.03752	6.50691	6.29683	5.97087	4.9221	5.00263	5.08479	4.20483	4.61322
ENSGALG00010001879	7.76615	8.14115	7.45443	7.68489	7.83808	7.7817	7.37235	7.84357	8.15363	8.24682	7.85274	7.90591	7.55604	7.50992	7.70866
ENSGALG00010001880	9.15249	9.11898	9.04088	9.91615	11.1145	11.5369	10.3442	9.25301	9.17063	8.84547	8.96275	11.0239	11.6931	10.5616	10.1725
ENSGALG00010001882	4.59728	4.32209	4.80599	4.86017	3.75681	4.73844	3.08366	5.07535	4.90382	5.25941	4.95692	5.46705	3.39194	4.41755	4.71944
ENSGALG00010001883	8.74228	8.71949	8.37947	9.49879	10.055	9.71348	9.67777	8.52113	7.03722	8.36713	8.3043	10.6201	10.6014	10.4715	9.73314
ENSGALG00010001884	2.91444	2.36818	2.36818	3.58963	2.36818	2.36818	3.08366	2.36818	2.36818	2.36818	2.36818	4.06115	2.36818	4.41755	4.07099
ENSGALG00010001885	2.36818	2.36818	2.36818	2.36818	3.51578	3.83221	3.08366	2.36818	2.36818	2.36818	2.36818	5.74496	4.07714	4.08302	3.53812
ENSGALG00010001886	9.65427	9.47198	9.50138	9.66853	9.46646	9.09209	9.28082	9.65533	9.98704	9.73793	9.98111	9.58779	9.48561	9.51187	9.31883
ENSGALG00010001888	7.72586	7.72457	8.24542	6.55589	6.95094	5.98762	6.29788	8.39923	7.79666	7.50955	7.53192	6.25439	5.54853	6.62691	5.25977
ENSGALG00010001889	6.95383	5.54579	7.13278	6.86935	7.38206	7.81918	6.36775	7.37049	7.81391	7.37162	6.94371	7.57515	6.88912	7.96134	7.15784
ENSGALG00010001890	4.08723	5.44384	4.68375	7.67937	8.32232	9.38537	8.95504	4.18253	4.36601	4.97078	4.99087	8.98115	8.13135	8.13266	8.09675
ENSGALG00010001892	10.0667	9.84197	9.96178	10.1831	11.0219	11.058	10.5823	9.8912	10.0393	9.90961	9.79845	11.2428	11.1899	10.9431	10.5447
ENSGALG00010001895	9.92606	10.2745	9.97595	5.96634	5.46432	6.99256	7.17922	10.2995	10.0147	10.6365	10.6569	7.21125	6.58328	7.32549	6.20172
ENSGALG00010001896	9.48815	9.57524	9.19966	8.69067	8.27499	8.05736	8.50294	9.43461	8.74249	9.11262	8.7085	8.53119	9.1167	8.71892	9.30458
ENSGALG00010001897	7.60331	7.70838	7.09859	6.53152	5.07177	6.87274	6.03672	7.92867	6.78023	7.89539	8.79053	4.39248	5.00381	5.09292	6.28738
ENSGALG00010001898	7.46325	7.68651	7.4812	7.58213	6.9709	7.08787	7.5224	7.32095	7.53743	7.65177	7.47464	7.15855	7.39484	7.31314	7.2795
ENSGALG00010001899	9.64485	9.10874	9.36679	8.97593	8.54481	7.92611	9.12543	10.1493	10.1555	8.66143	9.30566	8.63118	8.61645	8.28576	9.24615
ENSGALG00010001901	4.08723	4.19425	4.03167	4.59366	3.51578	6.08367	4.27158	4.75538	3.38526	4.65021	5.20762	4.48602	5.16127	4.83349	4.15308
ENSGALG00010001902	8.14027	7.80291	8.0626	8.52826	8.60984	8.64228	8.20636	7.87822	7.89182	8.44418	8.03803	8.83784	8.25602	8.25384	8.18829
ENSGALG00010001903	7.01369	6.78072	6.70276	7.21319	7.0292	7.52237	7.33806	7.27833	7.10427	6.84523	6.85663	7.47098	7.34756	7.78487	8.00404
ENSGALG00010001905	2.91444	2.92771	2.36818	3.15421	2.36818	2.36818	2.36818	2.97599	2.36818	2.36818	2.90375	2.36818	2.36818	3.10226	3.20646
ENSGALG00010001906	9.96983	9.3915	9.83961	8.75241	8.65982	8.49956	8.74009	9.32591	9.9433	9.46969	9.32197	8.56192	8.59638	8.57648	8.89866
ENSGALG00010001908	9.94043	10.3346	9.34024	8.50036	8.80572	8.24116	8.93608	9.55544	9.08323	9.52689	9.42828	8.67401	9.80267	8.17419	9.30867
ENSGALG00010001910	9.70176	9.41495	9.39285	8.30993	7.39688	7.74322	7.67669	9.52298	9.38391	9.57906	9.25217	7.60498	7.60377	7.7578	8.10146
ENSGALG00010001911	4.01505	4.25981	4.03167	3.32518	3.75681	3.98948	4.46461	5.19249	4.36601	5.10656	4.36061	3.3817	3.67284	4.68241	3.78323
ENSGALG00010001912	7.52914	7.27468	6.87438	7.70677	6.42214	7.13326	7.51218	7.82	7.76151	6.58601	6.29199	7.19826	6.39408	5.58534	7.32057
ENSGALG00010001914	6.42072	5.91194	5.55334	6.30574	5.98337	5.56655	6.32155	6.93829	6.32931	5.91746	5.93044	6.60961	6.90009	6.1301	5.39091
ENSGALG00010001915	7.55812	8.2383	8.21916	8.01358	7.74849	8.00141	8.00993	8.03485	8.14911	7.72052	8.00202	8.04296	7.80965	8.07535	7.95796
ENSGALG00010001916	2.36818	2.36818	2.36818	3.58963	2.36818	3.42463	2.36818	2.36818	2.36818	2.36818	2.36818	2.36818	2.36818	2.36818	3.388
ENSGALG00010001918	4.68767	6.00382	4.9708	8.51283	9.27128	10.1683	9.73155	5.33471	5.03056	5.31613	5.515	9.97599	9.10254	9.14156	9.12399
ENSGALG00010001919	3.13622	2.36818	2.36818	4.05065	2.36818	3.83221	4.27158	2.97599	2.36818	2.91642	3.12136	2.36818	2.36818	3.39571	5.18926
ENSGALG00010001921	4.9632	4.49248	3.91923	4.38042	4.62881	4.2523	5.3497	5.03398	5.35299	5.04035	4.36061	4.39248	5.08479	5.15078	2.96504
ENSGALG00010001922	2.36818	2.36818	3.0266	2.92738	2.36818	2.36818	3.37016	2.36818	2.36818	2.91642	2.36818	2.36818	2.36818	2.36818	3.66794
ENSGALG00010001923	10.1604	9.44457	9.66004	8.40662	8.12289	8.23424	8.37922	9.88837	10.0563	9.81005	9.66284	8.55175	8.11263	8.23433	8.28684
ENSGALG00010001924	2.36818	2.92771	2.36818	2.36818	2.36818	2.36818	3.75932	2.36818	2.36818	2.36818	2.90375	2.36818	2.36818	3.10226	3.66794
ENSGALG00010001925	6.43332	5.33389	6.1543	3.88844	2.36818	4.2523	4.16268	6.60695	6.2803	5.39711	5.80503	4.57328	3.89304	4.96936	3.98283
ENSGALG00010001926	2.36818	2.92771	2.36818	2.92738	2.36818	2.36818	2.36818	2.36818	2.36818	2.36818	2.36818	2.36818	2.36818	2.36818	3.88744
ENSGALG00010001928	7.85757	7.4077	7.13278	5.77103	5.34535	5.42599	5.60465	6.63429	7.26358	7.58526	7.37799	5.59291	6.1393	6.47966	6.01325
ENSGALG00010001929	8.48005	8.1886	8.4579	8.57656	8.52472	8.51676	8.29835	8.47662	8.59063	8.42846	8.34639	8.76927	8.54145	8.53988	8.65093
ENSGALG00010001930	3.30352	2.36818	2.36818	2.36818	2.36818	3.12336	2.36818	2.36818	2.36818	2.36818	2.90375	3.09206	3.20974	3.10226	3.98283
ENSGALG00010001931	2.91444	2.36818	3.0266	2.92738	2.36818	2.36818	3.08366	2.36818	3.20418	3.44602	2.36818	3.09206	2.36818	2.36818	2.36818
ENSGALG00010001932	3.44225	2.36818	2.36818	3.32518	2.36818	3.12336	2.36818	3.4062	2.36818	3.13898	3.54014	2.36818	2.96741	2.36818	2.36818
ENSGALG00010001933	2.36818	3.32572	3.29159	3.15421	3.75681	4.2523	3.58388	2.97599	3.38526	3.67413	3.64546	3.09206	3.98872	3.39571	3.53812
ENSGALG00010001934	2.36818	2.92771	2.36818	3.15421	3.51578	4.2523	3.08366	2.97599	2.36818	2.36818	3.42189	2.36818	2.36818	2.36818	3.66794
ENSGALG00010001935	8.39912	8.47037	8.20853	8.31705	8.70218	8.64228	8.4289	8.18997	8.0555	7.90905	8.08469	8.53119	8.68141	8.27944	8.45477
ENSGALG00010001936	3.76668	3.59031	3.29159	2.92738	3.51578	4.2523	3.08366	2.36818	2.9634	3.77145	3.54014	2.36818	2.36818	2.36818	3.388
ENSGALG00010001937	2.36818	2.36818	2.36818	2.36818	2.36818	3.12336	2.36818	2.36818	2.36818	3.77145	2.36818	3.09206	2.36818	3.10226	2.36818
ENSGALG00010001938	7.75118	7.66429	7.9329	7.7962	7.27377	7.39158	7.75672	7.64995	8.0555	7.77126	8.28445	7.51356	7.52096	7.88834	7.7271
ENSGALG00010001940	9.03378	8.7141	8.86583	7.98255	8.12289	7.74322	7.77392	9.30059	8.60061	8.72456	9.02187	7.92968	7.68842	7.93741	8.01908
ENSGALG00010001941	2.91444	3.79854	3.0266	3.79776	3.19006	2.36818	4.27158	3.4062	3.66453	3.30684	3.12136	3.59763	2.36818	3.10226	2.36818
ENSGALG00010001945	2.36818	2.36818	3.0266	2.36818	2.36818	2.36818	2.36818	2.36818	2.36818	2.36818	2.36818	2.36818	2.36818	2.36818	2.36818
ENSGALG00010001947	4.73065	4.43816	3.49004	2.36818	4.40004	3.98948	3.08366	3.80759	4.36601	4.09288	3.90973	3.09206	2.96741	2.36818	4.37086
ENSGALG00010001948	9.07043	8.80316	8.9983	6.75835	6.61239	7.20586	7.30293	9.5248	9.08323	9.19108	9.27916	7.2621	7.08457	7.4091	7.13959
ENSGALG00010001949	2.36818	2.36818	2.36818	2.36818	2.36818	2.36818	2.36818	2.36818	2.36818	2.36818	3.42189	2.36818	2.36818	2.36818	2.36818
ENSGALG00010001952	8.62672	8.90844	8.57431	8.69341	8.56463	8.79582	8.45045	8.71243	8.51881	8.65604	8.58954	8.38989	8.66865	8.52391	8.84904
ENSGALG00010001957	8.60745	8.39146	8.81064	9.12748	9.10985	9.37597	8.95881	8.66031	8.89885	8.67214	8.85025	9.29951	8.37862	9.21966	8.97518
ENSGALG00010001958	10.0728	9.87859	9.67364	7.5401	7.28975	7.10316	7.70386	10.0914	9.33098	9.57478	9.57163	7.41593	7.65645	7.5207	8.00404
ENSGALG00010001961	2.91444	3.97323	3.91923	3.32518	4.12108	4.36529	3.08366	4.01002	3.20418	2.36818	2.36818	3.59763	3.78851	3.61431	3.388
ENSGALG00010001966	9.10813	8.3538	8.85223	6.56792	6.66241	6.92532	5.56524	9.00136	9.03011	8.3965	8.34319	6.1225	6.42486	6.86577	6.38383
ENSGALG00010001967	3.76668	4.54462	3.0266	5.24406	6.2027	4.81733	6.12021	3.80759	3.77956	3.67413	4.64945	4.65509	4.30919	5.58534	5.18926
ENSGALG00010001969	6.7273	6.85134	6.34194	6.02005	6.86817	6.68213	6.83005	6.0176	5.76561	6.35198	6.58032	7.58516	7.51384	6.34016	6.57288
ENSGALG00010001971	8.02879	7.89639	7.4454	4.68853	5.40609	3.83221	4.16268	7.14231	7.66971	6.90106	7.26089	3.59763	3.78851	3.39571	3.53812
ENSGALG00010001972	9.30891	9.46558	9.12811	8.47191	8.64128	8.70367	8.4611	9.21287	9.12299	9.05238	9.31873	8.48383	8.85193	8.74212	9.02816
ENSGALG00010001974	2.36818	3.69959	4.54913	2.92738	3.51578	3.98948	3.58388	3.4062	2.36818	2.91642	2.36818	2.36818	2.96741	3.79355	2.36818
ENSGALG00010001976	10.6362	9.51293	10.5876	3.32518	3.19006	2.36818	3.91005	10.004	11.1974	9.70701	9.96666	3.59763	3.20974	4.59993	4.22999
ENSGALG00010001977	3.44225	3.15467	3.65355	4.86017	3.75681	4.2523	4.27158	4.01002	4.2254	3.67413	2.36818	4.48602	4.15947	4.08302	4.99544
ENSGALG00010001978	2.36818	2.36818	2.36818	2.36818	2.36818	2.36818	2.36818	2.36818	2.36818	2.36818	2.36818	2.36818	2.36818	2.36818	3.53812
ENSGALG00010001979	2.36818	3.15467	2.36818	4.05065	3.19006	2.36818	3.37016	2.36818	2.36818	2.36818	2.36818	2.36818	3.67284	3.61431	3.388
ENSGALG00010001980	2.36818	2.36818	3.0266	2.36818	2.36818	2.36818	2.36818	2.36818	2.36818	2.36818	2.36818	2.36818	2.36818	3.10226	2.36818
ENSGALG00010001981	2.36818	2.36818	2.36818	2.36818	2.36818	2.36818	2.36818	2.36818	3.53501	2.36818	2.36818	2.36818	3.54258	2.36818	2.36818
ENSGALG00010001982	12.3597	11.2616	11.8903	10.2413	10.3343	9.75273	10.2475	12.1575	12.2552	11.6414	11.3632	10.2692	10.7244	10.2499	10.4219
ENSGALG00010001983	2.36818	2.36818	3.29159	2.92738	2.36818	2.36818	2.36818	2.36818	2.36818	3.44602	2.36818	2.36818	3.20974	2.36818	2.36818
ENSGALG00010001987	4.01505	3.69959	4.13432	3.88844	3.95331	4.2523	3.75932	3.4062	3.38526	4.34578	2.36818	4.18175	4.87257	4.90312	3.388
ENSGALG00010001988	2.36818	2.36818	2.36818	3.46686	2.36818	2.36818	2.36818	2.36818	2.36818	2.36818	2.36818	3.09206	2.36818	2.36818	3.98283
ENSGALG00010001989	2.36818	2.36818	2.36818	2.36818	2.36818	2.36818	3.08366	2.36818	2.36818	2.36818	2.36818	2.36818	2.36818	2.36818	2.96504
ENSGALG00010001991	10.1707	10.0754	10.314	10.3303	10.5828	10.2006	10.2054	10.2083	10.0779	10.4715	9.9739	10.5193	9.38195	10.1887	9.89401
ENSGALG00010001993	2.36818	2.36818	2.36818	2.36818	3.95331	2.36818	2.36818	2.36818	2.36818	2.36818	2.36818	2.36818	2.36818	2.36818	2.36818
ENSGALG00010001994	3.56255	2.92771	3.65355	2.92738	2.36818	2.36818	3.75932	2.36818	3.66453	3.13898	2.36818	2.36818	2.36818	2.36818	2.36818
ENSGALG00010001995	9.0461	9.15724	8.7162	9.40829	9.19282	8.88686	9.40462	9.06788	8.75445	8.94823	8.7645	9.09759	9.50727	8.92352	9.28399
ENSGALG00010001996	2.36818	2.36818	2.36818	2.36818	2.36818	2.36818	2.36818	2.36818	2.36818	2.36818	3.12136	2.36818	2.36818	2.36818	2.36818
ENSGALG00010001997	9.27093	9.24773	9.28311	9.28292	9.18003	9.12986	9.19089	9.35488	9.15267	9.03588	9.27916	9.38791	9.4469	9.46244	9.48505
ENSGALG00010001999	4.39535	4.86135	4.86318	3.46686	3.51578	2.36818	2.36818	4.26041	4.81225	4.55642	3.90973	2.36818	2.36818	2.36818	3.20646
ENSGALG00010002001	3.76668	3.79854	4.39904	2.36818	3.51578	3.12336	2.36818	3.55874	3.66453	4.50689	3.12136	2.36818	2.36818	2.36818	2.36818
ENSGALG00010002002	3.30352	3.59031	3.79447	2.92738	2.36818	2.36818	2.36818	2.36818	3.66453	2.91642	2.36818	3.09206	2.36818	2.36818	3.53812
ENSGALG00010002003	3.56255	2.92771	3.29159	3.32518	2.36818	3.83221	2.36818	3.22162	2.36818	2.36818	3.28561	2.36818	2.36818	2.36818	2.96504
ENSGALG00010002005	2.91444	4.77825	5.77344	5.14952	3.51578	4.96251	5.03752	5.26541	5.81253	6.02236	3.9855	4.73215	3.67284	3.61431	5.11497
ENSGALG00010002006	3.56255	3.46747	3.49004	3.69886	3.19006	2.36818	2.36818	3.4062	3.20418	2.91642	3.54014	3.09206	3.39194	2.36818	2.36818
ENSGALG00010002008	3.30352	2.36818	2.36818	2.36818	2.36818	2.36818	2.36818	2.36818	3.20418	2.36818	2.36818	2.36818	2.36818	2.36818	2.36818
ENSGALG00010002012	7.3942	7.63032	6.45462	6.33423	6.30089	6.59819	6.0651	7.05406	7.50237	7.52146	7.01781	6.82808	6.94318	6.8826	6.3682
ENSGALG00010002013	2.36818	2.36818	2.36818	2.36818	2.36818	3.83221	2.36818	2.36818	2.36818	2.36818	2.36818	2.36818	2.36818	2.36818	2.36818
ENSGALG00010002017	7.407	8.31869	7.31255	8.40327	8.13178	8.90003	8.1283	7.78999	7.80819	7.16691	8.26094	7.57515	7.37139	8.35963	7.49573
ENSGALG00010002019	3.66965	3.79854	3.0266	2.36818	2.36818	2.36818	3.37016	3.22162	2.36818	2.36818	2.36818	3.09206	3.54258	2.36818	2.36818
ENSGALG00010002022	2.36818	3.15467	3.79447	2.92738	2.36818	4.46906	3.37016	2.97599	3.53501	2.91642	2.36818	3.09206	3.89304	3.79355	4.37086
ENSGALG00010002023	5.48988	5.08394	4.61815	5.98447	4.82372	5.02969	5.75213	5.63753	4.60795	5.56965	5.39502	4.18175	5.08479	5.88368	6.79927
ENSGALG00010002024	3.44225	2.92771	3.29159	4.32109	4.26834	3.64872	4.0431	2.36818	2.9634	3.30684	2.36818	3.09206	4.07714	3.39571	3.88744
ENSGALG00010002025	2.36818	2.36818	3.29159	2.36818	2.36818	3.12336	2.36818	2.36818	3.20418	2.36818	2.90375	2.36818	2.36818	3.10226	2.36818
ENSGALG00010002029	2.91444	2.36818	2.36818	3.69886	3.19006	2.36818	3.37016	2.97599	3.97873	3.30684	2.90375	2.36818	3.20974	3.10226	2.96504
ENSGALG00010002031	3.44225	4.125	3.0266	3.32518	3.19006	2.36818	2.36818	3.55874	3.20418	4.02051	3.82855	2.36818	3.67284	3.94737	3.20646
ENSGALG00010002033	3.30352	4.43816	2.36818	3.69886	3.95331	3.12336	4.78143	3.22162	4.14864	2.36818	2.90375	3.77479	6.2118	3.39571	3.98283
ENSGALG00010002034	10.126	9.8308	9.93783	9.32593	9.38337	9.53922	9.14208	9.99872	9.57138	9.90167	9.73651	9.37066	10.0962	9.49831	9.60283
ENSGALG00010002035	3.44225	4.68966	4.39904	3.58963	3.95331	4.46906	3.37016	4.18253	3.66453	2.36818	2.36818	3.59763	3.20974	4.08302	3.88744
ENSGALG00010002036	7.407	7.58374	7.57532	7.37227	7.98261	6.87274	7.83255	7.98804	7.79086	7.30427	7.85722	7.74554	7.6629	7.64412	7.80438
ENSGALG00010002039	8.44015	8.36761	8.53654	8.36253	8.45565	8.36668	8.45045	8.4423	8.49405	8.76266	8.50631	8.42374	8.73747	8.46378	8.46578
ENSGALG00010002041	9.41562	10.59	10.2112	9.60737	10.3909	10.2682	10.0535	9.9178	10.0575	9.83052	9.46548	10.0283	10.5955	10.5537	9.6422
ENSGALG00010002042	2.91444	3.32572	2.36818	4.25883	2.36818	7.20586	2.36818	2.97599	2.36818	2.36818	2.36818	3.77479	2.96741	3.79355	3.66794
ENSGALG00010002045	2.91444	3.15467	2.36818	2.36818	2.36818	2.36818	2.36818	2.36818	2.36818	2.36818	2.36818	2.36818	3.67284	2.36818	2.96504
ENSGALG00010002046	10.321	10.7295	10.4977	9.07171	8.60346	8.58904	8.93608	10.5819	10.5743	10.585	10.52	8.41816	8.43245	8.46935	8.99306
ENSGALG00010002052	2.91444	2.36818	3.29159	2.36818	2.36818	3.12336	3.37016	2.97599	2.36818	2.91642	2.36818	2.36818	2.96741	3.39571	2.36818
ENSGALG00010002054	9.23192	9.23837	8.78224	8.73124	8.30672	8.27526	8.74009	8.91504	8.89616	8.77265	8.90975	8.27091	9.29331	8.82267	8.91483
ENSGALG00010002055	2.91444	3.32572	3.29159	3.69886	4.26834	5.26976	5.09469	3.69057	3.38526	3.44602	3.54014	3.59763	4.91773	3.79355	5.29373
ENSGALG00010002056	2.36818	3.15467	3.65355	7.2284	4.62881	5.02969	6.57873	3.22162	3.20418	3.30684	2.36818	4.805	3.98872	3.61431	7.28781
ENSGALG00010002059	3.30352	3.69959	2.36818	2.92738	2.36818	3.98948	3.08366	3.22162	2.9634	3.13898	2.90375	2.36818	2.36818	3.39571	3.388
ENSGALG00010002060	2.36818	2.36818	2.36818	2.92738	2.36818	2.36818	2.36818	2.36818	2.36818	2.36818	2.36818	2.36818	2.36818	2.36818	2.36818
ENSGALG00010002062	6.1725	7.46666	6.71787	9.4016	8.61618	8.85564	9.63608	8.26606	9.1684	8.42846	8.41797	8.37842	9.36426	9.00248	9.72399
ENSGALG00010002063	2.36818	2.36818	2.36818	3.32518	2.36818	2.36818	2.36818	2.36818	2.36818	2.36818	2.36818	2.36818	2.36818	2.36818	2.36818
ENSGALG00010002064	3.76668	2.92771	4.31686	5.04803	3.95331	3.83221	4.97787	2.36818	4.14864	2.91642	2.36818	3.59763	3.20974	3.10226	4.3024
ENSGALG00010002065	9.65427	9.42324	9.53794	9.91849	9.95343	9.73078	9.91318	9.53207	9.5389	9.54303	9.6409	9.90586	10.0053	9.988	9.92361
ENSGALG00010002067	3.8557	4.19425	5.29233	5.70678	4.12108	4.56511	5.14958	2.36818	4.06671	3.94339	3.54014	2.36818	3.67284	3.79355	3.78323
ENSGALG00010002068	2.36818	2.92771	3.49004	2.36818	2.36818	2.36818	2.36818	2.36818	2.36818	2.36818	2.36818	2.36818	2.36818	2.36818	2.36818
ENSGALG00010002069	2.36818	2.36818	3.29159	2.92738	2.36818	2.36818	2.36818	2.36818	2.36818	3.13898	2.36818	2.36818	2.36818	2.36818	2.36818
ENSGALG00010002071	4.50023	4.38145	4.74626	4.12408	3.51578	3.42463	4.0431	3.9133	4.98961	4.73779	4.9221	4.18175	3.78851	4.08302	3.98283
ENSGALG00010002072	7.48152	7.51712	7.37099	7.94163	7.75999	8.14851	8.00266	7.59546	7.87548	8.30651	7.06517	7.93751	7.5903	8.10429	7.81015
ENSGALG00010002074	2.36818	2.36818	3.0266	2.92738	2.36818	3.12336	3.37016	2.36818	2.36818	2.36818	2.36818	2.36818	2.36818	2.36818	2.36818
ENSGALG00010002077	3.44225	3.32572	2.36818	3.32518	3.19006	3.98948	2.36818	4.53128	2.36818	2.36818	2.90375	2.36818	2.36818	3.79355	2.36818
ENSGALG00010002084	9.71725	10.3914	10.8123	9.40996	8.39053	8.0807	8.79585	10.6841	10.6776	10.8592	9.58657	8.64081	8.19058	7.91308	8.74738
ENSGALG00010002087	8.39591	8.52375	8.44889	8.65175	8.14061	7.90011	8.78741	8.6866	8.48331	8.13506	8.60829	8.73821	9.47832	8.91538	9.0082
ENSGALG00010002088	5.58413	7.05309	7.07534	5.2742	5.62577	5.91978	3.37016	5.55333	5.92346	5.8992	6.85663	6.1225	5.6829	5.77903	6.38383
ENSGALG00010002090	8.30314	7.97066	8.18702	8.19859	8.0959	8.4103	8.4874	7.81405	8.23273	7.86768	8.14831	8.18795	8.63952	8.50233	8.34766
ENSGALG00010002091	2.36818	2.36818	3.0266	2.36818	2.36818	2.36818	2.36818	2.36818	2.9634	2.36818	2.36818	2.36818	2.36818	2.36818	3.20646
ENSGALG00010002092	3.13622	3.32572	3.49004	3.69886	3.51578	3.64872	3.75932	3.22162	4.06671	2.36818	2.90375	3.09206	3.39194	2.36818	3.53812
ENSGALG00010002093	2.36818	2.36818	2.36818	2.92738	2.36818	2.36818	2.36818	2.36818	3.20418	2.36818	2.36818	2.36818	2.36818	2.36818	2.36818
ENSGALG00010002094	2.36818	2.36818	3.0266	2.92738	2.36818	2.36818	2.36818	2.36818	2.36818	2.36818	2.36818	2.36818	2.36818	2.36818	2.36818
ENSGALG00010002095	2.91444	2.36818	2.36818	2.36818	2.36818	2.36818	2.36818	2.97599	2.9634	2.91642	2.90375	2.36818	2.36818	2.36818	2.36818
ENSGALG00010002096	2.36818	2.36818	2.36818	3.15421	2.36818	3.42463	2.36818	2.36818	2.36818	2.36818	2.36818	2.36818	2.36818	2.36818	2.96504
ENSGALG00010002097	3.44225	3.79854	3.29159	4.97596	3.51578	3.12336	4.0431	3.22162	2.9634	3.5667	3.28561	4.29153	3.67284	3.61431	4.22999
ENSGALG00010002098	5.62899	5.85382	5.65189	5.0827	6.2027	5.9541	5.68031	5.8867	5.03056	5.34365	5.62554	5.94622	5.75779	5.81478	5.07627
ENSGALG00010002100	8.06153	7.80291	7.07534	7.82648	7.13914	7.72358	7.73932	6.73874	7.25518	7.76126	7.7931	7.3112	7.92146	7.82019	8.0487
ENSGALG00010002101	3.13622	2.36818	2.36818	2.36818	2.36818	2.36818	2.36818	2.36818	2.36818	3.44602	3.12136	2.36818	2.36818	3.10226	2.36818
ENSGALG00010002102	7.0951	7.48579	7.39934	8.57358	8.0684	7.48786	8.64051	8.01423	7.62478	7.45471	7.76472	8.22683	8.66544	8.20791	8.48757
ENSGALG00010002105	4.39535	3.97323	4.54913	4.81927	4.51944	4.56511	4.16268	4.403	4.55155	4.28722	4.36061	3.92692	3.67284	4.20483	4.43584
ENSGALG00010002106	3.13622	2.36818	3.0266	2.92738	2.36818	2.36818	2.36818	2.36818	2.9634	2.91642	2.36818	2.36818	2.36818	3.39571	2.96504
ENSGALG00010002107	5.22215	5.04927	5.68327	6.00237	6.73432	6.28547	5.68031	4.99133	4.81225	5.13851	5.41985	6.75888	6.36262	6.94802	6.07245
ENSGALG00010002111	2.91444	2.36818	3.0266	2.36818	2.36818	2.36818	2.36818	2.36818	2.36818	2.36818	2.36818	2.36818	2.36818	2.36818	2.36818
ENSGALG00010002113	5.19231	5.85382	6.45462	4.25883	5.28184	4.36529	4.27158	6.24805	5.58795	6.46761	6.54729	5.3764	4.72724	5.20631	4.07099
ENSGALG00010002114	3.76668	3.32572	4.03167	2.36818	2.36818	3.42463	3.91005	4.33372	4.14864	4.28722	3.74093	3.09206	3.39194	2.36818	3.78323
ENSGALG00010002115	4.8127	3.46747	4.03167	3.69886	4.12108	2.36818	3.58388	3.80759	4.06671	5.07385	3.64546	3.77479	4.30919	3.94737	4.3024
ENSGALG00010002116	4.39535	4.43816	4.9708	4.05065	4.62881	3.98948	4.91549	4.53128	5.03056	4.85929	4.30548	4.29153	4.77745	4.31567	5.03645
ENSGALG00010002117	4.59728	4.43816	3.91923	2.36818	2.36818	2.36818	2.36818	2.97599	3.97873	4.55642	3.82855	2.36818	2.96741	3.10226	2.36818
ENSGALG00010002118	5.77566	5.61768	6.08584	5.85241	5.9433	6.64077	6.39031	5.36811	4.81225	5.97087	5.23599	6.27937	4.15947	6.07238	5.51081
ENSGALG00010002120	2.36818	3.79854	2.36818	2.36818	2.36818	2.36818	2.36818	2.36818	2.36818	2.36818	2.36818	2.36818	2.36818	2.36818	2.36818
ENSGALG00010002122	4.64325	5.0137	4.31686	3.58963	2.36818	3.12336	3.08366	3.80759	2.36818	3.30684	3.12136	2.36818	2.36818	2.36818	2.36818
ENSGALG00010002124	3.76668	4.43816	3.49004	2.36818	2.36818	2.36818	2.36818	3.69057	3.88354	3.13898	3.54014	2.36818	2.36818	3.10226	2.36818
ENSGALG00010002125	2.91444	2.36818	2.36818	2.36818	3.19006	2.36818	2.36818	2.36818	2.9634	2.36818	2.90375	2.36818	2.36818	2.36818	2.36818
ENSGALG00010002126	7.99528	8.60468	8.86244	5.61631	3.75681	4.73844	5.5247	8.01423	9.2698	8.91704	8.92265	5.00263	3.98872	3.61431	4.55673
ENSGALG00010002127	2.36818	3.15467	3.0266	2.36818	2.36818	2.36818	2.36818	3.4062	2.36818	2.36818	3.42189	2.36818	2.36818	3.79355	2.96504
ENSGALG00010002129	3.56255	2.36818	2.36818	2.36818	2.36818	2.36818	2.36818	2.36818	2.36818	2.36818	2.36818	2.36818	2.96741	2.36818	2.96504
ENSGALG00010002131	2.36818	2.36818	3.29159	2.92738	2.36818	2.36818	2.36818	2.36818	2.36818	2.36818	2.36818	2.36818	2.36818	2.36818	2.36818
ENSGALG00010002132	2.36818	2.36818	2.36818	2.36818	2.36818	2.36818	3.08366	2.36818	2.36818	2.91642	3.28561	2.36818	2.36818	2.36818	2.36818
ENSGALG00010002133	2.36818	2.36818	2.36818	2.92738	3.95331	2.36818	4.46461	2.36818	2.36818	2.36818	2.36818	3.09206	3.54258	3.39571	3.66794
ENSGALG00010002134	9.43917	9.29184	9.67364	9.57505	9.70533	9.74302	9.77702	9.58893	9.30885	9.3794	9.37141	9.58779	9.37804	9.58809	9.79704
ENSGALG00010002135	9.98056	9.57077	10.1162	8.79386	9.98808	9.12238	8.77466	10.135	9.63098	9.52983	9.94891	10.2426	9.6308	10.0801	8.52667
ENSGALG00010002136	6.57652	6.93732	7.54181	5.38862	3.51578	5.52124	4.91549	7.00259	7.47369	7.50356	7.08828	5.27947	4.30919	5.31113	5.97237
ENSGALG00010002137	11.0072	10.8677	10.914	10.6124	10.1844	10.4207	10.8222	10.8467	10.6224	10.8223	10.6316	10.1137	10.2929	10.3842	11.0354
ENSGALG00010002138	5.73528	5.0137	4.61815	6.50673	8.29094	8.52812	6.12021	5.36811	5.28753	5.95329	5.39502	8.89929	7.29866	8.45257	5.67343
ENSGALG00010002140	4.15531	3.69959	4.13432	3.32518	3.51578	3.12336	3.08366	4.01002	2.9634	2.91642	3.42189	2.36818	3.20974	2.36818	3.20646
ENSGALG00010002142	3.93813	4.19425	4.13432	4.25883	3.75681	3.64872	3.08366	3.4062	4.06671	3.5667	3.54014	3.09206	3.67284	3.79355	3.66794
ENSGALG00010002143	2.91444	2.92771	3.0266	2.36818	2.36818	3.12336	2.36818	2.36818	3.53501	3.13898	3.12136	2.36818	2.36818	3.10226	2.96504
ENSGALG00010002145	6.2023	5.70817	5.372	3.97238	4.99399	5.09373	3.91005	5.07535	2.36818	3.77145	4.30548	2.36818	3.20974	3.39571	3.20646
ENSGALG00010002146	9.46386	9.58413	9.59213	10.4182	9.87361	9.72092	9.95145	9.40325	9.30275	9.46507	9.8296	9.66294	9.94569	9.53064	10.4747
ENSGALG00010002147	3.30352	4.05154	2.36818	3.46686	4.99399	2.36818	2.36818	2.36818	3.38526	5.47367	5.02401	4.39248	3.67284	2.36818	2.36818
ENSGALG00010002148	9.02965	9.63067	9.45715	9.35044	9.51479	9.28853	9.22878	9.27916	9.34093	9.09082	8.7501	9.56015	9.55311	9.36421	9.28191
ENSGALG00010002149	5.60674	4.90107	5.80226	5.0827	4.62881	6.23066	4.70903	5.4326	6.65791	5.04035	5.49181	5.46705	4.77745	4.90312	6.01325
ENSGALG00010002150	12.2312	12.0978	12.0339	12.7506	13.1871	12.8248	12.7745	11.9947	11.8399	12.2648	12.1008	13.0435	13.4754	12.9256	12.992
ENSGALG00010002153	2.36818	2.36818	3.65355	2.36818	3.19006	3.12336	2.36818	2.36818	2.36818	2.91642	3.12136	2.36818	2.36818	2.36818	2.36818
ENSGALG00010002154	4.28108	5.33389	4.54913	3.46686	3.19006	3.64872	3.08366	4.26041	5.35299	4.45539	4.12376	4.39248	3.54258	3.94737	4.3024
ENSGALG00010002155	2.36818	2.36818	3.0266	2.36818	2.36818	3.12336	3.08366	2.36818	2.36818	2.36818	2.36818	2.36818	2.96741	2.36818	2.36818
ENSGALG00010002156	3.56255	3.79854	3.79447	4.12408	3.95331	4.6546	3.58388	4.53128	4.66204	3.77145	3.64546	3.59763	3.67284	3.10226	3.66794
ENSGALG00010002157	3.56255	2.36818	3.0266	2.92738	2.36818	3.42463	3.37016	2.97599	2.36818	2.36818	3.74093	2.36818	2.96741	2.36818	3.88744
ENSGALG00010002158	3.30352	3.59031	4.03167	3.79776	3.75681	3.98948	3.08366	4.01002	4.14864	3.77145	3.90973	3.92692	3.39194	3.94737	2.96504
ENSGALG00010002159	10.8948	10.0142	9.97752	7.21319	7.30555	7.32797	7.95068	9.43267	8.95176	10.5829	9.39936	7.27453	6.73822	7.80264	8.12945
ENSGALG00010002160	9.41087	8.875	9.23938	8.85388	7.9924	8.57268	9.38237	8.75031	8.52581	9.36296	8.65283	8.60683	8.48434	8.48043	8.26598
ENSGALG00010002161	8.28938	7.44727	7.88693	8.107	7.93264	7.96006	8.30428	8.05518	7.42958	7.53914	7.84823	7.57515	8.45492	7.68302	8.95708
ENSGALG00010002163	4.8127	4.125	4.68375	4.1933	4.26834	5.21353	4.27158	3.9133	4.90382	4.40176	4.84966	4.48602	4.30919	4.20483	4.71944
ENSGALG00010002165	2.91444	2.36818	2.36818	3.15421	2.36818	2.36818	3.91005	2.36818	2.36818	2.36818	2.36818	3.09206	2.36818	2.36818	2.96504
ENSGALG00010002166	2.36818	2.36818	2.36818	2.36818	2.36818	2.36818	2.36818	3.22162	2.36818	2.36818	2.36818	2.36818	2.36818	3.10226	2.36818
ENSGALG00010002168	2.36818	3.15467	2.36818	2.36818	2.36818	2.36818	2.36818	2.36818	2.36818	2.36818	2.36818	2.36818	2.36818	2.36818	3.388
ENSGALG00010002169	2.36818	2.36818	2.36818	2.36818	2.36818	2.36818	3.08366	2.36818	2.9634	2.91642	2.90375	3.09206	3.54258	3.10226	2.36818
ENSGALG00010002171	2.36818	2.36818	2.36818	2.36818	2.36818	3.83221	3.37016	2.36818	2.36818	2.36818	2.90375	3.09206	2.36818	2.36818	2.36818
ENSGALG00010002173	2.91444	4.05154	3.29159	3.46686	4.26834	3.42463	3.08366	3.22162	3.20418	2.36818	3.12136	3.09206	3.67284	3.10226	3.20646
ENSGALG00010002174	5.79542	5.08394	5.07056	4.05065	4.91152	4.73844	3.75932	4.75538	2.9634	3.77145	4.64945	2.36818	3.98872	3.39571	3.388
ENSGALG00010002175	2.91444	2.36818	2.36818	3.46686	2.36818	2.36818	2.36818	2.36818	2.36818	2.36818	2.36818	2.36818	2.36818	3.10226	3.88744
ENSGALG00010002177	9.7923	9.8082	9.52729	9.94517	9.8114	9.73324	10.0179	9.47288	9.51975	9.76821	9.72183	9.60264	9.94701	9.9225	10.0014
ENSGALG00010002179	3.8557	2.36818	2.36818	3.15421	2.36818	2.36818	2.36818	2.97599	2.36818	2.36818	2.36818	3.09206	2.96741	2.36818	2.36818
ENSGALG00010002181	7.30124	7.01845	6.1543	6.61505	7.13914	7.26141	5.88569	7.31253	6.29683	7.03181	7.00976	7.18514	6.44001	7.27544	6.84508
ENSGALG00010002184	2.36818	3.69959	2.36818	3.79776	4.99399	5.73449	5.88569	2.36818	2.36818	2.36818	2.36818	6.17673	5.36827	5.03253	5.32688
ENSGALG00010002185	7.90344	7.90114	7.0517	2.92738	8.53145	7.48786	7.3836	7.95596	7.93452	7.76126	6.78296	8.12759	7.52096	8.12562	7.45943
ENSGALG00010002186	9.16948	9.18869	8.81766	8.34172	7.42608	7.71367	8.26226	9.1739	8.86615	8.95263	8.92479	7.81525	8.26876	8.11143	8.49834
ENSGALG00010002187	6.31567	5.64086	5.20783	6.57985	8.04037	7.74322	6.55898	6.05869	5.32065	6.22618	6.58032	8.26469	6.94318	6.54462	6.83376
ENSGALG00010002188	2.91444	2.92771	2.36818	2.36818	2.36818	2.36818	2.36818	3.22162	2.9634	2.91642	3.12136	3.09206	2.96741	2.36818	2.36818
ENSGALG00010002191	2.36818	2.36818	3.0266	2.36818	2.36818	2.36818	3.08366	2.36818	2.9634	2.91642	3.54014	3.09206	2.36818	2.36818	2.96504
ENSGALG00010002192	9.35255	8.92487	8.30154	8.52826	6.63762	6.95933	8.33357	8.30477	9.12529	8.98951	8.43608	7.9218	7.71349	8.42416	7.94752
ENSGALG00010002193	2.91444	3.15467	2.36818	2.92738	3.95331	2.36818	2.36818	3.22162	3.53501	2.36818	2.36818	2.36818	2.36818	3.10226	2.96504
ENSGALG00010002194	9.9944	10.3633	10.2218	9.30638	9.21389	9.12613	9.55388	9.87271	9.82777	9.74303	9.5399	9.00371	9.51441	9.2684	9.32085
ENSGALG00010002196	8.77225	8.89658	8.46238	10.3347	10.1167	10.0294	10.1373	8.99349	8.70291	8.52325	8.65798	10.1927	10.3012	9.82377	10.5229
ENSGALG00010002197	8.21129	8.68131	7.75424	10.5616	9.82242	10.0393	10.6256	9.2552	8.08423	8.04309	8.75731	10.0098	9.95754	10.1372	10.1567
ENSGALG00010002200	3.8557	3.88926	3.65355	3.15421	2.36818	3.83221	3.08366	3.9133	3.53501	3.13898	4.12376	2.36818	3.78851	3.10226	3.20646
ENSGALG00010002202	8.33026	7.89162	7.87353	8.26273	8.10496	7.90883	7.84073	8.10478	8.50117	7.95366	8.14465	8.2955	8.18162	7.82889	8.21465
ENSGALG00010002204	3.56255	2.92771	3.0266	3.46686	2.36818	3.64872	3.75932	2.36818	3.20418	2.36818	2.36818	3.09206	2.36818	4.59993	4.22999
ENSGALG00010002205	2.36818	2.36818	2.36818	2.92738	2.36818	2.36818	2.36818	2.97599	2.36818	2.91642	2.36818	2.36818	2.36818	2.36818	2.36818
ENSGALG00010002206	9.13913	9.22895	8.80359	8.73124	9.0455	9.12986	8.89739	8.60624	8.57722	9.26373	8.56232	9.12529	8.34292	8.87397	8.86299
ENSGALG00010002207	2.36818	2.36818	2.36818	3.46686	2.36818	4.36529	2.36818	4.01002	2.36818	2.36818	2.36818	2.36818	2.96741	3.10226	2.36818
ENSGALG00010002208	3.56255	3.97323	4.31686	3.15421	2.36818	2.36818	2.36818	3.69057	3.88354	4.22579	4.46419	2.36818	3.67284	3.10226	3.66794
ENSGALG00010002210	4.08723	2.92771	3.65355	9.7312	7.52386	8.45264	8.9663	4.80598	3.66453	4.16114	3.42189	7.48175	6.71353	8.12562	8.96486
ENSGALG00010002211	9.45311	9.62062	9.37156	10.6073	10.9371	10.844	10.7951	9.56433	8.56709	9.15143	9.64868	10.7481	11.1668	10.499	10.4801
ENSGALG00010002212	2.36818	3.15467	2.36818	2.36818	2.36818	2.36818	2.36818	2.36818	2.36818	2.36818	2.36818	2.36818	2.36818	2.36818	2.96504
ENSGALG00010002213	2.36818	2.36818	3.29159	2.36818	2.36818	2.36818	2.36818	2.36818	2.36818	2.91642	3.54014	2.36818	2.96741	2.36818	2.36818
ENSGALG00010002215	5.48988	5.04927	4.39904	4.1933	3.51578	4.12801	4.37175	4.09937	4.71401	3.13898	4.24782	3.3817	4.77745	4.08302	4.55673
ENSGALG00010002225	9.47606	9.13924	9.61445	9.39657	9.14974	8.94733	9.62665	9.58719	9.81069	9.43236	9.6173	9.30557	9.28288	9.2652	9.38802
ENSGALG00010002226	7.84351	7.19164	6.90109	8.107	7.67743	8.68349	7.71281	7.11349	7.16834	7.15166	6.80173	8.41255	8.34292	8.10429	8.15236
ENSGALG00010002227	3.8557	2.92771	3.29159	2.36818	2.36818	2.36818	2.36818	2.36818	2.36818	3.13898	2.36818	2.36818	2.36818	2.36818	2.36818
ENSGALG00010002229	3.30352	2.92771	3.65355	2.92738	3.19006	3.42463	2.36818	3.9133	3.53501	3.5667	3.28561	3.3817	2.96741	2.36818	2.36818
ENSGALG00010002230	3.44225	2.36818	2.36818	2.36818	2.36818	2.36818	2.36818	2.36818	2.36818	2.36818	2.36818	2.36818	2.36818	2.36818	2.96504
ENSGALG00010002231	8.73975	8.52375	8.65093	8.61175	8.48368	8.88244	9.24428	8.48038	8.89345	8.76767	8.50631	8.28326	8.32677	8.70954	9.38609
ENSGALG00010002232	3.93813	4.68966	4.22895	2.36818	2.36818	3.12336	2.36818	3.69057	4.55155	4.02051	2.36818	2.36818	2.36818	2.36818	2.36818
ENSGALG00010002235	12.3818	12.5134	12.8437	10.8732	11.8059	11.0976	10.9656	13.261	12.1095	12.5699	12.4343	11.6148	11.4285	11.5296	11.6126
ENSGALG00010002236	2.36818	2.36818	2.36818	3.15421	2.36818	3.42463	2.36818	3.4062	2.9634	2.36818	2.36818	3.09206	2.96741	2.36818	2.36818
ENSGALG00010002237	5.75561	7.07853	6.5251	3.46686	3.19006	2.36818	4.0431	6.1565	6.84891	7.49755	5.46823	3.3817	3.54258	4.08302	2.96504
ENSGALG00010002238	5.97926	6.74936	6.39938	5.14952	5.28184	5.91978	4.27158	5.86367	5.69219	6.16651	6.39468	5.78055	5.30264	6.21253	6.48871
ENSGALG00010002239	8.63761	8.36761	8.21385	10.4032	10.5451	10.3821	10.6326	9.01958	8.52231	8.55255	9.05153	10.5718	10.861	10.3301	10.6124
ENSGALG00010002240	2.36818	2.92771	2.36818	2.36818	2.36818	3.12336	3.08366	3.22162	2.9634	2.36818	2.36818	2.36818	2.36818	2.36818	2.36818
ENSGALG00010002242	5.03265	6.2634	3.79447	5.54443	3.51578	3.42463	4.85012	4.26041	4.94739	5.10656	3.74093	2.36818	3.67284	4.20483	3.98283
ENSGALG00010002243	7.20919	7.57185	7.13278	8.00919	7.9018	7.98501	8.56352	7.88391	7.91333	7.38472	8.30758	7.82373	7.40257	7.76688	7.94752
ENSGALG00010002244	2.36818	2.92771	2.36818	2.36818	2.36818	2.36818	2.36818	2.97599	2.36818	2.36818	2.36818	2.36818	2.36818	3.10226	2.36818
ENSGALG00010002245	2.36818	2.36818	2.36818	2.36818	2.36818	2.36818	2.36818	2.36818	2.36818	2.36818	2.36818	2.36818	3.39194	2.36818	2.36818
ENSGALG00010002246	2.36818	2.36818	2.36818	3.32518	3.19006	2.36818	3.37016	2.36818	2.36818	2.36818	2.36818	2.36818	3.98872	4.08302	3.53812
ENSGALG00010002247	9.19736	9.16121	8.77144	9.94172	10.2511	10.1592	9.33394	9.41705	9.17953	8.90573	9.11095	10.303	10.3698	10.2303	9.84985
ENSGALG00010002249	4.89003	6.41794	4.39904	5.18175	3.19006	2.36818	4.78143	4.7028	4.71401	4.85929	4.05664	3.92692	3.89304	3.39571	4.3024
ENSGALG00010002250	2.36818	2.36818	2.36818	2.92738	3.95331	2.36818	2.36818	2.36818	2.36818	2.36818	3.42189	2.36818	2.36818	2.36818	2.36818
ENSGALG00010002251	7.0386	6.44432	6.68748	6.38955	5.72398	5.52124	6.70988	7.07415	6.29683	6.44271	6.74465	6.03708	6.455	6.70472	6.76393
ENSGALG00010002252	2.91444	2.92771	2.36818	2.36818	4.26834	3.12336	3.75932	3.9133	2.36818	2.36818	3.64546	2.36818	2.96741	3.39571	2.96504
ENSGALG00010002253	9.13337	9.15724	9.62248	7.82148	7.92243	7.17725	8.51322	8.77503	9.21459	8.82641	8.92051	7.21125	6.77448	6.70472	8.12945
ENSGALG00010002254	5.30799	4.73469	4.9708	4.25883	3.95331	4.81733	4.37175	5.30049	5.3846	5.10656	4.77312	2.36818	3.98872	3.94737	4.55673
ENSGALG00010002256	2.36818	2.36818	2.36818	3.15421	2.36818	2.36818	2.36818	2.36818	2.36818	2.36818	2.36818	2.36818	2.36818	2.36818	2.36818
ENSGALG00010002257	2.36818	2.36818	2.36818	2.92738	2.36818	2.36818	2.36818	2.36818	2.36818	2.36818	2.36818	2.36818	2.36818	2.36818	2.96504
ENSGALG00010002259	3.56255	3.79854	4.22895	4.38042	4.12108	3.98948	3.75932	4.53128	3.20418	3.86072	3.90973	3.09206	3.67284	3.79355	3.66794
ENSGALG00010002260	6.21697	5.54579	4.47626	6.66069	6.3628	6.72233	6.67362	7.49483	5.76561	5.07385	4.81193	6.89409	6.15777	5.58534	6.82236
ENSGALG00010002261	3.93813	4.19425	4.03167	5.63948	3.95331	3.12336	5.5247	3.4062	3.20418	4.09288	3.54014	4.65509	4.23658	3.61431	4.76954
ENSGALG00010002262	2.36818	2.36818	2.36818	2.36818	2.36818	2.36818	2.36818	2.36818	2.36818	3.30684	2.36818	2.36818	2.96741	2.36818	2.36818
ENSGALG00010002263	3.93813	3.79854	4.13432	4.59366	6.06029	5.81153	4.91549	2.97599	3.38526	3.67413	5.02401	5.88225	6.31409	5.62626	4.66739
ENSGALG00010002265	4.15531	3.32572	3.29159	2.36818	2.36818	2.36818	3.08366	3.55874	2.36818	3.13898	3.54014	3.09206	3.39194	3.10226	2.36818
ENSGALG00010002269	5.16182	5.47003	5.65189	5.70678	4.91152	5.15493	5.5247	5.69099	5.32065	4.69472	5.66744	4.87412	5.82891	4.59993	5.86471
ENSGALG00010002270	4.68767	4.38145	4.54913	4.12408	4.12108	3.83221	3.75932	5.22943	4.60795	4.28722	4.24782	4.57328	3.78851	4.51193	4.90953
ENSGALG00010002271	3.8557	2.92771	3.79447	4.1933	4.12108	5.15493	3.91005	3.4062	3.66453	3.13898	3.90973	4.18175	3.67284	3.61431	4.61322
ENSGALG00010002274	6.4582	6.50824	5.6198	3.88844	3.95331	4.96251	2.36818	5.19249	3.20418	3.67413	3.90973	5.17529	2.96741	3.10226	3.66794
ENSGALG00010002275	2.91444	2.92771	2.36818	3.32518	2.36818	2.36818	4.0431	3.22162	3.66453	3.13898	3.42189	3.77479	3.20974	2.36818	3.98283
ENSGALG00010002277	8.66183	9.37962	8.83505	10.1928	10.3982	11.4612	10.395	9.0452	7.7376	8.6452	8.79754	10.4402	10.1303	10.2866	10.7098
ENSGALG00010002278	3.56255	4.59476	3.79447	4.93844	5.62577	6.05237	4.85012	3.9133	5.07033	2.91642	3.64546	4.06115	4.07714	6.1301	5.22497
ENSGALG00010002279	2.36818	2.36818	2.36818	2.36818	2.36818	3.42463	3.08366	2.36818	2.36818	2.36818	2.36818	2.36818	3.39194	2.36818	3.388
ENSGALG00010002280	7.17964	6.49569	6.80534	5.79182	5.57398	5.98762	5.20238	7.2344	7.62478	7.37818	6.87447	5.78055	5.73326	4.83349	6.16597
ENSGALG00010002281	10.4595	10.2542	10.2519	9.3487	9.13215	8.80051	8.99591	10.3384	10.1339	10.007	10.8128	8.79967	8.42488	8.81394	9.08642
ENSGALG00010002282	9.79473	9.54062	9.62448	9.70157	9.76649	8.95996	9.9795	10.3238	9.00028	9.43393	9.51599	9.88576	10.3767	10.4149	9.56576
ENSGALG00010002283	2.36818	2.36818	2.36818	2.36818	2.36818	2.36818	2.36818	2.36818	2.36818	2.36818	2.36818	3.09206	3.54258	2.36818	2.36818
ENSGALG00010002285	13.1015	12.4246	13.2739	9.91732	9.64457	9.58071	9.64778	13.1938	13.3547	12.83	13.1111	9.00744	8.4697	9.11693	9.59281
ENSGALG00010002286	2.36818	2.92771	2.36818	2.36818	2.36818	2.36818	2.36818	2.36818	2.36818	2.91642	2.36818	3.09206	2.36818	2.36818	2.96504
ENSGALG00010002288	8.16308	8.33284	8.09183	8.45586	8.73169	8.17043	8.31607	8.59587	8.34775	8.73226	9.41921	7.8979	8.02021	8.38343	8.24054
ENSGALG00010002290	2.91444	2.92771	2.36818	4.49142	2.36818	2.36818	3.75932	2.97599	2.36818	2.36818	3.54014	2.36818	2.96741	3.39571	4.07099
ENSGALG00010002291	8.80403	8.90844	9.22626	8.83663	9.01222	8.92602	8.7661	8.94258	9.01278	8.93272	8.73555	8.71105	9.09779	8.79188	8.86577
ENSGALG00010002293	5.67247	5.04927	5.11785	8.70703	8.60346	8.8466	8.94749	4.99133	4.2254	4.50689	6.07696	8.59697	8.23453	8.60206	8.52667
ENSGALG00010002294	2.36818	2.36818	2.36818	2.36818	2.36818	2.36818	2.36818	2.36818	2.36818	2.36818	2.36818	2.36818	3.54258	2.36818	2.36818
ENSGALG00010002295	8.37327	8.43474	8.20853	7.78082	8.00212	8.20623	7.29103	8.58543	8.14911	8.06359	8.29441	8.02101	8.43245	7.70208	8.12945
ENSGALG00010002297	3.13622	3.79854	4.03167	3.69886	3.51578	3.42463	2.36818	2.36818	2.36818	3.5667	4.30548	3.59763	3.67284	2.36818	3.66794
ENSGALG00010002298	5.13064	5.21454	5.83051	5.3037	3.95331	4.36529	5.14958	5.07535	4.29767	5.28806	5.31777	5.1201	5.30264	5.31113	4.37086
ENSGALG00010002299	3.30352	2.36818	2.36818	2.36818	2.36818	2.36818	2.36818	3.55874	2.36818	2.36818	2.90375	3.09206	2.36818	2.36818	3.388
ENSGALG00010002301	2.91444	2.36818	2.36818	3.15421	2.36818	2.36818	2.36818	2.36818	2.36818	2.36818	2.36818	2.36818	2.36818	2.36818	3.20646
ENSGALG00010002303	5.09875	6.00382	5.25072	3.79776	2.36818	2.36818	3.37016	3.69057	4.94739	4.69472	3.28561	4.805	4.07714	4.08302	3.66794
ENSGALG00010002308	8.33026	8.28271	8.55764	8.86607	9.11433	8.96415	9.37957	8.18075	8.08896	8.46897	8.65283	8.97355	8.89912	8.55043	9.11469
ENSGALG00010002309	5.56115	4.54462	4.22895	4.93844	4.40004	4.36529	5.03752	5.58196	5.10898	5.07385	5.31777	4.87412	4.82584	5.15078	4.90953
ENSGALG00010002310	9.63809	9.2864	9.24979	9.34348	9.36465	9.18112	9.63608	9.26396	9.27188	9.29353	9.19485	9.49795	9.79389	9.42853	9.52597
ENSGALG00010002311	3.66965	3.79854	3.65355	2.36818	2.36818	2.36818	2.36818	2.36818	2.36818	2.36818	2.36818	2.36818	2.36818	2.36818	2.36818
ENSGALG00010002312	8.21857	8.14517	8.2712	6.34826	8.44856	7.53369	7.20483	8.8898	7.945	7.68391	8.67078	8.14799	8.01013	7.85467	6.8785
ENSGALG00010002315	6.30198	5.91194	6.30231	5.79182	5.62577	5.56655	5.71668	5.93169	6.10364	5.93549	5.91319	6.52872	6.55575	5.9494	5.69881
ENSGALG00010002318	3.76668	3.69959	5.16357	4.38042	3.19006	5.15493	2.36818	4.403	5.32065	4.77952	4.12376	4.06115	4.56415	4.31567	2.36818
ENSGALG00010002320	2.36818	2.36818	2.36818	2.36818	2.36818	2.36818	2.36818	2.36818	3.53501	3.13898	2.36818	2.36818	2.96741	2.36818	2.96504
ENSGALG00010002321	2.36818	2.92771	3.0266	2.36818	2.36818	2.36818	2.36818	2.36818	2.36818	2.36818	2.36818	2.36818	2.36818	2.36818	2.36818
ENSGALG00010002322	6.06298	5.68609	5.44737	6.03752	4.26834	3.64872	5.39554	5.95366	5.74156	5.39711	5.91319	6.32806	5.63068	4.41755	5.11497
ENSGALG00010002324	2.36818	2.36818	3.0266	3.15421	2.36818	2.36818	3.08366	2.36818	2.36818	2.36818	2.36818	3.09206	2.36818	2.36818	3.388
ENSGALG00010002325	2.36818	2.92771	3.29159	3.15421	2.36818	2.36818	2.36818	2.36818	4.06671	3.94339	2.36818	2.36818	3.78851	3.39571	2.96504
ENSGALG00010002328	3.8557	4.38145	4.47626	4.38042	4.51944	3.64872	4.46461	4.26041	3.38526	3.5667	4.73316	3.92692	4.96145	4.90312	3.78323
ENSGALG00010002329	11.0171	10.7612	10.8784	11.0053	10.7637	10.7967	10.8569	10.8655	10.7872	10.8187	10.912	10.8144	10.8687	10.9097	11.1491
ENSGALG00010002330	2.36818	3.88926	4.13432	3.69886	3.51578	3.64872	4.27158	4.01002	3.88354	2.36818	3.54014	3.3817	4.37784	3.39571	4.3024
ENSGALG00010002331	3.13622	2.92771	3.0266	2.36818	2.36818	2.36818	3.37016	2.97599	2.36818	3.67413	3.54014	3.09206	3.20974	2.36818	3.53812
ENSGALG00010002332	11.0332	12.0029	10.8263	13.8264	14.9985	15.5545	14.7775	10.7156	10.5263	11.0829	11.0662	15.0903	14.6697	15.0135	14.426
ENSGALG00010002333	7.21648	8.99103	8.26094	5.77103	4.99399	5.77353	6.49803	6.75128	8.52581	7.6786	6.31836	6.68619	6.06292	6.07238	5.22497
ENSGALG00010002334	8.17809	7.81304	7.88025	8.58544	7.93264	8.83293	9.04983	8.00903	8.15814	8.29615	8.32388	7.93751	8.3227	7.7578	8.60848
ENSGALG00010002335	7.73604	8.34685	7.72468	6.9171	6.9906	7.0568	8.00266	8.4111	8.13087	7.04838	7.66073	6.74105	6.17601	6.41161	7.45943
ENSGALG00010002336	6.30198	6.21819	5.83051	6.97238	6.1684	6.20245	7.02961	6.72609	6.04608	6.37849	7.32712	6.75888	6.56958	6.86577	6.82236
ENSGALG00010002337	3.13622	2.36818	3.65355	2.92738	2.36818	2.36818	3.08366	4.403	2.9634	2.91642	2.36818	3.77479	3.67284	3.39571	3.66794
ENSGALG00010002338	12.7444	13.052	12.8718	10.9405	11.055	10.3915	10.413	12.7841	12.5608	12.8555	13.0631	10.3075	10.2888	10.5577	10.4972
ENSGALG00010002339	4.92711	4.25981	4.61815	4.93844	4.72982	4.89186	3.91005	5.26541	5.07033	4.65021	3.90973	5.17529	5.08479	4.20483	4.3024
ENSGALG00010002340	8.77718	9.30804	9.21568	8.22913	7.97275	8.30858	8.54361	8.98026	8.62035	8.90573	8.93543	8.12072	8.21272	8.30459	8.37129
ENSGALG00010002341	9.34592	9.244	9.5443	9.87087	10.2223	10.8587	10.1356	9.79932	9.15943	9.24232	9.65899	10.3797	10.2929	10.5707	10.1177
ENSGALG00010002342	11.6155	10.4655	11.3267	11.1415	11.618	12.1517	11.2094	11.671	11.8297	10.988	10.5871	11.535	11.4123	11.0723	11.2957
ENSGALG00010002343	10.2981	10.0638	9.57153	9.03329	8.98306	8.81912	9.42924	10.1182	9.5039	9.84005	9.66923	8.51033	9.07138	8.96748	9.16737
ENSGALG00010002345	6.47048	6.27816	6.30231	7.83147	7.44047	6.53184	7.53254	6.68747	6.12232	6.08823	6.19565	7.13145	7.70101	7.39745	8.0825
ENSGALG00010002346	4.68767	4.73469	4.74626	4.77709	5.34535	4.73844	4.0431	4.7028	3.88354	4.85929	5.36974	3.59763	5.0449	4.41755	5.32688
ENSGALG00010002347	9.2373	8.87741	8.76056	8.57952	8.48368	8.24804	8.74881	8.86986	8.71826	8.96358	8.87257	8.30764	8.70347	8.181	8.75338
ENSGALG00010002348	7.58653	7.85777	7.74691	7.86103	7.65295	7.98501	8.21268	7.86676	7.37634	7.66793	7.46291	7.67229	8.31043	7.73021	7.81015
ENSGALG00010002349	10.51	10.087	10.7095	10.2892	8.41983	10.1482	10.0831	9.81579	9.79485	9.87641	9.55102	9.11151	8.62308	8.63714	10.2626
ENSGALG00010002350	6.97119	7.22998	7.79036	6.42969	6.75752	6.87274	5.97822	7.10375	6.95656	6.45521	7.15546	5.51026	6.455	5.49975	6.27066
ENSGALG00010002351	4.3395	3.97323	3.0266	3.15421	2.36818	3.12336	2.36818	2.97599	3.20418	3.77145	2.36818	3.09206	3.39194	2.36818	2.36818
ENSGALG00010002352	11.1251	10.7703	11.0468	10.383	10.6662	10.323	10.3556	11.0458	10.9469	10.6131	10.9169	10.3433	10.0103	10.3255	10.436
ENSGALG00010002353	5.09875	5.44384	5.55334	4.64195	5.85959	6.89048	5.14958	5.71699	6.31316	5.31613	5.02401	6.52872	5.98221	6.58636	5.07627
ENSGALG00010002354	2.91444	3.32572	3.49004	2.92738	3.19006	2.36818	2.36818	2.36818	3.38526	2.91642	2.36818	3.09206	2.36818	3.10226	2.96504
ENSGALG00010002355	9.50758	9.75799	9.54641	9.79637	10.4037	9.9194	10.0951	9.92472	9.49502	9.63627	10.0086	9.98735	9.90548	9.92858	9.75874
ENSGALG00010002356	7.04681	7.98865	6.45462	9.63186	9.19282	10.738	10.4061	7.24329	7.02738	7.67328	7.12599	9.5803	9.74763	10.3857	11.1278
ENSGALG00010002357	9.62856	9.60468	9.5079	9.18313	9.72013	9.67313	9.19409	9.15284	8.82137	9.33626	9.44923	9.79167	9.43188	9.48462	8.86854
ENSGALG00010002358	6.24588	5.41715	5.16357	7.3306	5.67573	6.6616	8.07381	7.17056	4.81225	5.07385	6.10757	6.46491	7.15953	5.9494	8.74134
ENSGALG00010002359	8.27549	8.33986	8.31648	9.06114	8.61618	8.72849	8.47168	8.77809	8.14002	8.45972	8.48327	8.64081	8.53091	8.66653	8.97775
ENSGALG00010002360	9.25333	8.79807	9.13093	8.64043	7.27377	8.75773	8.60733	8.46906	8.49048	8.69597	8.63987	7.49243	7.18666	7.65394	8.16143
ENSGALG00010002361	10.4127	10.4981	10.2571	10.3206	10.3285	10.3977	10.3442	10.4462	10.3562	10.306	10.3136	10.1479	10.4116	10.245	10.471
ENSGALG00010002362	4.50023	5.59412	5.58696	2.92738	2.36818	2.36818	2.36818	5.36811	6.56563	5.04035	5.56026	2.36818	2.96741	3.10226	4.22999
ENSGALG00010002364	7.97394	8.16111	7.52475	9.91145	9.05019	9.76478	9.94198	8.89827	7.81962	7.69447	7.61377	9.05502	8.8349	7.76688	10.5017
ENSGALG00010002365	9.97521	9.38642	9.65025	8.19859	7.61542	7.79116	7.56255	9.67516	10.3364	9.65934	9.17343	7.67229	6.91099	7.32549	7.99393
ENSGALG00010002366	3.56255	3.88926	3.65355	4.54354	3.19006	4.2523	3.08366	4.7028	4.49261	4.65021	4.18736	3.59763	3.20974	5.20631	4.22999
ENSGALG00010002367	2.36818	2.36818	2.36818	3.46686	2.36818	3.98948	4.55124	2.36818	2.36818	2.36818	2.36818	2.36818	2.36818	2.36818	4.49769
ENSGALG00010002368	9.36079	9.12305	9.21302	9.44127	10.1586	10.0512	9.52625	9.35488	9.0761	9.08281	9.13701	9.80029	9.61426	9.76156	9.44479
ENSGALG00010002369	7.38128	7.39426	7.61615	7.78082	8.71996	7.76259	7.98799	7.2344	7.5784	7.47934	7.69624	7.8736	8.03022	8.08264	7.83869
ENSGALG00010002370	7.19449	7.02719	6.99085	6.68297	6.8028	7.14807	6.55898	7.17056	7.34502	7.31115	7.24727	6.22897	7.02567	6.66634	7.41461
ENSGALG00010002371	10.4402	10.0575	10.9811	10.6189	12.0919	11.2899	10.8719	10.5802	10.5202	10.1081	10.1163	11.6822	11.654	10.7868	10.3991
ENSGALG00010002372	8.51593	8.32932	8.25578	8.07793	7.60269	7.10316	8.00993	8.7028	8.28315	8.3236	8.53178	7.29908	8.67185	7.82889	8.34369
ENSGALG00010002373	14.3507	14.6025	14.4427	7.79109	8.68418	7.42844	8.4611	14.4543	14.231	14.7731	14.9862	7.77208	6.99529	7.04087	8.02406
ENSGALG00010002374	13.1818	12.9328	12.6754	10.956	11.8577	11.3999	10.7717	12.9903	12.5405	12.7772	12.5453	11.8673	12.2643	11.9906	11.1967
ENSGALG00010002375	6.86374	7.06162	6.34194	10.3642	8.27499	9.6104	9.18126	6.75128	6.34528	7.04838	7.2541	6.52872	6.90009	9.08099	10.4077
ENSGALG00010002376	8.40231	8.50201	8.14858	7.54618	7.56382	7.24772	7.7217	8.57842	8.19811	8.18455	8.66311	7.55491	8.38253	7.93741	7.77514
ENSGALG00010002377	3.93813	2.36818	3.0266	2.92738	2.36818	2.36818	3.08366	3.55874	3.66453	3.30684	2.36818	3.09206	2.36818	3.10226	2.96504
ENSGALG00010002378	7.30808	6.7173	7.86	7.19007	7.4547	7.20586	7.19208	7.34594	7.0567	7.29041	7.2541	7.71851	7.17767	7.72089	7.00491
ENSGALG00010002379	9.44848	9.02192	9.16157	8.40995	8.26695	8.05736	8.32776	8.62335	8.97495	8.79978	8.79988	8.11383	8.22149	8.23433	8.71388
ENSGALG00010002380	7.407	7.96158	7.9329	6.66069	7.0292	5.3238	6.69186	10.3435	7.54434	7.28343	6.93524	6.89409	6.66284	9.36121	6.16597
ENSGALG00010002381	9.43293	9.28276	9.06761	9.27196	9.19282	9.33129	9.43195	9.13147	9.35475	9.07678	9.05739	9.35612	9.89456	9.37612	9.43548
ENSGALG00010002382	4.7723	4.90107	4.80599	4.73355	4.99399	4.81733	4.37175	6.39937	4.55155	5.84297	7.80243	3.09206	3.67284	4.41755	4.37086
ENSGALG00010002383	9.41562	9.52684	9.61847	8.87092	9.27128	9.93014	9.45077	9.18086	9.35475	9.6349	9.35565	9.09409	9.39169	9.14505	8.87956
ENSGALG00010002384	11.3628	11.2098	11.2722	8.81666	8.19248	7.77218	8.47694	11.1302	10.8938	11.0627	10.7266	8.42931	8.68774	8.16735	8.95186
ENSGALG00010002385	6.09514	6.1715	6.47256	6.61505	6.23618	5.73449	6.49803	6.84783	5.98609	6.10423	6.65454	6.06613	6.67568	6.15811	7.53115
ENSGALG00010002386	4.64325	4.86135	3.91923	4.54354	2.36818	3.98948	3.08366	5.11551	3.66453	4.28722	2.90375	3.3817	3.78851	3.39571	3.20646
ENSGALG00010002387	9.70306	9.81073	9.60435	9.61895	9.9758	9.89548	9.95899	9.84963	9.60148	9.61976	9.83529	9.99863	10.1396	9.79078	9.57597
ENSGALG00010002388	2.36818	2.36818	3.29159	2.92738	2.36818	2.36818	3.37016	2.97599	2.9634	2.36818	2.36818	2.36818	2.36818	2.36818	2.36818
ENSGALG00010002389	8.30655	8.10038	8.54924	9.75369	9.18003	8.84206	10.1256	9.48604	8.0555	8.88975	8.77639	10.0716	10.0292	10.9189	9.92892
ENSGALG00010002390	2.36818	2.36818	2.36818	2.92738	2.36818	2.36818	2.36818	2.97599	2.36818	2.36818	2.36818	3.09206	2.96741	2.36818	2.36818
ENSGALG00010002391	8.6019	8.03265	8.31648	8.02233	6.33218	7.77218	7.53254	8.38324	8.63983	8.07575	8.50345	6.22897	6.68841	7.01058	7.40701
ENSGALG00010002392	8.63761	8.77753	8.68585	7.80129	7.64055	7.26141	8.18081	8.64698	8.70907	8.93494	9.11658	7.52401	7.55604	7.87999	8.13866
ENSGALG00010002393	10.4214	10.5685	10.1583	9.80146	9.70235	9.52512	9.37112	10.3992	9.79919	10.1905	10.3104	8.59697	8.50602	8.79188	9.48325
ENSGALG00010002394	2.91444	2.36818	2.36818	2.92738	2.36818	3.12336	3.08366	2.97599	2.36818	2.36818	2.90375	2.36818	2.36818	3.10226	2.36818
ENSGALG00010002395	9.96983	10.1808	10.1541	10.3338	11.5012	11.2807	10.7217	10.1981	9.57812	10.2445	10.0765	11.2879	11.2797	11.0977	10.4462
ENSGALG00010002396	8.96191	9.30804	8.88932	9.07381	9.06418	9.07284	9.06736	9.39928	8.93871	9.23872	9.41313	9.08354	9.53916	9.10266	9.25253
ENSGALG00010002397	5.38885	4.97717	3.0266	4.73355	3.75681	4.12801	5.64299	5.26541	5.50437	5.72334	2.90375	4.18175	3.78851	4.08302	2.36818
ENSGALG00010002398	4.64325	4.93965	4.86318	4.49142	5.28184	2.36818	4.46461	6.63429	4.29767	6.41737	7.95256	4.18175	3.20974	3.39571	3.20646
ENSGALG00010002399	3.56255	3.69959	3.79447	3.15421	2.36818	3.42463	3.08366	2.97599	3.66453	5.10656	4.46419	2.36818	4.30919	3.39571	3.78323
ENSGALG00010002400	7.48756	7.46023	7.40867	8.46872	7.82718	8.11877	8.24387	7.70889	7.59181	7.33834	7.74063	7.86541	7.80382	7.91308	8.35953
ENSGALG00010002401	10.1566	9.8082	9.84477	10.2646	11.1716	11.0716	10.5565	9.82913	9.67726	9.84716	9.74621	10.9513	10.8484	10.7089	10.2253
ENSGALG00010002402	9.30208	9.38811	9.57774	11.031	11.4426	11.5661	11.5034	8.98821	9.25514	9.05033	8.88141	11.3906	11.525	10.9561	11.5859
ENSGALG00010002403	5.19231	6.34976	6.32226	6.48151	7.20803	7.08787	6.81348	6.56493	6.10364	6.13571	4.36061	6.52872	6.34662	7.12809	6.79927
ENSGALG00010002404	9.51793	9.42159	9.26269	9.50348	9.66	9.51088	9.86185	9.41509	9.02764	9.18922	9.41161	9.4631	9.46177	9.41127	9.77802
ENSGALG00010002405	6.65389	6.07327	6.39938	3.15421	4.40004	4.2523	3.58388	6.80036	6.31316	6.5746	6.73492	3.59763	4.87257	3.94737	3.78323
ENSGALG00010002406	4.89003	6.58137	6.21962	6.05477	5.40609	5.15493	5.91721	6.93829	6.14076	6.0054	7.70622	5.06262	6.72593	5.40861	6.4447
ENSGALG00010002407	3.13622	3.46747	2.36818	2.92738	2.36818	2.36818	2.36818	3.4062	2.36818	3.5667	2.36818	2.36818	2.36818	2.36818	2.36818
ENSGALG00010002408	8.7245	8.88223	8.647	8.59426	8.70813	8.72849	8.52342	8.65032	8.75445	8.69071	8.72577	8.45683	8.74963	8.26669	8.62495
ENSGALG00010002409	9.66895	9.17501	9.6404	10.0988	10.4382	10.139	10.2552	9.8306	10.2151	9.37449	9.87343	10.425	10.1851	10.412	10.2499
ENSGALG00010002410	8.39912	8.43801	8.58668	8.52826	8.21773	8.58361	8.54861	8.2441	8.73647	8.91026	8.78583	8.69265	7.86664	8.51316	8.49834
ENSGALG00010002411	5.16182	5.33389	6.36134	6.79971	6.47913	6.53184	6.14698	5.74251	7.08543	6.0054	6.55839	6.44299	5.75779	7.02581	6.33642
ENSGALG00010002412	2.36818	2.36818	2.36818	2.92738	2.36818	2.36818	3.08366	2.97599	3.38526	2.36818	3.42189	2.36818	2.36818	2.36818	2.36818
ENSGALG00010002413	7.5809	7.93864	7.49878	7.78082	7.70151	7.74322	7.81604	7.84357	6.87109	7.21172	7.45108	7.33514	7.75031	8.15358	8.07292
ENSGALG00010002414	9.28139	9.06915	7.18803	6.32006	5.90206	6.11431	5.94804	8.363	6.22956	7.72052	7.74063	7.62454	7.23944	7.72089	6.94309
ENSGALG00010002415	3.30352	4.19425	2.36818	3.88844	2.36818	3.42463	3.58388	3.69057	2.9634	4.40176	2.36818	2.36818	3.20974	2.36818	4.90953
ENSGALG00010002416	7.61439	8.09624	7.58358	4.68853	5.34535	3.98948	5.48295	7.861	6.89294	7.91357	7.50357	6.27937	6.37843	3.79355	4.90953
ENSGALG00010002417	3.30352	2.36818	2.36818	3.88844	3.19006	3.12336	3.58388	2.97599	2.36818	2.36818	3.42189	2.36818	3.39194	3.94737	3.20646
ENSGALG00010002418	9.48362	9.2864	9.49264	9.41495	9.23052	9.45545	9.83958	9.41509	9.06894	9.09481	9.387	9.714	9.44129	9.54125	9.7839
ENSGALG00010002419	8.7673	8.49888	8.46238	7.80637	8.56463	8.17766	8.16786	8.90668	9.21675	8.54964	8.54852	8.34347	7.55604	7.49906	7.95796
ENSGALG00010002420	2.36818	2.36818	2.36818	2.36818	2.36818	3.12336	3.08366	2.97599	2.9634	2.36818	4.05664	3.3817	2.36818	2.36818	2.96504
ENSGALG00010002421	3.44225	4.38145	4.31686	3.69886	3.19006	4.12801	3.37016	5.11551	3.97873	3.86072	4.41345	3.3817	2.36818	3.39571	2.36818
ENSGALG00010002422	8.51297	8.68958	8.54078	8.45586	8.71406	8.43465	8.48217	8.39525	8.30772	8.27873	8.57599	8.17476	8.65577	8.46935	8.36346
ENSGALG00010002423	8.10144	7.4342	7.47234	3.97238	4.26834	4.46906	6.27381	8.41897	4.71401	5.52248	7.69624	6.00743	3.39194	3.79355	3.53812
ENSGALG00010002424	10.3303	10.3399	10.2125	10.3117	10.4595	10.1128	10.3513	10.4258	10.2462	10.1422	10.3483	10.3135	10.7397	10.0691	10.5645
ENSGALG00010002425	7.23815	7.367	6.91426	7.83147	7.4547	7.8284	6.91012	7.10375	7.31299	7.57957	7.24727	7.69095	6.73822	7.43212	6.99479
ENSGALG00010002427	7.66323	7.87721	7.7688	7.78082	7.42608	7.65268	7.92781	7.7778	7.59181	7.83466	7.48048	7.18514	7.49226	7.58373	7.93171
ENSGALG00010002428	3.13622	3.15467	3.79447	4.77709	4.99399	6.17367	5.78672	3.69057	4.71401	4.22579	3.54014	5.32878	3.98872	4.20483	5.39091
ENSGALG00010002429	5.81491	5.18303	4.03167	5.01247	4.40004	4.46906	4.37175	4.99133	3.53501	3.13898	4.41345	3.3817	4.91773	4.83349	5.11497
ENSGALG00010002430	11.4657	11.4174	11.4212	11.1157	10.9295	11.2545	11.096	11.3074	11.5694	11.8735	11.5316	11.3197	11.1503	11.3236	11.0304
ENSGALG00010002431	9.3055	9.07337	8.97653	8.10288	8.1581	7.65268	8.28642	9.05785	8.76926	9.40853	8.81379	7.73659	7.79797	8.13266	8.27853
ENSGALG00010002432	6.24588	5.98591	6.54219	6.6266	5.77064	6.28547	5.3023	6.67436	6.26359	6.45521	6.23774	5.70845	6.02313	6.56564	5.99296
ENSGALG00010002433	10.2825	10.4607	10.2596	12.6201	12.9463	12.892	12.6575	10.4841	9.78905	10.525	10.1275	13.0575	13.1305	12.67	12.7933
ENSGALG00010002434	8.61022	8.50514	7.37099	5.70678	6.39278	6.43831	6.09292	7.47986	6.9251	8.38678	6.80173	5.74496	6.15777	5.5432	5.84217
ENSGALG00010002435	3.30352	3.69959	3.29159	9.79254	9.99052	10.3376	10.0305	2.97599	3.53501	2.91642	4.84966	9.68637	9.69512	9.65561	9.97591
ENSGALG00010002436	7.17964	7.94326	6.59227	5.91051	4.26834	5.37583	6.14698	6.85945	6.1947	7.27642	5.93044	5.94622	5.70831	5.91692	5.69881
ENSGALG00010002437	6.88221	8.01521	7.29253	7.7962	6.50679	6.6616	7.97318	8.18075	8.09368	7.53327	8.66311	7.47098	8.32677	8.40103	8.30331
ENSGALG00010002438	7.49357	7.8231	7.83255	7.93701	7.39688	7.59981	7.89675	7.53882	7.4881	6.96356	7.53192	7.08983	7.37139	8.23433	7.65189
ENSGALG00010002439	3.56255	4.86135	4.31686	2.36818	3.19006	3.12336	2.36818	3.80759	3.20418	3.67413	3.74093	3.09206	2.36818	3.39571	2.36818
ENSGALG00010002440	4.64325	5.21454	4.86318	4.54354	4.40004	5.09373	4.85012	5.49426	4.85881	5.10656	5.86014	4.39248	4.91773	4.76008	4.49769
ENSGALG00010002441	10.6301	10.7275	10.9132	11.1121	11.5199	11.5995	11.4123	10.8379	11.0328	10.8307	10.8837	11.6775	11.2071	11.3105	11.2234
ENSGALG00010002442	3.13622	2.36818	3.65355	3.15421	2.36818	2.36818	2.36818	3.22162	2.36818	2.36818	3.28561	3.09206	2.96741	2.36818	3.20646
ENSGALG00010002443	8.5738	8.32932	8.73114	9.03545	9.0074	8.96415	8.4289	8.25732	8.3867	8.67747	8.31738	8.73821	8.9208	8.57648	8.70771
ENSGALG00010002444	8.8702	8.55426	9.15881	9.16941	9.61003	9.61307	9.07778	9.11946	8.53624	8.7194	8.85025	9.37644	9.57378	9.12047	9.01071
ENSGALG00010002445	9.89007	9.881	10.1346	8.71515	8.70218	8.15585	8.76179	10.0914	9.84045	9.75441	9.69452	8.58205	8.52384	8.70954	8.85743
ENSGALG00010002446	4.73065	3.88926	3.65355	6.24701	6.63762	6.3121	7.00066	5.07535	4.81225	2.91642	4.56009	6.20309	6.06292	6.15811	7.28781
ENSGALG00010002447	5.13064	5.18303	5.25072	5.87204	4.12108	4.56511	3.37016	4.53128	2.9634	3.86072	2.90375	3.09206	4.07714	3.10226	2.36818
ENSGALG00010002448	10.4206	10.5291	10.4398	10.3931	10.6753	10.6627	11.0206	10.2563	10.2205	10.2623	10.2417	10.614	10.3619	10.5259	10.8298
ENSGALG00010002449	7.44474	7.24503	6.95306	7.47784	7.67743	7.589	7.74804	6.77603	7.16834	6.74709	6.90083	7.04697	7.64346	7.36192	7.10238
ENSGALG00010002450	6.18748	6.07327	6.67205	6.51918	6.1684	6.43831	6.72768	6.1565	6.64508	6.02236	6.18135	6.723	6.62361	6.23899	6.1106
ENSGALG00010002451	4.8127	4.32209	4.13432	4.49142	3.51578	3.98948	2.36818	3.9133	2.36818	4.50689	3.12136	2.36818	3.78851	2.36818	2.36818
ENSGALG00010002453	11.4028	11.4783	11.1955	11.2081	10.8114	10.8666	11.1604	11.2802	11.3101	11.2884	11.2121	10.8059	11.7064	11.2807	11.4961
ENSGALG00010002454	3.66965	3.59031	4.22895	4.54354	4.62881	5.47442	4.91549	3.69057	4.2254	3.30684	3.64546	4.18175	4.23658	4.31567	5.11497
ENSGALG00010002455	9.18441	9.13319	9.20502	9.1909	9.29124	9.03353	9.18448	9.19466	9.33298	8.81678	9.10719	9.16586	9.39943	8.86977	9.1919
ENSGALG00010002456	12.2411	12.5296	12.4886	11.069	10.555	8.47041	10.4321	11.815	11.9047	12.086	12.2344	9.91184	9.8244	7.28812	10.135
ENSGALG00010002457	8.25794	8.79296	7.58358	5.91051	4.51944	5.52124	4.16268	7.25213	6.61908	6.83571	5.62554	6.46491	4.50497	5.58534	5.39091
ENSGALG00010002458	6.90045	6.80126	6.74762	5.89141	4.26834	5.3238	5.91721	6.70046	6.57918	6.82613	6.8921	5.63248	5.30264	5.66603	5.84217
ENSGALG00010002459	9.57289	9.3276	9.53582	9.61172	9.91021	9.74788	9.67777	9.7425	9.73876	9.27783	9.58251	9.63912	9.788	9.70602	9.94081
ENSGALG00010002460	8.32689	8.33986	8.43982	8.67966	8.83864	9.0013	8.82501	8.43844	8.47971	8.48121	8.07702	8.94275	8.8854	8.75129	8.60848
ENSGALG00010002461	8.10537	7.97968	8.36038	8.03967	8.71406	7.75294	7.88888	8.15744	8.62361	7.91808	7.83919	8.28939	8.26028	7.81144	8.36738
ENSGALG00010002462	6.51858	7.73527	7.54181	9.46551	8.1581	8.37928	9.69817	8.83796	8.46523	8.09976	9.62915	9.43571	9.8683	9.7271	9.60615
ENSGALG00010002463	7.93471	7.27468	7.26197	7.14268	7.33664	7.81918	7.22999	7.45711	6.9251	7.31115	6.68521	6.86146	6.33045	6.29047	7.00491
ENSGALG00010002464	9.64215	9.4364	9.6871	8.98491	9.00256	9.0175	9.33972	9.64699	9.60148	9.50458	9.41161	8.80396	9.12607	9.12401	9.39572
ENSGALG00010002465	3.13622	2.36818	3.0266	3.58963	2.36818	3.42463	3.08366	2.97599	3.88354	3.77145	3.54014	2.36818	2.36818	2.36818	2.96504
ENSGALG00010002466	7.5809	7.69749	8.0626	7.75481	7.58985	8.26851	7.87301	7.4026	7.74361	7.66256	7.43916	7.9218	7.96387	7.94543	7.67739
ENSGALG00010002467	6.57652	7.11996	6.80534	7.90899	6.50679	7.51096	7.43858	6.55064	6.45233	6.15119	7.415	6.64841	6.455	7.11392	7.51709
ENSGALG00010002468	4.39535	4.19425	3.65355	3.79776	3.75681	3.98948	3.75932	3.55874	2.9634	3.67413	3.12136	3.3817	3.20974	3.10226	2.36818
ENSGALG00010002469	2.36818	2.92771	2.36818	3.97238	3.75681	2.36818	3.08366	2.36818	2.36818	2.36818	2.36818	3.09206	2.36818	3.61431	2.96504
ENSGALG00010002470	6.50671	7.02719	6.38049	7.69587	7.77141	7.7817	7.67669	6.82429	6.75658	6.70587	6.52485	7.64383	7.31514	7.95341	7.55199
ENSGALG00010002471	7.11085	7.37387	6.60859	7.34463	7.10342	7.21995	7.26692	7.59546	6.21224	6.98953	6.96051	7.41593	7.50668	7.02581	8.219
ENSGALG00010002472	10.234	10.0744	10.3806	10.4124	10.7113	10.5765	10.1406	10.0221	10.4712	10.3797	10.0166	10.9001	10.6148	10.4547	10.2489
ENSGALG00010002473	6.62124	8.27173	7.71719	7.16657	6.47913	6.61964	7.33806	6.93829	7.80243	8.05132	5.20762	6.44299	6.62361	7.34988	6.7277
ENSGALG00010002474	8.42765	8.66183	8.47131	8.71784	9.26726	9.71099	8.92458	8.80234	8.237	8.51435	8.77875	8.68336	8.40962	8.72824	8.68275
ENSGALG00010002475	6.62124	6.56944	6.84716	5.36088	5.62577	5.56655	5.85346	6.11818	7.04699	6.83571	6.78296	5.94622	5.30264	6.01221	5.45214
ENSGALG00010002476	14.3542	14.5419	14.2076	13.6278	13.6043	13.5211	14.0214	14.4482	14.1314	14.1062	13.7104	13.6885	14.0177	13.8308	13.871
ENSGALG00010002478	9.49715	9.78653	9.64829	10.5435	11.7536	11.6008	10.4628	9.75808	9.30885	9.9498	9.99441	11.8367	10.8631	11.9449	10.4509
ENSGALG00010002480	4.92711	5.27549	4.74626	3.32518	3.19006	3.42463	3.08366	5.26541	4.90382	5.78441	5.08797	2.36818	3.54258	3.39571	3.20646
ENSGALG00010002481	6.89136	7.84795	7.26197	8.90914	7.7134	7.49945	9.5439	8.62335	7.76743	7.77624	9.11283	8.28939	9.37608	8.86555	9.1447
ENSGALG00010002482	4.08723	3.69959	3.79447	3.46686	2.36818	3.64872	2.36818	4.80598	4.55155	4.22579	3.74093	3.77479	3.39194	3.94737	4.61322
ENSGALG00010002483	6.21697	7.03587	6.79113	6.84979	6.23618	6.36393	6.94093	6.81238	6.78023	6.37849	6.76393	6.86146	6.46983	6.26496	6.62636
ENSGALG00010002484	7.30808	6.77035	7.36141	4.38042	4.82372	4.12801	4.85012	6.84783	7.07592	6.83571	7.04956	4.73215	5.52005	5.49975	3.53812
ENSGALG00010002485	7.407	6.5932	7.63217	3.88844	5.62577	4.96251	5.3023	6.80036	7.25518	7.05659	7.15546	4.65509	5.16127	5.36072	3.78323
ENSGALG00010002486	2.36818	2.36818	2.36818	2.36818	2.36818	2.36818	2.36818	2.36818	2.36818	2.36818	2.36818	2.36818	2.36818	2.36818	2.36818
ENSGALG00010002487	8.89084	9.04143	8.94484	9.38644	9.32261	9.16666	9.07084	9.14101	8.9902	8.84073	9.16441	9.64152	9.6504	9.62099	9.13553
ENSGALG00010002491	3.44225	3.46747	2.36818	3.15421	2.36818	2.36818	3.08366	2.97599	3.20418	3.13898	2.36818	2.36818	2.36818	2.36818	2.36818
ENSGALG00010002492	13.7345	13.4401	13.7128	14.0855	14.2501	14.1114	14.054	13.3254	13.4973	13.7961	13.577	14.2902	14.0756	14.0225	13.9832
ENSGALG00010002493	4.01505	3.15467	3.65355	3.15421	3.19006	3.12336	3.08366	3.80759	3.38526	2.91642	3.54014	3.09206	3.20974	3.10226	2.96504
ENSGALG00010002494	7.23815	7.31803	7.03973	8.02233	7.98261	8.11877	8.04577	7.84357	7.42209	6.9371	7.2266	7.97607	7.90523	7.92124	8.16594
ENSGALG00010002495	2.36818	3.46747	2.36818	2.36818	2.36818	2.36818	3.91005	2.36818	2.9634	2.36818	3.74093	2.36818	2.36818	2.36818	2.96504
ENSGALG00010002496	2.36818	3.32572	2.36818	2.36818	2.36818	2.36818	3.37016	3.22162	2.9634	2.36818	3.9855	2.36818	2.36818	2.36818	2.36818
ENSGALG00010002497	4.73065	3.97323	4.31686	4.38042	4.12108	4.6546	4.37175	4.01002	4.06671	3.86072	4.51303	3.77479	4.23658	4.68241	4.15308
ENSGALG00010002498	2.36818	2.92771	3.0266	2.36818	2.36818	3.12336	2.36818	2.97599	2.36818	2.91642	2.36818	2.36818	2.36818	2.36818	2.96504
ENSGALG00010002500	9.70695	9.13924	9.68902	6.44282	6.06029	5.84854	6.76262	9.20152	9.80782	9.70309	9.68319	6.86146	7.04557	7.60414	6.3682
ENSGALG00010002501	7.30808	7.27468	7.06357	6.7688	6.58671	6.57641	7.08583	7.12316	7.36858	7.22635	7.11853	6.1225	6.26386	6.68566	6.92188
ENSGALG00010002502	2.36818	2.36818	2.36818	2.36818	2.36818	2.36818	2.36818	2.36818	2.36818	2.36818	2.36818	2.36818	2.96741	2.36818	3.20646
ENSGALG00010002503	3.56255	3.69959	2.36818	2.92738	2.36818	2.36818	4.55124	3.22162	2.36818	2.91642	3.64546	3.09206	2.36818	3.61431	3.388
ENSGALG00010002504	11.8041	11.9909	11.8152	11.3147	11.4586	11.3734	11.3129	11.9917	11.4876	11.559	11.5984	11.2624	11.7563	11.4883	11.5437
ENSGALG00010002505	2.36818	2.36818	3.0266	2.36818	2.36818	2.36818	2.36818	2.36818	2.36818	2.91642	2.36818	2.36818	2.36818	2.36818	2.36818
ENSGALG00010002507	6.83557	7.06162	6.79113	6.17003	6.75752	6.43831	6.92561	6.53621	6.6059	6.82613	6.64417	6.68619	7.0652	7.5207	6.70303
ENSGALG00010002511	9.85666	9.65339	9.59008	9.33122	9.20128	9.11487	9.53888	9.5175	9.74177	9.50458	9.66156	9.09058	9.50727	9.40256	9.68995
ENSGALG00010002512	8.2366	8.22698	8.86921	8.11928	8.11395	8.14113	8.20636	8.22179	8.79844	8.59821	8.55129	8.44038	7.75635	7.87999	7.97863
ENSGALG00010002513	7.43852	7.86265	7.57532	3.58963	3.75681	3.12336	3.37016	7.41839	7.29671	5.13851	4.77312	4.57328	4.15947	3.61431	3.98283
ENSGALG00010002518	4.68767	5.0137	5.07056	5.94797	5.85959	5.81153	4.46461	5.30049	5.44577	5.70238	4.69196	5.46705	4.44297	6.23899	6.21927
ENSGALG00010002520	6.97119	6.49569	6.34194	6.34826	7.55062	6.89048	6.98596	6.66113	5.71709	6.39157	6.58032	6.46491	6.06292	6.72354	7.13038
ENSGALG00010002522	8.2685	9.58709	8.75692	6.79971	6.33218	6.57641	6.49803	8.19456	8.39437	9.14759	8.11123	5.88225	5.26862	6.23899	6.14775
ENSGALG00010002523	5.33547	5.18303	5.55334	4.38042	4.91152	4.36529	3.58388	4.7028	5.32065	4.85929	5.05636	4.57328	4.44297	4.59993	4.55673
ENSGALG00010002525	2.91444	3.46747	4.22895	2.36818	2.36818	2.36818	2.36818	2.97599	2.9634	3.44602	4.12376	2.36818	2.36818	2.36818	2.36818
ENSGALG00010002526	7.88983	8.07114	7.79036	8.29917	7.41156	8.00141	8.03154	8.25732	8.06033	8.0918	7.71614	8.02836	7.11314	7.37386	7.81015
ENSGALG00010002527	7.12642	7.0701	6.54219	6.13804	4.82372	5.69434	6.67362	7.04392	7.83661	6.80678	6.2515	4.93989	4.87257	6.07238	6.30392
ENSGALG00010002528	9.02965	9.26259	9.03487	9.18507	9.50115	9.35381	9.34835	9.13386	9.02271	8.9766	9.16622	9.54997	9.99507	9.49558	9.5382
ENSGALG00010002529	2.36818	3.59031	2.36818	2.36818	3.19006	2.36818	2.36818	2.97599	2.36818	3.13898	3.54014	2.36818	2.36818	3.10226	3.78323
ENSGALG00010002530	8.55093	8.25326	8.5108	8.49094	8.07763	8.37299	8.18081	8.57139	8.24126	8.40295	8.10747	8.51033	8.4807	8.317	8.74134
ENSGALG00010002531	2.36818	2.36818	3.0266	2.36818	2.36818	2.36818	2.36818	2.36818	2.36818	2.91642	2.36818	2.36818	2.36818	2.36818	2.36818
ENSGALG00010002532	2.36818	2.36818	3.29159	3.15421	2.36818	2.36818	2.36818	2.97599	2.36818	2.36818	2.36818	2.36818	2.36818	2.36818	2.36818
ENSGALG00010002533	9.06035	9.51913	9.6404	9.68789	10.1345	10.2059	9.91124	9.05533	8.95694	9.4527	9.24705	10.321	9.65526	9.75702	9.08404
ENSGALG00010002534	2.36818	2.36818	3.0266	2.36818	2.36818	2.36818	2.36818	2.36818	2.36818	2.91642	2.36818	2.36818	2.36818	2.36818	2.36818
ENSGALG00010002535	2.36818	2.92771	2.36818	2.36818	3.19006	2.36818	3.37016	3.55874	2.36818	2.91642	3.12136	2.36818	2.36818	3.39571	3.20646
ENSGALG00010002536	8.01213	7.98865	8.12049	7.70677	7.36708	8.24116	7.73053	8.00381	8.94133	8.15429	8.11498	7.88175	6.95376	7.3857	7.40701
ENSGALG00010002537	3.56255	2.92771	3.91923	2.36818	2.36818	2.36818	3.75932	3.4062	3.20418	3.13898	4.24782	3.09206	3.67284	3.61431	3.20646
ENSGALG00010002538	2.91444	2.92771	2.36818	2.92738	2.36818	2.36818	3.08366	2.36818	2.9634	2.36818	3.42189	2.36818	2.36818	2.36818	3.88744
ENSGALG00010002539	7.28746	7.51712	7.09859	5.79182	6.23618	5.8846	5.14958	7.27833	6.53813	7.11281	7.81633	5.17529	4.87257	5.03253	5.48178
ENSGALG00010002540	3.44225	2.92771	2.36818	2.36818	2.36818	2.36818	2.36818	2.36818	2.36818	2.36818	2.36818	2.36818	2.36818	2.36818	3.66794
ENSGALG00010002541	4.15531	3.97323	4.03167	3.15421	2.36818	2.36818	3.91005	3.22162	4.2254	4.09288	3.9855	3.09206	2.36818	3.10226	2.96504
ENSGALG00010002542	3.13622	2.36818	3.0266	2.36818	2.36818	2.36818	2.36818	2.97599	2.36818	2.36818	2.90375	3.09206	2.36818	2.36818	2.36818
ENSGALG00010002543	3.8557	4.49248	4.68375	3.32518	4.40004	3.98948	3.58388	4.33372	4.55155	4.22579	3.90973	3.59763	3.54258	4.08302	2.96504
ENSGALG00010002544	8.76233	8.95033	8.54924	7.75481	8.10496	8.07296	8.23768	8.30052	7.76743	8.63702	8.33035	7.9218	8.13135	7.59397	8.1569
ENSGALG00010002545	2.36818	2.92771	2.36818	2.92738	2.36818	2.36818	2.36818	3.4062	2.9634	3.13898	2.90375	3.09206	2.36818	2.36818	3.53812
ENSGALG00010002546	10.2903	10.4711	10.3901	10.5831	10.5989	10.5874	10.4334	10.1843	10.2609	10.3248	10.4631	10.309	10.5854	10.2961	10.6304
ENSGALG00010002547	6.76762	6.43119	6.64067	6.83992	6.47913	5.98762	6.74525	6.31728	7.07592	6.76726	6.8921	6.37514	7.10368	6.64676	6.58644
ENSGALG00010002550	3.56255	2.36818	2.36818	2.36818	2.36818	2.36818	2.36818	2.97599	2.36818	3.77145	2.36818	2.36818	2.96741	2.36818	2.96504
ENSGALG00010002551	8.28592	8.47037	8.143	7.93238	7.52386	6.92532	7.79091	8.2877	8.08423	8.3405	8.28778	7.56506	7.6629	8.01567	8.24907
ENSGALG00010002553	6.49473	6.89974	6.5251	6.57985	6.30089	6.43831	6.69186	6.38332	6.5101	6.31126	6.93524	6.54937	6.51343	5.91692	7.13038
ENSGALG00010002554	5.83414	6.49569	5.44737	6.9814	8.14938	5.3238	7.57241	6.88242	5.18319	6.68481	6.4905	8.526	8.66544	9.25878	5.95148
ENSGALG00010002556	8.72705	8.26806	8.30654	6.29129	5.62577	6.11431	7.64899	8.14327	8.69362	8.84783	8.44505	6.25439	5.82891	5.77903	7.57931
ENSGALG00010002557	6.55362	8.45428	7.40867	3.97238	4.26834	4.73844	4.0431	5.61002	7.26358	6.68481	6.30524	4.48602	4.30919	4.76008	4.37086
ENSGALG00010002559	3.13622	3.46747	5.29233	3.15421	2.36818	2.36818	3.37016	4.99133	3.20418	2.36818	3.12136	4.18175	2.36818	2.36818	3.78323
ENSGALG00010002561	8.04115	8.07114	8.1148	7.83644	7.8162	8.0807	7.83255	7.10375	8.27071	7.83466	7.94836	8.02101	7.58351	7.72089	7.7453
ENSGALG00010002563	2.36818	2.36818	2.36818	2.92738	3.95331	3.12336	3.37016	2.36818	2.36818	2.91642	2.36818	3.09206	3.78851	2.36818	3.388
ENSGALG00010002565	8.14027	8.01082	8.13179	8.42322	8.32232	8.41643	8.25002	8.23966	8.33187	8.00544	8.36541	8.63118	8.15899	8.32931	7.91572
ENSGALG00010002566	13.4054	13.5483	13.4331	12.4861	12.2368	12.3792	12.5063	13.7325	13.8504	13.4502	13.7856	12.2357	11.782	12.636	12.1187
ENSGALG00010002567	6.32923	6.23342	5.83051	6.67187	7.19112	6.7806	5.78672	5.76759	6.00637	5.47367	5.96433	7.01766	6.36262	6.18558	5.84217
ENSGALG00010002568	2.36818	3.46747	2.36818	4.1933	4.12108	2.36818	3.08366	2.97599	2.36818	3.44602	3.42189	2.36818	2.36818	3.39571	2.36818
ENSGALG00010002569	6.90949	6.92802	6.65644	6.94501	5.98337	6.57641	6.79673	6.44645	7.0567	6.5515	6.93524	6.27937	6.44001	6.77854	6.84508
ENSGALG00010002570	6.91847	9.47836	7.23074	7.8659	8.73753	7.96843	7.66751	7.90647	7.97087	8.07978	9.3604	8.69727	7.72587	8.6858	7.25428
ENSGALG00010002571	8.8702	8.63068	8.4534	8.14353	8.29885	8.24116	8.07381	8.61311	8.67487	8.98951	8.66823	7.91388	8.31862	8.12562	8.24907
ENSGALG00010002572	4.01505	3.59031	3.29159	2.36818	2.36818	2.36818	3.08366	2.36818	4.06671	3.67413	4.05664	2.36818	2.96741	2.36818	2.36818
ENSGALG00010002573	9.6272	9.41163	9.74712	9.50971	9.52831	9.41931	9.1052	9.02988	9.49145	9.71221	9.55102	9.3266	8.9891	9.13807	9.14241
ENSGALG00010002574	2.36818	3.15467	3.0266	3.79776	3.95331	2.36818	3.91005	2.97599	3.38526	3.30684	2.90375	3.09206	3.39194	2.36818	2.36818
ENSGALG00010002575	6.26011	6.47024	5.16357	4.38042	3.51578	3.42463	3.91005	4.33372	7.2885	5.04035	5.46823	2.36818	2.36818	4.68241	3.66794
ENSGALG00010002576	7.66855	7.86752	7.28241	7.3093	7.39688	7.32797	7.63963	7.05406	7.15032	7.27642	7.63483	7.19826	7.75635	7.15603	7.6837
ENSGALG00010002577	8.69351	8.8358	8.80006	8.80404	8.99285	8.76255	9.01772	8.99612	9.14587	8.90118	9.05934	8.98115	9.30366	9.2684	8.97518
ENSGALG00010002578	3.8557	4.25981	2.36818	3.88844	3.75681	3.42463	3.91005	3.69057	4.14864	3.13898	3.54014	3.3817	4.56415	4.08302	2.36818
ENSGALG00010002579	5.48988	5.89283	5.83051	4.68853	4.51944	5.84854	4.85012	5.81644	6.08471	6.98953	6.99353	5.00263	4.30919	3.79355	4.99544
ENSGALG00010002580	3.8557	3.46747	3.49004	2.36818	2.36818	2.36818	2.36818	2.97599	3.97873	3.44602	2.90375	2.36818	2.36818	3.10226	2.36818
ENSGALG00010002581	10.1622	10.1828	10.4215	10.2282	10.3207	10.4115	10.1717	10.0299	10.3404	10.2596	10.0503	10.2785	10.343	10.2467	10.1702
ENSGALG00010002582	4.08723	4.93965	3.49004	4.77709	3.51578	4.36529	4.70903	4.26041	4.71401	4.97078	4.77312	3.92692	4.37784	4.51193	4.95316
ENSGALG00010002584	6.11095	6.33572	3.29159	2.92738	3.19006	3.42463	3.91005	4.26041	7.43702	3.67413	5.70814	3.3817	4.15947	3.61431	3.66794
ENSGALG00010002585	8.73468	8.30441	8.69731	7.29493	7.4688	7.08787	8.06685	8.37518	8.77221	8.21052	7.67097	6.94168	6.88912	6.60677	7.2795
ENSGALG00010002586	8.21857	8.44128	8.12615	7.12653	6.84671	7.26141	7.17922	8.78114	9.27188	8.49637	8.75971	7.00279	6.9218	7.45478	7.31245
ENSGALG00010002587	10.4151	10.2891	10.1611	10.0536	10.2992	9.63949	10.0866	10.3822	10.2151	10.3231	10.357	9.74334	10.5042	10.1988	10.3972
ENSGALG00010002588	8.4981	8.42816	8.40298	7.87558	7.62804	7.71367	7.92781	8.32584	8.53624	8.13118	8.32388	7.83217	7.94811	8.10429	7.79858
ENSGALG00010002589	9.76772	8.82333	9.66782	8.28107	8.22605	8.00953	8.33935	9.58893	9.4644	8.91026	9.64609	8.28326	8.40578	7.88834	8.10146
ENSGALG00010002590	6.4582	6.98296	6.03831	9.85015	6.75752	8.51105	8.50809	5.58196	6.63214	5.86196	6.52485	7.17191	7.4331	8.28576	8.80923
ENSGALG00010002591	6.36916	5.9494	5.55334	6.48151	6.1684	6.25833	6.49803	5.9966	5.92346	5.78441	6.36969	5.67098	5.49098	6.29047	6.45952
ENSGALG00010002592	9.45465	9.69779	9.02884	8.95096	9.21389	9.29519	9.53384	9.82913	8.84952	9.3613	9.38079	9.22466	9.55484	9.12754	9.2182
ENSGALG00010002595	2.36818	2.36818	2.36818	2.36818	2.36818	2.36818	2.36818	2.97599	2.36818	2.36818	2.36818	2.36818	2.36818	2.36818	2.36818
ENSGALG00010002596	6.06298	6.60494	6.90109	3.69886	3.95331	3.64872	3.08366	5.74251	5.18319	7.70495	4.84966	2.36818	4.23658	3.10226	4.43584
ENSGALG00010002597	7.97394	8.14917	7.83946	8.80404	8.9633	8.97249	8.63111	7.90647	7.87548	8.19945	8.13729	8.98494	8.86037	8.55568	8.49117
ENSGALG00010002598	9.89689	9.42819	9.40455	9.62183	9.95343	9.47025	9.77488	9.32799	9.16616	9.35467	9.68824	9.70714	10.2971	9.74558	9.97847
ENSGALG00010002599	8.25441	8.47993	9.78697	9.03761	9.22223	9.73078	9.60039	9.69634	8.05066	9.3312	9.77612	9.90186	8.87988	9.53861	8.90946
ENSGALG00010002600	3.13622	2.36818	3.29159	3.46686	2.36818	4.56511	3.08366	2.36818	2.36818	3.30684	2.36818	4.39248	3.54258	3.61431	2.36818
ENSGALG00010002601	7.99528	8.33986	6.80534	7.30213	9.05487	8.47041	7.71281	7.41839	6.99745	8.07978	6.98535	9.32362	8.85193	9.02913	7.37617
ENSGALG00010002603	5.27996	4.73469	5.29233	5.74994	5.62577	5.69434	5.43993	6.30029	3.97873	4.22579	4.41345	5.46705	5.00381	5.20631	5.45214
ENSGALG00010002604	4.15531	5.08394	5.91203	4.12408	4.82372	5.15493	5.09469	5.69099	4.60795	4.16114	4.95692	4.73215	2.96741	4.68241	3.88744
ENSGALG00010002605	5.92656	5.72992	5.11785	4.32109	4.82372	4.73844	5.3497	5.49426	5.32065	4.77952	5.20762	3.77479	3.39194	5.31113	7.45943
ENSGALG00010002606	5.4653	5.38995	5.96389	5.77103	5.14539	6.11431	5.85346	5.15453	5.96552	5.25941	5.08797	5.81526	5.60383	6.34016	5.95148
ENSGALG00010002608	7.80535	7.55384	7.33229	8.17916	8.0309	8.10366	8.19364	7.36235	7.83097	7.87234	8.08851	7.96077	8.52384	8.26028	8.24482
ENSGALG00010002609	11.1496	11.3464	11.3125	11.6127	11.8073	11.5716	11.8599	11.3005	11.3966	11.3696	12.0734	11.6509	11.856	11.5195	11.7057
ENSGALG00010002611	3.30352	3.15467	3.0266	4.12408	3.51578	3.98948	3.58388	4.01002	4.06671	3.67413	4.46419	4.29153	3.78851	4.20483	3.78323
ENSGALG00010002612	5.69372	5.96777	6.01393	5.14952	4.91152	4.2523	5.43993	6.82429	5.61474	6.25511	6.4905	5.59291	5.33584	6.29047	5.7723
ENSGALG00010002613	8.77965	8.91551	8.50646	8.91854	9.01702	9.23409	8.81674	8.96692	8.73647	8.49032	9.01386	8.85448	9.34835	8.92757	9.01071
ENSGALG00010002614	8.87711	8.38469	9.00138	8.96463	9.57789	9.48197	8.25615	8.45765	8.4321	8.5727	9.16983	9.80243	8.28557	8.69058	7.97863
ENSGALG00010002615	3.13622	2.36818	2.36818	2.36818	2.36818	2.36818	2.36818	2.36818	2.36818	2.91642	2.36818	2.36818	2.36818	2.36818	2.36818
ENSGALG00010002616	7.30808	7.39426	8.42152	7.11019	8.13178	8.0495	7.67669	8.15744	8.01629	7.17448	7.55972	8.17476	7.28199	8.52391	6.9846
ENSGALG00010002617	2.36818	2.36818	2.36818	2.36818	2.36818	2.36818	2.36818	2.36818	2.9634	2.36818	3.12136	2.36818	2.36818	2.36818	2.36818
ENSGALG00010002618	6.28816	6.2028	5.9382	8.80404	5.52022	8.24804	7.33806	6.19383	6.00637	5.61529	4.36061	5.55219	4.91773	5.98115	8.74738
ENSGALG00010002619	9.85899	9.53604	10.1775	9.72049	9.70235	9.75273	9.79186	9.7963	10.1723	9.80762	9.84887	9.63431	9.65202	9.68224	9.74675
ENSGALG00010002620	2.36818	2.92771	2.36818	2.36818	3.19006	2.36818	2.36818	2.36818	2.36818	2.36818	2.36818	3.09206	2.36818	2.36818	2.36818
ENSGALG00010002621	7.78098	7.39426	7.55026	8.63189	8.62878	8.38553	9.11535	7.62296	7.88639	7.44849	7.76948	9.0369	8.77068	8.70482	8.77421
ENSGALG00010002622	9.9205	9.77751	9.82576	9.8477	10.1801	10.0938	10.0215	10.0013	9.70063	9.74429	9.60402	10.0246	9.98995	9.65072	9.91023
ENSGALG00010002623	10.2615	10.2223	10.775	11.4448	11.1866	11.8434	10.8739	10.8438	10.0295	10.5426	10.0116	11.1995	10.9903	11.167	10.9685
ENSGALG00010002624	3.30352	3.32572	3.0266	3.79776	2.36818	3.98948	3.91005	3.80759	3.38526	2.91642	3.12136	3.3817	3.67284	3.61431	4.15308
ENSGALG00010002625	8.10537	8.2383	8.13179	7.09367	7.13914	7.32797	7.54261	8.36707	8.95435	8.28921	8.53738	7.00279	6.56958	7.62427	7.2795
ENSGALG00010002626	9.62035	9.34689	9.46834	9.59277	10.5131	9.96398	9.94007	9.20834	9.0545	9.10275	9.30402	10.6054	10.9658	10.0837	9.84
ENSGALG00010002627	9.09633	9.04787	8.97024	9.49565	9.57464	9.53922	9.44542	8.95074	9.39542	9.20406	9.58251	9.47121	9.82296	9.34615	9.21602
ENSGALG00010002628	10.0927	10.1169	10.3239	10.3564	10.4542	10.4493	10.1488	10.0728	10.4802	10.3332	9.92454	10.6808	10.5632	10.3827	10.4039
ENSGALG00010002629	4.01505	4.97717	4.61815	2.36818	3.19006	3.12336	2.36818	4.33372	4.60795	3.94339	3.74093	2.36818	2.36818	3.94737	2.96504
ENSGALG00010002630	2.36818	2.36818	3.0266	2.36818	2.36818	2.36818	3.08366	2.36818	2.36818	2.36818	2.36818	2.36818	2.36818	2.36818	2.36818
ENSGALG00010002631	2.36818	3.15467	2.36818	2.92738	2.36818	2.36818	2.36818	2.36818	3.53501	2.36818	2.36818	3.77479	2.36818	4.20483	2.36818
ENSGALG00010002632	8.80886	8.96629	8.15413	7.35852	8.29885	3.42463	6.0651	7.74063	7.92925	8.10768	7.90134	4.57328	3.20974	3.39571	5.15261
ENSGALG00010002633	6.85441	6.80126	6.94024	6.44282	6.86817	6.68213	6.57873	6.64777	6.06552	6.50417	6.80173	6.97256	6.75041	6.8826	6.33642
ENSGALG00010002634	6.62124	6.50824	6.32226	9.44289	9.16713	10.0629	8.16786	6.38332	6.37669	6.33854	6.13754	8.94664	8.37862	8.97141	9.21602
ENSGALG00010002635	6.51858	6.37742	6.10902	6.64941	7.65295	8.02565	7.25472	5.90937	5.83542	5.8992	5.91319	7.51356	6.93253	7.79378	6.9846
ENSGALG00010002636	2.36818	2.92771	2.36818	2.36818	2.36818	2.36818	3.08366	2.97599	2.36818	2.36818	3.28561	2.36818	3.54258	3.39571	3.53812
ENSGALG00010002637	2.36818	2.36818	2.36818	2.36818	3.19006	2.36818	3.08366	2.36818	2.36818	2.91642	2.36818	2.36818	3.20974	3.10226	2.96504
ENSGALG00010002638	5.53779	4.77825	4.80599	3.69886	3.51578	4.46906	2.36818	5.07535	6.49588	4.60415	4.81193	4.06115	4.44297	4.76008	2.36818
ENSGALG00010002639	4.68767	5.15078	5.11785	5.14952	3.95331	5.56655	5.03752	4.18253	4.76403	5.72334	4.77312	3.3817	5.12356	4.68241	5.42186
ENSGALG00010002640	4.8127	4.90107	4.91805	5.74994	3.95331	5.26976	5.64299	4.33372	3.53501	5.56965	5.23599	5.46705	5.12356	4.68241	4.15308
ENSGALG00010002641	2.36818	2.36818	2.36818	3.15421	2.36818	2.36818	2.36818	2.36818	2.36818	2.36818	2.36818	2.36818	2.36818	2.36818	2.96504
ENSGALG00010002643	3.76668	2.92771	3.0266	2.36818	3.19006	2.36818	2.36818	2.36818	3.66453	3.94339	2.36818	3.09206	4.72724	2.36818	2.36818
ENSGALG00010002644	7.05497	5.41715	7.29253	3.46686	2.36818	3.98948	3.37016	5.9966	6.90374	6.37849	6.30524	4.06115	3.67284	3.39571	3.20646
ENSGALG00010002646	9.36571	9.64066	9.37869	9.66574	9.75504	9.8487	9.61954	9.40918	9.33298	9.08682	9.08059	9.67236	9.39557	9.75245	9.46323
ENSGALG00010002647	9.22832	8.97984	9.22362	9.07591	8.44143	8.12626	8.84141	9.31752	8.98513	9.14567	9.21246	8.5208	8.70034	8.68101	9.45035
ENSGALG00010002649	9.17135	9.24773	9.04088	8.81162	8.59706	8.57815	8.96256	9.10734	9.22966	9.17045	9.09585	8.65514	8.96321	8.92352	9.10062
ENSGALG00010002651	2.36818	3.15467	2.36818	2.36818	2.36818	2.36818	2.36818	2.36818	3.20418	3.13898	4.12376	3.09206	2.36818	2.36818	2.36818
ENSGALG00010002652	2.36818	3.15467	3.29159	2.36818	2.36818	3.12336	3.08366	2.97599	3.38526	2.36818	2.90375	2.36818	2.36818	2.36818	2.96504
ENSGALG00010002653	10.9066	10.6688	10.9519	11.6058	12.1564	12.1032	11.987	10.8113	10.8246	10.5665	10.8571	11.8378	12.132	11.8784	11.8434
ENSGALG00010002655	14.079	12.3914	13.5511	6.70491	12.3713	8.91741	7.32644	12.7793	14.474	12.6179	12.8517	11.6592	10.9677	7.72089	7.49573
ENSGALG00010002657	5.4653	4.73469	4.68375	2.92738	3.51578	2.36818	2.36818	3.80759	3.97873	4.02051	4.12376	2.36818	2.36818	2.36818	2.36818
ENSGALG00010002658	8.91118	8.95033	9.04686	9.55561	9.69937	9.5336	9.42652	9.18778	8.93083	9.14759	9.00782	9.60264	9.05431	9.45404	9.28606
ENSGALG00010002659	2.91444	2.36818	2.36818	2.92738	3.19006	3.12336	2.36818	2.36818	2.9634	2.36818	2.90375	3.09206	2.36818	2.36818	2.96504
ENSGALG00010002661	6.93625	6.05622	5.9382	6.86935	6.84671	6.7806	6.57873	5.61002	6.17695	6.4799	6.7053	6.84487	6.67568	6.8826	6.75196
ENSGALG00010002662	3.30352	2.92771	2.36818	2.36818	2.36818	2.36818	2.36818	3.9133	3.53501	3.30684	2.36818	3.09206	3.20974	2.36818	2.96504
ENSGALG00010002663	4.59728	3.46747	3.91923	5.72853	4.26834	5.47442	5.20238	4.09937	4.81225	4.40176	3.9855	5.06262	5.57645	5.31113	5.11497
ENSGALG00010002664	6.55362	6.6734	6.57577	6.26192	6.13327	5.73449	6.39031	5.81644	6.96689	6.52803	6.53611	6.17673	6.61029	6.38819	6.45952
ENSGALG00010002665	2.36818	3.15467	3.0266	2.36818	3.51578	3.12336	2.36818	2.36818	3.38526	3.13898	2.36818	2.36818	2.96741	2.36818	3.78323
ENSGALG00010002666	8.18924	7.1362	7.55866	7.89477	7.42608	7.40397	7.61121	7.99331	7.3994	7.79598	7.9229	8.31968	8.37076	8.89482	7.77514
ENSGALG00010002667	2.36818	2.36818	2.36818	2.36818	2.36818	2.36818	2.36818	2.36818	2.36818	2.36818	2.36818	2.36818	2.36818	3.61431	2.36818
ENSGALG00010002668	3.8557	5.41715	4.39904	3.97238	3.95331	3.12336	3.75932	4.46873	4.29767	4.09288	5.70814	3.09206	2.96741	4.08302	3.98283
ENSGALG00010002669	4.59728	3.97323	3.65355	2.36818	2.36818	2.36818	4.0431	5.11551	3.97873	4.82	5.58236	3.09206	3.54258	2.36818	2.36818
ENSGALG00010002670	3.56255	2.36818	2.36818	2.36818	2.36818	3.83221	2.36818	2.36818	2.36818	2.36818	2.90375	2.36818	2.36818	2.36818	2.36818
ENSGALG00010002671	7.94352	7.42762	8.87258	4.73355	5.07177	3.83221	6.36775	8.19456	6.90374	6.92818	7.80243	5.32878	5.6829	5.31113	5.45214
ENSGALG00010002673	9.03172	9.17893	8.33616	9.36254	10.6101	10.295	9.55637	8.6866	9.2382	9.26373	9.46695	10.7403	10.7267	10.8808	9.89265
ENSGALG00010002675	2.36818	3.32572	2.36818	2.36818	2.36818	2.36818	2.36818	2.36818	2.36818	2.91642	2.36818	2.36818	2.36818	2.36818	3.53812
ENSGALG00010002676	3.30352	3.15467	3.0266	3.88844	4.40004	4.6546	4.78143	2.36818	3.20418	2.91642	2.36818	5.3764	4.67508	4.90312	4.95316
ENSGALG00010002677	2.91444	4.38145	3.65355	2.92738	2.36818	2.36818	4.37175	3.55874	3.38526	2.91642	2.90375	3.92692	2.36818	2.36818	2.96504
ENSGALG00010002678	12.2382	11.7752	12.4462	11.1879	11.0243	11.1352	11.218	12.168	12.333	12.2554	11.9972	11.2585	11.1457	11.3058	11.133
ENSGALG00010002679	4.89003	2.36818	3.65355	3.97238	2.36818	2.36818	3.91005	4.09937	3.97873	3.67413	5.29104	3.77479	4.23658	3.10226	2.96504
ENSGALG00010002680	3.8557	3.59031	4.13432	3.58963	2.36818	3.42463	2.36818	2.97599	3.97873	3.44602	4.60553	3.09206	2.96741	3.10226	3.20646
ENSGALG00010002681	9.00252	8.81076	9.37156	7.82148	7.4688	7.00889	7.74804	9.0092	9.2382	9.3613	8.47162	8.22683	7.96908	7.99263	7.56571
ENSGALG00010002682	9.27268	9.07126	9.25755	9.902	10.1629	10.1185	9.78552	9.18317	9.39159	9.06869	9.33168	10.3623	9.82584	9.8432	9.76023
ENSGALG00010002685	7.23815	6.86116	6.59227	4.64195	5.57398	4.2523	4.63249	7.0337	6.22956	6.71628	6.30524	5.27947	5.30264	5.62626	4.99544
ENSGALG00010002688	3.30352	3.46747	3.29159	2.36818	2.36818	2.36818	2.36818	3.4062	3.66453	3.44602	3.64546	2.36818	3.54258	2.36818	2.36818
ENSGALG00010002689	8.87481	8.91551	8.86244	8.6461	8.80016	8.75773	8.93989	9.04011	8.95176	8.68543	9.00176	8.47309	8.7252	8.37752	9.07687
ENSGALG00010002693	4.28108	5.18303	5.02159	2.36818	2.36818	2.36818	2.36818	4.90181	4.71401	4.65021	5.41985	3.09206	2.36818	2.36818	2.36818
ENSGALG00010002694	2.36818	3.15467	2.36818	2.36818	2.36818	2.36818	2.36818	2.36818	2.36818	2.36818	2.36818	2.36818	2.36818	2.36818	2.36818
ENSGALG00010002695	2.36818	2.36818	2.36818	2.36818	2.36818	2.36818	2.36818	2.36818	2.36818	3.13898	2.36818	2.36818	2.36818	2.36818	2.36818
ENSGALG00010002696	2.36818	2.36818	2.36818	3.15421	3.19006	2.36818	3.08366	2.97599	2.9634	2.36818	2.36818	2.36818	3.54258	2.36818	3.388
ENSGALG00010002699	2.36818	2.36818	2.36818	2.36818	3.51578	2.36818	3.37016	2.36818	2.36818	2.36818	2.36818	2.36818	3.39194	3.61431	2.36818
ENSGALG00010002700	9.74774	9.63639	9.60637	9.68376	9.47695	9.3916	9.53888	9.85254	9.19497	9.89711	9.19839	9.55507	9.13072	9.78185	9.66627
ENSGALG00010002701	3.13622	3.59031	2.36818	3.79776	2.36818	3.64872	4.0431	3.55874	3.20418	3.86072	4.69196	3.59763	2.96741	2.36818	2.36818
ENSGALG00010002702	5.83414	5.68609	6.1543	4.89987	4.91152	4.46906	5.03752	5.66451	6.34528	6.29743	5.842	4.39248	4.72724	4.59993	4.76954
ENSGALG00010002703	8.54226	8.10038	8.15413	8.42652	9.33034	8.96415	8.57337	8.43844	8.37125	8.19574	8.27442	8.88316	8.68458	8.64208	8.61839
ENSGALG00010002704	5.33547	5.61768	5.88537	4.64195	3.51578	3.83221	4.63249	5.63753	5.44577	5.4231	5.68794	5.17529	3.39194	4.41755	4.15308
ENSGALG00010002705	9.59821	9.35558	9.35237	9.74447	9.75504	9.57525	9.92861	9.36306	9.2467	9.23872	9.29247	9.43847	10.0576	9.7271	10.3275
ENSGALG00010002706	10.4541	10.1352	10.3177	8.77328	8.91266	8.95996	8.91299	10.3227	9.9433	9.97922	10.0246	8.66461	9.46915	8.93966	8.86854
ENSGALG00010002707	2.91444	3.32572	3.65355	6.18576	4.51944	4.12801	6.00777	3.9133	3.53501	3.44602	4.05664	5.22836	4.62078	5.58534	5.39091
ENSGALG00010002708	5.99641	5.91194	6.36134	5.8123	4.82372	5.37583	5.43993	5.61002	6.78023	6.13571	6.63372	4.39248	5.33584	5.15078	4.99544
ENSGALG00010002710	2.91444	2.36818	2.36818	2.36818	2.36818	2.36818	2.36818	2.36818	2.36818	2.36818	2.90375	2.36818	2.96741	2.36818	2.36818
ENSGALG00010002711	4.08723	3.15467	4.13432	2.36818	4.26834	3.12336	3.08366	2.36818	3.97873	3.67413	3.74093	4.29153	4.37784	4.08302	2.36818
ENSGALG00010002712	6.7067	7.04451	6.79113	5.61631	4.12108	6.3121	6.14698	7.35417	7.38407	6.95479	7.32063	5.1201	5.57645	5.84965	5.97237
ENSGALG00010002713	7.95664	7.42762	7.80456	8.41991	7.92243	8.38553	8.24387	7.95596	8.20248	7.99267	7.34001	7.98365	8.00506	8.03834	8.0825
ENSGALG00010002714	5.4653	5.81371	6.08584	6.77918	8.0868	7.73343	6.57873	5.61002	6.06552	6.05567	6.6126	6.98775	8.56917	8.48593	7.12111
ENSGALG00010002716	7.99952	8.53909	7.63217	9.11527	9.26322	9.41013	9.35978	8.38725	7.90261	8.42846	8.52616	9.21503	8.78257	9.04414	9.66786
ENSGALG00010002719	2.36818	2.36818	2.36818	3.46686	2.36818	2.36818	2.36818	2.36818	2.36818	2.36818	3.12136	2.36818	2.36818	2.36818	2.36818
ENSGALG00010002722	4.54966	5.11777	4.22895	4.1933	4.26834	3.83221	3.75932	4.26041	5.44577	4.89748	5.26378	4.39248	4.37784	4.51193	4.37086
ENSGALG00010002725	8.46177	8.33284	8.18159	7.19781	5.9433	7.7817	6.83005	8.03996	8.47611	7.86301	7.72107	5.67098	6.48451	7.01058	7.53813
ENSGALG00010002726	2.36818	2.36818	2.36818	2.36818	2.36818	2.36818	3.08366	3.4062	2.36818	3.13898	3.28561	2.36818	2.36818	2.36818	2.36818
ENSGALG00010002727	2.36818	2.92771	2.36818	2.36818	2.36818	3.12336	2.36818	2.36818	2.36818	2.36818	2.36818	2.36818	2.36818	3.10226	2.36818
ENSGALG00010002728	9.33759	9.76061	9.39754	9.37966	8.62878	8.73341	9.24736	9.84526	9.08797	9.40853	10.1051	8.64081	8.33487	8.56612	9.00317
ENSGALG00010002729	2.36818	2.92771	2.36818	3.79776	3.51578	4.56511	4.91549	2.36818	2.36818	3.13898	2.36818	3.3817	3.98872	3.79355	4.22999
ENSGALG00010002730	8.6019	8.65058	8.60707	8.27742	8.33006	8.2203	8.86165	8.71881	8.72131	8.48729	8.39038	8.26469	8.33082	8.14664	8.12945
ENSGALG00010002732	2.36818	2.36818	2.36818	3.97238	4.40004	3.42463	3.58388	3.4062	3.53501	2.91642	2.36818	3.3817	4.15947	3.39571	4.49769
ENSGALG00010002733	4.39535	4.54462	5.83051	5.46869	4.26834	4.46906	4.0431	4.33372	4.85881	4.45539	3.90973	5.17529	4.30919	3.94737	4.55673
ENSGALG00010002735	2.36818	3.15467	2.36818	2.36818	2.36818	2.36818	2.36818	2.36818	3.20418	2.36818	2.36818	2.36818	2.36818	2.36818	2.36818
ENSGALG00010002737	3.13622	2.36818	2.36818	2.92738	2.36818	2.36818	2.36818	2.97599	2.36818	2.36818	2.36818	2.36818	2.36818	2.36818	2.96504
ENSGALG00010002739	2.36818	4.86135	3.0266	2.36818	2.36818	2.36818	2.36818	2.97599	3.77956	2.91642	3.28561	2.36818	2.36818	2.36818	2.36818
ENSGALG00010002740	2.91444	2.92771	2.36818	2.36818	3.95331	3.12336	3.08366	2.36818	2.36818	2.36818	2.36818	3.59763	3.39194	4.20483	3.66794
ENSGALG00010002741	10.869	9.68957	9.52942	5.36088	6.61239	6.38916	4.91549	7.29553	8.98259	9.14182	9.32197	6.27937	5.85185	5.36072	5.45214
ENSGALG00010002742	8.58792	8.50201	8.65093	8.91385	8.86018	8.84206	8.78318	8.44616	8.62361	8.67214	8.56232	8.68801	9.25755	8.6568	9.11001
ENSGALG00010002743	6.36916	6.49569	6.21962	5.85241	6.06029	5.91978	6.24933	7.62976	6.26359	6.37849	6.33137	4.93989	5.19799	5.5432	6.25373
ENSGALG00010002744	3.13622	4.32209	4.31686	3.15421	4.62881	4.46906	2.36818	3.22162	4.06671	4.02051	3.74093	3.3817	4.87257	4.41755	3.88744
ENSGALG00010002747	5.30799	3.97323	5.25072	3.15421	2.36818	2.36818	3.58388	4.99133	4.98961	4.02051	4.64945	3.92692	3.20974	3.39571	3.78323
ENSGALG00010002750	8.01213	9.31518	8.70868	9.78099	8.46271	8.38553	9.76417	10.0131	9.69909	9.40692	10.6472	9.6319	10.9415	10.2976	10.2403
ENSGALG00010002752	10.7232	10.3982	10.6636	11.0626	11.4174	11.4297	11.2787	10.595	10.9245	10.446	10.4944	11.3892	11.0107	11.3105	11.0372
ENSGALG00010002753	7.11866	7.16814	7.39934	7.11019	6.71075	6.68213	7.27902	7.05406	7.42209	7.33834	7.34641	6.50776	7.08457	7.39745	7.42971
ENSGALG00010002754	2.36818	2.36818	3.29159	2.36818	2.36818	2.36818	2.36818	3.22162	3.77956	2.36818	2.36818	2.36818	2.36818	2.36818	2.96504
ENSGALG00010002756	6.2315	4.59476	4.61815	4.38042	4.12108	5.21353	4.78143	4.01002	4.66204	4.40176	4.51303	3.59763	4.23658	4.20483	5.95148
ENSGALG00010002758	4.54966	3.88926	4.39904	4.05065	3.51578	4.6546	3.58388	4.01002	3.53501	3.94339	4.05664	3.09206	3.39194	4.20483	2.96504
ENSGALG00010002760	11.3409	11.4457	11.3833	11.2009	11.6275	11.5893	11.3276	11.3877	11.4773	11.3236	11.4314	11.5914	11.7068	11.4065	11.2822
ENSGALG00010002761	2.36818	2.36818	2.36818	3.46686	2.36818	2.36818	2.36818	2.36818	2.9634	2.36818	2.36818	2.36818	2.36818	3.10226	2.36818
ENSGALG00010002762	8.18553	7.60722	8.35557	8.81414	9.38337	8.8375	8.21897	8.19914	8.82704	8.15047	8.21274	9.3086	9.09064	8.80074	8.50903
ENSGALG00010002763	11.408	11.1925	11.6668	11.6091	12.0075	11.817	11.7095	11.644	11.7888	11.531	11.5273	12.1515	12.2952	11.9207	11.6432
ENSGALG00010002764	2.36818	2.36818	2.36818	3.32518	3.19006	2.36818	3.08366	2.36818	2.36818	2.36818	2.36818	2.36818	2.36818	2.36818	2.36818
ENSGALG00010002765	10.7906	11.0262	10.9967	9.50971	9.83335	10.2322	10.1037	10.2275	10.3708	10.5397	10.061	10.1326	9.56003	10.1752	9.32489
[truncated: 22,561 more rows]

## Sheet: Table S7
Table S7. Gene list of the red module.
Gene ID	moduleColor
ENSGALG00010000055	red
ENSGALG00010000180	red
ENSGALG00010000419	red
ENSGALG00010000484	red
ENSGALG00010000654	red
ENSGALG00010000693	red
ENSGALG00010000728	red
ENSGALG00010000859	red
ENSGALG00010001237	red
ENSGALG00010001367	red
ENSGALG00010001378	red
ENSGALG00010001457	red
ENSGALG00010001597	red
ENSGALG00010001691	red
ENSGALG00010001783	red
ENSGALG00010002206	red
ENSGALG00010002336	red
ENSGALG00010002437	red
ENSGALG00010002468	red
ENSGALG00010002481	red
ENSGALG00010002636	red
ENSGALG00010002750	red
ENSGALG00010002814	red
ENSGALG00010003239	red
ENSGALG00010003702	red
ENSGALG00010003797	red
ENSGALG00010003860	red
ENSGALG00010004007	red
ENSGALG00010004236	red
ENSGALG00010004782	red
ENSGALG00010004837	red
ENSGALG00010004934	red
ENSGALG00010004948	red
ENSGALG00010004987	red
ENSGALG00010004988	red
ENSGALG00010005217	red
ENSGALG00010005326	red
ENSGALG00010005389	red
ENSGALG00010005471	red
ENSGALG00010005844	red
ENSGALG00010006266	red
ENSGALG00010006345	red
ENSGALG00010006406	red
ENSGALG00010006457	red
ENSGALG00010006842	red
ENSGALG00010007011	red
ENSGALG00010007038	red
ENSGALG00010007085	red
ENSGALG00010007091	red
ENSGALG00010007416	red
ENSGALG00010007859	red
ENSGALG00010007879	red
ENSGALG00010007887	red
ENSGALG00010007916	red
ENSGALG00010007995	red
ENSGALG00010008101	red
ENSGALG00010008169	red
ENSGALG00010008212	red
ENSGALG00010008226	red
ENSGALG00010008261	red
ENSGALG00010009078	red
ENSGALG00010009115	red
ENSGALG00010009139	red
ENSGALG00010009292	red
ENSGALG00010009409	red
ENSGALG00010009499	red
ENSGALG00010009588	red
ENSGALG00010009597	red
ENSGALG00010009732	red
ENSGALG00010010243	red
ENSGALG00010010358	red
ENSGALG00010010605	red
ENSGALG00010010648	red
ENSGALG00010010709	red
ENSGALG00010010766	red
ENSGALG00010010809	red
ENSGALG00010010828	red
ENSGALG00010010859	red
ENSGALG00010010906	red
ENSGALG00010010974	red
ENSGALG00010011079	red
ENSGALG00010011121	red
ENSGALG00010011155	red
ENSGALG00010011197	red
ENSGALG00010011204	red
ENSGALG00010011316	red
ENSGALG00010011445	red
ENSGALG00010011923	red
ENSGALG00010012058	red
ENSGALG00010012082	red
ENSGALG00010012093	red
ENSGALG00010012178	red
ENSGALG00010012196	red
ENSGALG00010012242	red
ENSGALG00010012334	red
ENSGALG00010012497	red
ENSGALG00010012511	red
ENSGALG00010012715	red
ENSGALG00010012996	red
ENSGALG00010013082	red
ENSGALG00010013168	red
ENSGALG00010013468	red
ENSGALG00010013517	red
ENSGALG00010013525	red
ENSGALG00010013836	red
ENSGALG00010013879	red
ENSGALG00010014099	red
ENSGALG00010014244	red
ENSGALG00010014294	red
ENSGALG00010014398	red
ENSGALG00010014627	red
ENSGALG00010014648	red
ENSGALG00010014809	red
ENSGALG00010014871	red
ENSGALG00010015126	red
ENSGALG00010015214	red
ENSGALG00010015675	red
ENSGALG00010015892	red
ENSGALG00010015898	red
ENSGALG00010015968	red
ENSGALG00010016129	red
ENSGALG00010016212	red
ENSGALG00010016372	red
ENSGALG00010016378	red
ENSGALG00010016393	red
ENSGALG00010016493	red
ENSGALG00010016498	red
ENSGALG00010016678	red
ENSGALG00010016857	red
ENSGALG00010016952	red
ENSGALG00010016956	red
ENSGALG00010016984	red
ENSGALG00010017014	red
ENSGALG00010017017	red
ENSGALG00010017235	red
ENSGALG00010017383	red
ENSGALG00010017496	red
ENSGALG00010017752	red
ENSGALG00010017967	red
ENSGALG00010017987	red
ENSGALG00010018009	red
ENSGALG00010018175	red
ENSGALG00010018177	red
ENSGALG00010018218	red
ENSGALG00010018287	red
ENSGALG00010018416	red
ENSGALG00010018517	red
ENSGALG00010018559	red
ENSGALG00010018564	red
ENSGALG00010018655	red
ENSGALG00010018780	red
ENSGALG00010018865	red
ENSGALG00010019403	red
ENSGALG00010019477	red
ENSGALG00010019675	red
ENSGALG00010019736	red
ENSGALG00010019843	red
ENSGALG00010019989	red
ENSGALG00010020101	red
ENSGALG00010020370	red
ENSGALG00010020374	red
ENSGALG00010020586	red
ENSGALG00010020623	red
ENSGALG00010020733	red
ENSGALG00010020929	red
ENSGALG00010020981	red
ENSGALG00010021036	red
ENSGALG00010021136	red
ENSGALG00010021439	red
ENSGALG00010021444	red
ENSGALG00010021483	red
ENSGALG00010021583	red
ENSGALG00010021748	red
ENSGALG00010021794	red
ENSGALG00010021841	red
ENSGALG00010021844	red
ENSGALG00010021878	red
ENSGALG00010021953	red
ENSGALG00010021989	red
ENSGALG00010022022	red
ENSGALG00010022092	red
ENSGALG00010022162	red
ENSGALG00010022347	red
ENSGALG00010022445	red
ENSGALG00010022480	red
ENSGALG00010022489	red
ENSGALG00010022537	red
ENSGALG00010022597	red
ENSGALG00010023017	red
ENSGALG00010023065	red
ENSGALG00010023110	red
ENSGALG00010023134	red
ENSGALG00010023147	red
ENSGALG00010023150	red
ENSGALG00010023237	red
ENSGALG00010023257	red
ENSGALG00010023264	red
ENSGALG00010023359	red
ENSGALG00010023526	red
ENSGALG00010023546	red
ENSGALG00010023572	red
ENSGALG00010023828	red
ENSGALG00010023854	red
ENSGALG00010023955	red
ENSGALG00010024082	red
ENSGALG00010024231	red
ENSGALG00010024293	red
ENSGALG00010024333	red
ENSGALG00010024357	red
ENSGALG00010024480	red
ENSGALG00010024563	red
ENSGALG00010024676	red
ENSGALG00010024678	red
ENSGALG00010024709	red
ENSGALG00010024722	red
ENSGALG00010024729	red
ENSGALG00010024871	red
ENSGALG00010024943	red
ENSGALG00010024953	red
ENSGALG00010025019	red
ENSGALG00010025080	red
ENSGALG00010025226	red
ENSGALG00010025248	red
ENSGALG00010025272	red
ENSGALG00010025344	red
ENSGALG00010025358	red
ENSGALG00010025380	red
ENSGALG00010025527	red
ENSGALG00010025673	red
ENSGALG00010025770	red
ENSGALG00010026153	red
ENSGALG00010026469	red
ENSGALG00010026866	red
ENSGALG00010026887	red
ENSGALG00010026940	red
ENSGALG00010027714	red
ENSGALG00010027720	red
ENSGALG00010027825	red
ENSGALG00010027922	red
ENSGALG00010027926	red
ENSGALG00010028155	red
ENSGALG00010028180	red
ENSGALG00010028255	red
ENSGALG00010028295	red
ENSGALG00010028456	red
ENSGALG00010028528	red
ENSGALG00010028591	red
ENSGALG00010028615	red
ENSGALG00010028705	red
ENSGALG00010029023	red
ENSGALG00010029249	red
ENSGALG00010029317	red
ENSGALG00010029568	red
ENSGALG00010029654	red
ENSGALG00010029736	red
ENSGALG00010029776	red
ENSGALG00010029881	red

## Sheet: Table S8
Table S8. List of hub genes indicated in the manuscript with red module.
Gene ID	MM	GS
ENSGALG00010000055	0.952733	0.690979
ENSGALG00010000859	0.971679	0.70678
ENSGALG00010001237	0.953921	0.735387
ENSGALG00010001457	0.953832	0.669522
ENSGALG00010001597	0.809652	0.4426
ENSGALG00010001783	0.866648	0.552166
ENSGALG00010002437	0.916617	0.686076
ENSGALG00010002481	0.923581	0.535903
ENSGALG00010002750	0.968321	0.792672
ENSGALG00010002814	0.900882	0.666602
ENSGALG00010003239	0.860835	0.541283
ENSGALG00010004007	0.822264	0.341794
ENSGALG00010004988	0.904525	0.606149
ENSGALG00010005217	0.905114	0.614103
ENSGALG00010005326	0.913563	0.663477
ENSGALG00010005389	0.884614	0.535375
ENSGALG00010006266	0.809392	0.544143
ENSGALG00010006345	0.96692	0.732609
ENSGALG00010006457	0.857849	0.60587
ENSGALG00010007011	0.818098	0.494746
ENSGALG00010007859	0.823335	0.658346
ENSGALG00010007879	0.927869	0.691665
ENSGALG00010007887	0.830552	0.642894
ENSGALG00010007916	0.887426	0.648269
ENSGALG00010008101	0.882519	0.683317
ENSGALG00010008169	0.857847	0.62466
ENSGALG00010008212	0.952445	0.697446
ENSGALG00010009078	0.908836	0.530695
ENSGALG00010009139	0.873166	0.502591
ENSGALG00010009597	0.938355	0.713397
ENSGALG00010009732	0.956346	0.823178
ENSGALG00010010243	0.804796	0.460157
ENSGALG00010010358	0.96076	0.6887
ENSGALG00010010605	0.969297	0.673073
ENSGALG00010010766	0.869315	0.58054
ENSGALG00010010809	0.896058	0.575865
ENSGALG00010010828	0.85245	0.560114
ENSGALG00010010859	0.883081	0.444453
ENSGALG00010010974	0.898215	0.579274
ENSGALG00010011204	0.82323	0.466321
ENSGALG00010011316	0.833748	0.482191
ENSGALG00010011923	0.824765	0.60364
ENSGALG00010012196	0.856392	0.450882
ENSGALG00010012242	0.826881	0.664684
ENSGALG00010013082	0.813391	0.52173
ENSGALG00010013468	0.890817	0.548334
ENSGALG00010013517	0.871735	0.515415
ENSGALG00010014099	0.93606	0.663002
ENSGALG00010014809	0.870193	0.522747
ENSGALG00010015126	0.891677	0.678776
ENSGALG00010015892	0.859279	0.702063
ENSGALG00010015898	0.889736	0.76096
ENSGALG00010016129	0.954582	0.80479
ENSGALG00010016378	0.876296	0.838197
ENSGALG00010016498	0.967582	0.696588
ENSGALG00010016952	0.844629	0.658106
ENSGALG00010016956	0.976125	0.758902
ENSGALG00010018177	0.862122	0.768043
ENSGALG00010018416	0.925223	0.629738
ENSGALG00010018517	0.960145	0.722057
ENSGALG00010018564	0.937814	0.682412
ENSGALG00010018655	0.846975	0.731746
ENSGALG00010018780	0.909505	0.541498
ENSGALG00010018865	0.948929	0.631936
ENSGALG00010019477	0.927906	0.657759
ENSGALG00010019843	0.910701	0.594923
ENSGALG00010020101	0.927715	0.625388
ENSGALG00010020370	0.854184	0.548942
ENSGALG00010020374	0.884924	0.631
ENSGALG00010020623	0.930128	0.760334
ENSGALG00010020981	0.936925	0.727648
ENSGALG00010021136	0.811979	0.424279
ENSGALG00010021483	0.851434	0.596347
ENSGALG00010021748	0.883377	0.637864
ENSGALG00010021841	0.945332	0.710799
ENSGALG00010021989	0.923201	0.644725
ENSGALG00010022162	0.963083	0.783534
ENSGALG00010022480	0.945881	0.66412
ENSGALG00010022489	0.966623	0.780322
ENSGALG00010023017	0.937721	0.644392
ENSGALG00010023065	0.934849	0.562707
ENSGALG00010023134	0.965196	0.675038
ENSGALG00010023147	0.912635	0.559115
ENSGALG00010023264	0.890019	0.73769
ENSGALG00010023359	0.877253	0.701396
ENSGALG00010023526	0.872801	0.577107
ENSGALG00010023854	0.800578	0.558736
ENSGALG00010024480	0.913941	0.545406
ENSGALG00010024563	0.81989	0.666399
ENSGALG00010024722	0.949874	0.679661
ENSGALG00010024729	0.975347	0.801287
ENSGALG00010024871	0.896276	0.713112
ENSGALG00010024953	0.954686	0.664739
ENSGALG00010025272	0.964717	0.725462
ENSGALG00010025358	0.965501	0.683099
ENSGALG00010025380	0.891312	0.596499
ENSGALG00010025527	0.835215	0.493271
ENSGALG00010027926	0.823822	0.693914
ENSGALG00010028180	0.859115	0.618025
ENSGALG00010028528	0.901201	0.66166
ENSGALG00010029249	0.892167	0.705483
ENSGALG00010029317	0.928778	0.629909
ENSGALG00010029654	0.897588	0.563523

## Sheet: Table S9
Table S9.Enriched GO and KEGG pathways for hub genes on the red module
Source	Term	Pvalue	Number
GO:MF	single-stranded DNA helicase activity	4.25345e-08	6
GO:MF	DNA helicase activity	3.80128e-07	7
GO:MF	kinetochore binding	1.0635e-06	4
GO:MF	catalytic activity, acting on DNA	1.19799e-06	11
GO:MF	ATP binding	1.77521e-06	22
GO:MF	adenyl ribonucleotide binding	2.69441e-06	22
GO:MF	helicase activity	2.81727e-06	8
GO:MF	adenyl nucleotide binding	6.9069e-06	22
GO:MF	ATP-dependent activity	1.67393e-05	13
GO:MF	ATP-dependent activity, acting on DNA	3.38337e-05	7
GO:MF	nucleotide binding	4.29851e-05	24
GO:MF	nucleoside phosphate binding	4.29851e-05	24
GO:MF	purine ribonucleoside triphosphate binding	4.29851e-05	22
GO:MF	purine ribonucleotide binding	5.61916e-05	22
GO:MF	ribonucleotide binding	6.06879e-05	22
GO:MF	single-stranded DNA binding	6.06879e-05	6
GO:MF	carbohydrate derivative binding	8.37513e-05	23
GO:MF	purine nucleotide binding	0.000115682	22
GO:MF	DNA binding	0.000126938	21
GO:MF	heterocyclic compound binding	0.000149832	39
GO:MF	binding	0.000155281	66
GO:MF	organic cyclic compound binding	0.00019033	39
GO:MF	catalytic activity, acting on a nucleic acid	0.000217213	12
GO:MF	small molecule binding	0.000217213	24
GO:MF	anion binding	0.000328677	23
GO:MF	microtubule binding	0.000455204	7
GO:MF	tubulin binding	0.000532166	8
GO:MF	protein kinase binding	0.000593071	10
GO:MF	chromatin binding	0.000849989	9
GO:MF	histone binding	0.00114391	6
GO:MF	enzyme binding	0.0011517	18
GO:MF	kinase binding	0.0014324	10
GO:MF	protein kinase regulator activity	0.00144908	6
GO:MF	microtubule motor activity	0.00162533	4
GO:MF	kinase regulator activity	0.00249314	6
GO:MF	cyclin-dependent protein serine/threonine kinase activator activity	0.00320776	2
GO:MF	DNA binding, bending	0.00423955	2
GO:MF	5'-3' DNA helicase activity	0.00423955	2
GO:MF	cyclin-dependent protein serine/threonine kinase regulator activity	0.00513112	3
GO:MF	protein binding	0.00563687	47
GO:MF	transferase activity, transferring phosphorus-containing groups	0.00593841	12
GO:MF	protein kinase activity	0.00839264	9
GO:MF	enzyme activator activity	0.00925256	7
GO:MF	cytoskeletal motor activity	0.0098914	4
GO:MF	DNA N-glycosylase activity	0.0110555	2
GO:MF	DNA polymerase activity	0.0135125	3
GO:MF	methylated histone binding	0.0135125	3
GO:MF	methylation-dependent protein binding	0.0148398	3
GO:MF	DNA polymerase binding	0.0159833	2
GO:MF	DNA-directed DNA polymerase activity	0.0201463	2
GO:MF	phosphotransferase activity, alcohol group as acceptor	0.0217651	9
GO:MF	kinetochore adaptor activity	0.0260196	1
GO:MF	site-specific endodeoxyribonuclease activity, specific for altered base	0.0260196	1
GO:MF	transmembrane receptor protein tyrosine kinase inhibitor activity	0.0260196	1
GO:MF	5'-3' DNA/RNA helicase activity	0.0260196	1
GO:MF	ion binding	0.0260196	29
GO:MF	hydrolase activity, hydrolyzing N-glycosyl compounds	0.0289869	2
GO:MF	nucleic acid binding	0.0289869	22
GO:MF	cyclin binding	0.0308125	2
GO:MF	kinase activity	0.0308125	9
GO:MF	enzyme regulator activity	0.0352302	10
GO:MF	purine-specific mismatch base pair DNA N-glycosylase activity	0.0427409	1
GO:MF	DNA polymerase processivity factor activity	0.0427409	1
GO:MF	DNA strand exchange activity	0.0427409	1
GO:MF	histone deacetylase regulator activity	0.0427409	1
GO:MF	telomeric DNA binding	0.0427409	2
GO:MF	identical protein binding	0.0427409	14
GO:MF	non-sequence-specific DNA binding, bending	0.0427409	1
GO:MF	protein kinase activator activity	0.0429455	3
GO:MF	transferase activity	0.0441553	17
GO:MF	non-membrane spanning protein tyrosine kinase activity	0.0484171	2
GO:MF	kinase activator activity	0.0484171	3
GO:BP	cell cycle	1.34617e-46	63
GO:BP	cell cycle process	5.32814e-45	57
GO:BP	mitotic cell cycle	1.03901e-40	49
GO:BP	chromosome organization	3.50916e-40	43
GO:BP	chromosome segregation	2.76167e-39	38
GO:BP	mitotic cell cycle process	2.76167e-39	45
GO:BP	nuclear chromosome segregation	5.73571e-35	33
GO:BP	nuclear division	1.43941e-32	34
GO:BP	organelle fission	1.02998e-30	34
GO:BP	mitotic nuclear division	1.89388e-27	27
GO:BP	sister chromatid segregation	1.6529e-25	24
GO:BP	mitotic sister chromatid segregation	2.86937e-25	23
GO:BP	organelle organization	2.61728e-20	57
GO:BP	regulation of cell cycle	2.19884e-19	34
GO:BP	regulation of cell cycle process	4.7872e-18	28
GO:BP	DNA replication	7.8306e-15	18
GO:BP	DNA-templated DNA replication	2.84482e-14	15
GO:BP	kinetochore organization	1.82094e-13	9
GO:BP	attachment of spindle microtubules to kinetochore	2.23643e-13	10
GO:BP	cell division	2.25271e-13	19
GO:BP	microtubule cytoskeleton organization involved in mitosis	9.85033e-13	14
GO:BP	regulation of chromosome segregation	3.76141e-12	12
GO:BP	regulation of chromosome organization	7.13141e-12	15
GO:BP	spindle organization	7.16008e-12	14
GO:BP	protein localization to chromosome, centromeric region	2.66825e-11	8
GO:BP	mitotic spindle organization	2.66825e-11	12
GO:BP	centromere complex assembly	4.12711e-11	8
GO:BP	cellular component organization	5.66376e-11	60
GO:BP	positive regulation of cell cycle process	8.63207e-11	14
GO:BP	protein localization to kinetochore	9.42377e-11	7
GO:BP	protein localization to condensed chromosome	9.42377e-11	7
GO:BP	mitotic chromosome condensation	9.42377e-11	7
GO:BP	DNA metabolic process	1.24291e-10	25
GO:BP	protein-DNA complex assembly	1.50142e-10	12
GO:BP	cellular component organization or biogenesis	1.92582e-10	60
GO:BP	protein-DNA complex subunit organization	6.29796e-10	12
GO:BP	regulation of chromosome separation	7.33128e-10	9
GO:BP	microtubule cytoskeleton organization	1.0784e-09	19
GO:BP	regulation of mitotic nuclear division	1.26788e-09	10
GO:BP	chromosome separation	1.86361e-09	9
GO:BP	positive regulation of cell cycle	2.38043e-09	14
GO:BP	protein localization to chromosome	3.15086e-09	10
GO:BP	regulation of organelle organization	3.15086e-09	24
GO:BP	chromosome condensation	3.25502e-09	7
GO:BP	meiotic nuclear division	3.47562e-09	11
GO:BP	DNA unwinding involved in DNA replication	4.9159e-09	6
GO:BP	DNA repair	4.9159e-09	17
GO:BP	regulation of mitotic cell cycle	8.62455e-09	16
GO:BP	meiotic cell cycle process	8.88538e-09	11
GO:BP	DNA damage response	1.24335e-08	20
GO:BP	kinetochore assembly	1.30661e-08	6
GO:BP	regulation of nuclear division	1.31789e-08	10
GO:BP	mitotic cell cycle phase transition	1.42384e-08	15
GO:BP	cell cycle phase transition	1.94534e-08	16
GO:BP	mitotic cytokinesis	2.2139e-08	8
GO:BP	regulation of mitotic metaphase/anaphase transition	2.2139e-08	8
GO:BP	meiotic cell cycle	2.29992e-08	11
GO:BP	metaphase/anaphase transition of mitotic cell cycle	3.05633e-08	8
GO:BP	non-membrane-bounded organelle assembly	3.37746e-08	14
GO:BP	regulation of metaphase/anaphase transition of cell cycle	3.51094e-08	8
GO:BP	metaphase/anaphase transition of cell cycle	4.82098e-08	8
GO:BP	microtubule-based process	7.30116e-08	20
GO:BP	nuclear DNA replication	7.96484e-08	6
GO:BP	regulation of sister chromatid segregation	8.58888e-08	8
GO:BP	mitotic sister chromatid separation	1.22196e-07	7
GO:BP	cytoskeleton-dependent cytokinesis	1.48277e-07	8
GO:BP	meiotic chromosome segregation	1.67581e-07	8
GO:BP	negative regulation of chromosome organization	1.88964e-07	8
GO:BP	positive regulation of chromosome condensation	2.28469e-07	4
GO:BP	cell cycle DNA replication	2.43404e-07	6
GO:BP	regulation of DNA metabolic process	2.92215e-07	14
GO:BP	DNA geometric change	3.33761e-07	7
GO:BP	DNA replication initiation	3.94787e-07	6
GO:BP	DNA conformation change	8.36793e-07	7
GO:BP	spindle assembly checkpoint signaling	9.19986e-07	6
GO:BP	cytokinesis	9.19986e-07	9
GO:BP	mitotic spindle checkpoint signaling	9.19986e-07	6
GO:BP	base-excision repair	9.19986e-07	6
GO:BP	mitotic spindle assembly checkpoint signaling	9.19986e-07	6
GO:BP	spindle checkpoint signaling	1.12023e-06	6
GO:BP	negative regulation of mitotic sister chromatid segregation	1.30575e-06	6
GO:BP	negative regulation of mitotic sister chromatid separation	1.30575e-06	6
GO:BP	negative regulation of mitotic metaphase/anaphase transition	1.30575e-06	6
GO:BP	negative regulation of sister chromatid segregation	1.30575e-06	6
GO:BP	negative regulation of chromosome separation	1.85022e-06	6
GO:BP	negative regulation of metaphase/anaphase transition of cell cycle	1.85022e-06	6
GO:BP	negative regulation of chromosome segregation	1.85022e-06	6
GO:BP	establishment of chromosome localization	2.06999e-06	7
GO:BP	regulation of mitotic sister chromatid segregation	2.14653e-06	6
GO:BP	regulation of mitotic sister chromatid separation	2.14653e-06	6
GO:BP	regulation of chromosome condensation	2.38658e-06	4
GO:BP	chromosome localization	2.52615e-06	7
GO:BP	DNA duplex unwinding	4.03946e-06	6
GO:BP	negative regulation of mitotic nuclear division	4.03946e-06	6
GO:BP	negative regulation of nuclear division	6.31936e-06	6
GO:BP	regulation of attachment of spindle microtubules to kinetochore	1.04949e-05	4
GO:BP	spindle assembly	1.27346e-05	7
GO:BP	metaphase plate congression	1.38569e-05	6
GO:BP	positive regulation of chromosome separation	1.48831e-05	4
GO:BP	attachment of mitotic spindle microtubules to kinetochore	1.48831e-05	4
GO:BP	regulation of DNA replication	1.48831e-05	7
GO:BP	regulation of mitotic cell cycle phase transition	1.76895e-05	10
GO:BP	regulation of protein localization to kinetochore	1.79292e-05	3
GO:BP	positive regulation of protein localization to kinetochore	1.79292e-05	3
GO:BP	regulation of cell cycle phase transition	1.79621e-05	11
GO:BP	cell cycle checkpoint signaling	1.91383e-05	8
GO:BP	positive regulation of chromosome segregation	2.81066e-05	4
GO:BP	mitotic cell cycle checkpoint signaling	3.6686e-05	7
GO:BP	DNA strand elongation involved in DNA replication	4.255e-05	3
GO:BP	negative regulation of organelle organization	4.37788e-05	10
GO:BP	regulation of cytokinesis	4.66684e-05	6
GO:BP	mitotic metaphase plate congression	6.91458e-05	5
GO:BP	negative regulation of cell cycle process	7.01646e-05	9
GO:BP	double-strand break repair	7.92772e-05	9
GO:BP	cytoskeleton organization	0.000101938	20
GO:BP	positive regulation of chromosome organization	0.000110592	6
GO:BP	negative regulation of mitotic cell cycle phase transition	0.000164352	7
GO:BP	negative regulation of cell cycle phase transition	0.000164352	8
GO:BP	regulation of cell division	0.000171217	7
GO:BP	cellular response to stress	0.000171217	22
GO:BP	positive regulation of cytokinesis	0.000174018	4
GO:BP	mitotic spindle assembly	0.000189973	5
GO:BP	female meiotic nuclear division	0.000206123	4
GO:BP	mitotic DNA replication	0.000206286	3
GO:BP	regulation of cellular component organization	0.000366666	24
GO:BP	cytokinetic process	0.000390357	4
GO:BP	negative regulation of cell cycle	0.000394822	9
GO:BP	protein localization to organelle	0.000416286	14
GO:BP	actomyosin contractile ring assembly	0.000522561	2
GO:BP	assembly of actomyosin apparatus involved in cytokinesis	0.000522561	2
GO:BP	actomyosin contractile ring organization	0.000522561	2
GO:BP	telomere maintenance	0.000560212	6
GO:BP	telomere organization	0.00062515	6
GO:BP	sexual reproduction	0.000659022	12
GO:BP	meiosis I	0.000742238	5
GO:BP	negative regulation of mitotic cell cycle	0.000743172	7
GO:BP	cell cycle G2/M phase transition	0.000761163	6
GO:BP	organelle assembly	0.00076413	14
GO:BP	spindle localization	0.000799022	4
GO:BP	meiosis I cell cycle process	0.000834104	5
GO:BP	protein-containing complex assembly	0.00119602	18
GO:BP	regulation of DNA repair	0.0013692	6
GO:BP	mitotic telomere maintenance via semi-conservative replication	0.00141965	2
GO:BP	regulation of cytokinetic process	0.00141965	2
GO:BP	regulation of transferase activity	0.00189087	12
GO:BP	regulation of DNA biosynthetic process	0.00192996	5
GO:BP	establishment of organelle localization	0.00201285	8
GO:BP	positive regulation of DNA metabolic process	0.0021879	7
GO:BP	positive regulation of cell division	0.00254583	4
GO:BP	negative regulation of DNA metabolic process	0.00264282	5
GO:BP	telomere maintenance via semi-conservative replication	0.00264282	2
GO:BP	female meiosis chromosome segregation	0.00264282	2
GO:BP	double-strand break repair via break-induced replication	0.00264282	2
GO:BP	mitotic spindle midzone assembly	0.00264282	2
GO:BP	female gamete generation	0.00288858	5
GO:BP	organelle localization	0.00339734	9
GO:BP	DNA recombination	0.0037268	7
GO:BP	telomere maintenance via telomere lengthening	0.00387559	4
GO:BP	G2/M transition of mitotic cell cycle	0.00387559	5
GO:BP	DNA biosynthetic process	0.00388192	6
GO:BP	base-excision repair, gap-filling	0.00411726	2
GO:BP	spindle elongation	0.00411726	2
GO:BP	mitotic spindle elongation	0.00411726	2
GO:BP	regulation of mitotic cytokinesis	0.00411726	2
GO:BP	DNA strand elongation	0.00454372	3
GO:BP	protein-containing complex organization	0.00463822	18
GO:BP	positive regulation of DNA replication	0.00510475	3
GO:BP	negative regulation of cellular component organization	0.00536572	10
GO:BP	reproductive process	0.00540732	13
GO:BP	positive regulation of mitotic cell cycle phase transition	0.00554967	4
GO:BP	establishment of mitotic spindle localization	0.00563658	3
GO:BP	meiotic chromosome separation	0.00569758	2
GO:BP	meiotic spindle assembly	0.00569758	2
GO:BP	spindle midzone assembly	0.00569758	2
GO:BP	cellular component assembly	0.00569758	25
GO:BP	meiotic cell cycle phase transition	0.00569758	2
GO:BP	reproduction	0.00569758	13
GO:BP	negative regulation of telomerase activity	0.00789381	2
GO:BP	double-strand break repair via homologous recombination	0.00877645	5
GO:BP	recombinational repair	0.00877645	5
GO:BP	DNA-templated DNA replication maintenance of fidelity	0.00901615	3
GO:BP	replication fork processing	0.00901615	3
GO:BP	establishment of spindle localization	0.00901615	3
GO:BP	regulation of mitotic spindle organization	0.00901615	3
GO:BP	positive regulation of transferase activity	0.0102235	8
GO:BP	positive regulation of cell cycle phase transition	0.0104156	4
GO:BP	regulation of DNA-templated DNA replication	0.0107292	3
GO:BP	regulation of spindle organization	0.0116803	3
GO:BP	regulation of telomere maintenance via telomerase	0.012546	3
GO:BP	DNA replication checkpoint signaling	0.012546	2
GO:BP	regulation of telomerase activity	0.012546	3
GO:BP	positive regulation of cellular process	0.0137862	36
GO:BP	positive regulation of organelle organization	0.0137862	8
GO:BP	positive regulation of mitotic cell cycle	0.0149061	4
GO:BP	regulation of double-strand break repair	0.0149061	4
GO:BP	somatic hypermutation of immunoglobulin genes	0.0150763	2
GO:BP	meiotic spindle organization	0.0150763	2
GO:BP	cellular component biogenesis	0.0156577	25
GO:BP	protein phosphorylation	0.0171044	16
GO:BP	negative regulation of DNA replication	0.0178006	2
GO:BP	positive regulation of DNA-directed DNA polymerase activity	0.0178006	2
GO:BP	regulation of DNA-directed DNA polymerase activity	0.0178006	2
GO:BP	somatic diversification of immune receptors via somatic mutation	0.0178006	2
GO:BP	positive regulation of biological process	0.0180901	39
GO:BP	phosphorylation	0.0182043	17
GO:BP	chromosome organization involved in meiotic cell cycle	0.0185441	3
GO:BP	regulation of telomere maintenance via telomere lengthening	0.0185441	3
GO:BP	telomere maintenance via telomerase	0.0198119	3
GO:BP	negative regulation of telomere maintenance via telomerase	0.0206533	2
GO:BP	cellular process	0.0221164	86
GO:BP	regulation of mitotic cell cycle spindle assembly checkpoint	0.0236196	2
GO:BP	regulation of spindle checkpoint	0.0236196	2
GO:BP	regulation of nuclease activity	0.0236196	2
GO:BP	mitochondrial DNA replication	0.0236196	2
GO:BP	regulation of mitotic spindle checkpoint	0.0236196	2
GO:BP	establishment of cell polarity	0.0256655	4
GO:BP	cellular response to ionizing radiation	0.0280278	3
GO:BP	positive regulation of DNA biosynthetic process	0.0332192	3
GO:BP	regulation of microtubule-based process	0.0339667	5
GO:BP	negative regulation of double-strand break repair via homologous recombination	0.0347971	2
GO:BP	negative regulation of telomere maintenance via telomere lengthening	0.0347971	2
GO:BP	regulation of microtubule cytoskeleton organization	0.0347971	4
GO:BP	regulation of double-strand break repair via homologous recombination	0.0382337	3
GO:BP	deoxyribonucleotide biosynthetic process	0.0383033	2
GO:BP	mitotic cytokinetic process	0.0383033	2
GO:BP	deoxyribose phosphate biosynthetic process	0.0383033	2
GO:BP	2'-deoxyribonucleotide biosynthetic process	0.0383033	2
GO:BP	microtubule plus-end directed mitotic chromosome migration	0.0387744	1
GO:BP	regulation of cytokinesis, actomyosin contractile ring assembly	0.0387744	1
GO:BP	lateral attachment of mitotic spindle microtubules to kinetochore	0.0387744	1
GO:BP	negative regulation of telomeric D-loop disassembly	0.0387744	1
GO:BP	base-excision repair, AP site formation via deaminated base removal	0.0387744	1
GO:BP	female meiosis chromosome separation	0.0387744	1
GO:BP	positive regulation of glycogen catabolic process	0.0387744	1
GO:BP	negative regulation of asymmetric cell division	0.0387744	1
GO:BP	DNA replication, Okazaki fragment processing	0.0387744	1
GO:BP	meiotic spindle assembly checkpoint signaling	0.0387744	1
GO:BP	DNA strand elongation involved in cell cycle DNA replication	0.0387744	1
GO:BP	DNA strand elongation involved in nuclear cell cycle DNA replication	0.0387744	1
GO:BP	DNA strand elongation involved in mitotic DNA replication	0.0387744	1
GO:BP	protein localization to meiotic spindle midzone	0.0387744	1
GO:BP	negative regulation of centriole-centriole cohesion	0.0387744	1
GO:BP	positive regulation of G2/M transition of mitotic cell cycle	0.0387744	2
GO:BP	positive regulation of shelterin complex assembly	0.0387744	1
GO:BP	regulation of telomeric D-loop disassembly	0.0387744	1
GO:BP	lagging strand elongation	0.0387744	1
GO:BP	regulation of exonuclease activity	0.0387744	1
GO:BP	positive regulation of myeloid progenitor cell differentiation	0.0387744	1
GO:BP	protein localization to meiotic spindle	0.0387744	1
GO:BP	negative regulation of protein localization to kinetochore	0.0387744	1
GO:BP	negative regulation of telomeric loop disassembly	0.0387744	1
GO:BP	negative regulation of exonuclease activity	0.0387744	1
GO:BP	regulation of establishment of RNA localization to telomere	0.0387744	1
GO:BP	negative regulation of establishment of protein localization to telomere	0.0387744	1
GO:BP	negative regulation of establishment of RNA localization to telomere	0.0387744	1
GO:BP	mitochondrial DNA metabolic process	0.0421547	2
GO:BP	negative regulation of DNA biosynthetic process	0.0421547	2
GO:BP	activation of protein kinase activity	0.0487771	3
GO:BP	cellular response to radiation	0.0497824	4
GO:CC	chromosome	7.75449e-29	46
GO:CC	non-membrane-bounded organelle	1.89501e-22	69
GO:CC	intracellular non-membrane-bounded organelle	1.89501e-22	69
GO:CC	chromosomal region	5.03045e-22	25
GO:CC	condensed chromosome	5.37091e-21	22
GO:CC	chromosome, centromeric region	6.67313e-21	21
GO:CC	condensed chromosome, centromeric region	4.6497e-18	17
GO:CC	kinetochore	4.78285e-17	16
GO:CC	nuclear chromosome	9.67409e-14	16
GO:CC	condensin complex	1.41492e-13	7
GO:CC	nucleus	1.89208e-12	67
GO:CC	microtubule cytoskeleton	7.57342e-12	29
GO:CC	DNA packaging complex	4.14898e-11	8
GO:CC	spindle	1.4495e-10	16
GO:CC	nuclear lumen	1.64952e-09	49
GO:CC	nucleoplasm	4.57508e-09	44
GO:CC	CMG complex	1.14672e-08	5
GO:CC	supramolecular complex	1.14672e-08	24
GO:CC	membrane-enclosed lumen	2.31001e-08	49
GO:CC	intracellular organelle lumen	2.31001e-08	49
GO:CC	DNA replication preinitiation complex	2.31001e-08	5
GO:CC	organelle lumen	2.31001e-08	49
GO:CC	outer kinetochore	3.99194e-08	5
GO:CC	intracellular organelle	5.0968e-07	80
GO:CC	cytoskeleton	8.01116e-07	30
GO:CC	midbody	1.245e-06	9
GO:CC	organelle	2.59391e-06	80
GO:CC	Ndc80 complex	2.68923e-06	3
GO:CC	intercellular bridge	2.71822e-06	7
GO:CC	centrosome	3.8014e-06	15
GO:CC	intracellular anatomical structure	8.50515e-06	83
GO:CC	mitotic spindle	1.25571e-05	8
GO:CC	microtubule organizing center	3.07076e-05	15
GO:CC	cyclin-dependent protein kinase holoenzyme complex	3.47596e-05	5
GO:CC	spindle pole	3.57525e-05	7
GO:CC	microtubule	5.80781e-05	9
GO:CC	MCM complex	0.000110965	3
GO:CC	heterochromatin	0.000118761	5
GO:CC	condensed nuclear chromosome	0.000128428	5
GO:CC	centralspindlin complex	0.000261998	2
GO:CC	intracellular membrane-bounded organelle	0.000570459	68
GO:CC	membrane-bounded organelle	0.00110403	69
GO:CC	serine/threonine protein kinase complex	0.00113732	5
GO:CC	protein kinase complex	0.00217944	5
GO:CC	protein-DNA complex	0.00220211	6
GO:CC	transferase complex, transferring phosphorus-containing groups	0.00242544	7
GO:CC	spindle midzone	0.00289965	3
GO:CC	replication fork	0.00326927	4
GO:CC	nuclear replication fork	0.0043191	3
GO:CC	cleavage furrow	0.0043191	3
GO:CC	meiotic spindle	0.00688354	2
GO:CC	mitotic spindle midzone	0.00688354	2
GO:CC	contractile ring	0.00688354	2
GO:CC	nuclear ubiquitin ligase complex	0.00707649	3
GO:CC	cell division site	0.0075591	3
GO:CC	XY body	0.00810462	2
GO:CC	chromosome, telomeric region	0.0125959	4
GO:CC	kinetochore microtubule	0.0133706	2
GO:CC	protein-containing complex	0.0148188	40
GO:CC	polymeric cytoskeletal fiber	0.0149587	9
GO:CC	PCNA-p21 complex	0.0205935	1
GO:CC	DNA polymerase processivity factor complex	0.0205935	1
GO:CC	Mis6-Sim4 complex	0.0205935	1
GO:CC	cyclin B1-CDK1 complex	0.0205935	1
GO:CC	PCNA complex	0.0205935	1
GO:CC	spindle microtubule	0.0205935	3
GO:CC	host cellular component	0.0205935	1
GO:CC	BRCA1-BARD1 complex	0.0205935	1
GO:CC	chromatin	0.0205935	9
GO:CC	host cell	0.0205935	1
GO:CC	intracellular protein-containing complex	0.0207345	11
GO:CC	DNA polymerase complex	0.0207345	2
GO:CC	pericentric heterochromatin	0.0246899	2
GO:CC	sex chromosome	0.0246899	2
GO:CC	transferase complex	0.0268274	10
GO:CC	ribonucleoside-diphosphate reductase complex	0.0368284	1
GO:CC	RZZ complex	0.0368284	1
GO:CC	procentriole	0.0368284	1
GO:CC	site of DNA damage	0.0380299	3
GO:CC	ubiquitin ligase complex	0.0381307	5
GO:CC	nuclear body	0.0391355	9
GO:CC	mitotic spindle pole	0.0456213	2
GO:CC	supramolecular fiber	0.0490373	9
GO:CC	gamma DNA polymerase complex	0.0490373	1
GO:CC	BRCA1-B complex	0.0490373	1
GO:CC	CAF-1 complex	0.0490373	1
GO:CC	GINS complex	0.0490373	1
GO:CC	cyclin A2-CDK2 complex	0.0490373	1
KEGG	Cell cycle	3.18109e-16	17
KEGG	DNA replication	8.66952e-07	6
KEGG	Base excision repair	0.000473643	4
KEGG	Homologous recombination	0.00109268	4
KEGG	Fanconi anemia pathway	0.0278608	3
KEGG	Oocyte meiosis	0.0278608	4

## Sheet: Table S10
Table S10. List of differentially expressed genes in skin of Wannan male chickens at 12 weeks and the 103 hub genes in the red module.
HvsL_gene_id	the 103 hub genes in the red module
ENSGALG00010026845	ENSGALG00010000055
ENSGALG00010025782	ENSGALG00010000859
ENSGALG00010025877	ENSGALG00010001237
ENSGALG00010025902	ENSGALG00010001457
ENSGALG00010025762	ENSGALG00010001597
ENSGALG00010028239	ENSGALG00010001783
ENSGALG00010028790	ENSGALG00010002437
ENSGALG00010000509	ENSGALG00010002481
ENSGALG00010028245	ENSGALG00010002750
ENSGALG00010027418	ENSGALG00010002814
ENSGALG00010027744	ENSGALG00010003239
ENSGALG00010025885	ENSGALG00010004007
ENSGALG00010009023	ENSGALG00010004988
ENSGALG00010018662	ENSGALG00010005217
ENSGALG00010003767	ENSGALG00010005326
ENSGALG00010003389	ENSGALG00010005389
ENSGALG00010003756	ENSGALG00010006266
ENSGALG00010004319	ENSGALG00010006345
ENSGALG00010014538	ENSGALG00010006457
ENSGALG00010003722	ENSGALG00010007011
ENSGALG00010014555	ENSGALG00010007859
ENSGALG00010006816	ENSGALG00010007879
ENSGALG00010002457	ENSGALG00010007887
ENSGALG00010006605	ENSGALG00010007916
ENSGALG00010003205	ENSGALG00010008101
ENSGALG00010012083	ENSGALG00010008169
ENSGALG00010018426	ENSGALG00010008212
ENSGALG00010029679	ENSGALG00010009078
ENSGALG00010025973	ENSGALG00010009139
ENSGALG00010017056	ENSGALG00010009597
ENSGALG00010028351	ENSGALG00010009732
ENSGALG00010010736	ENSGALG00010010243
ENSGALG00010020424	ENSGALG00010010358
ENSGALG00010016808	ENSGALG00010010605
ENSGALG00010025507	ENSGALG00010010766
ENSGALG00010010730	ENSGALG00010010809
ENSGALG00010012092	ENSGALG00010010828
ENSGALG00010005851	ENSGALG00010010859
ENSGALG00010029234	ENSGALG00010010974
ENSGALG00010016599	ENSGALG00010011204
ENSGALG00010020664	ENSGALG00010011316
ENSGALG00010000599	ENSGALG00010011923
ENSGALG00010002159	ENSGALG00010012196
ENSGALG00010028450	ENSGALG00010012242
ENSGALG00010025325	ENSGALG00010013082
ENSGALG00010023543	ENSGALG00010013468
ENSGALG00010027772	ENSGALG00010013517
ENSGALG00010007324	ENSGALG00010014099
ENSGALG00010022695	ENSGALG00010014809
ENSGALG00010026046	ENSGALG00010015126
ENSGALG00010017835	ENSGALG00010015892
ENSGALG00010012892	ENSGALG00010015898
ENSGALG00010005362	ENSGALG00010016129
ENSGALG00010023612	ENSGALG00010016378
ENSGALG00010002765	ENSGALG00010016498
ENSGALG00010028360	ENSGALG00010016952
ENSGALG00010010997	ENSGALG00010016956
ENSGALG00010011589	ENSGALG00010018177
ENSGALG00010022071	ENSGALG00010018416
ENSGALG00010026036	ENSGALG00010018517
ENSGALG00010002814	ENSGALG00010018564
ENSGALG00010013501	ENSGALG00010018655
ENSGALG00010004489	ENSGALG00010018780
ENSGALG00010023017	ENSGALG00010018865
ENSGALG00010012871	ENSGALG00010019477
ENSGALG00010003812	ENSGALG00010019843
ENSGALG00010020759	ENSGALG00010020101
ENSGALG00010015390	ENSGALG00010020370
ENSGALG00010002750	ENSGALG00010020374
ENSGALG00010009597	ENSGALG00010020623
ENSGALG00010023574	ENSGALG00010020981
ENSGALG00010009732	ENSGALG00010021136
ENSGALG00010014105	ENSGALG00010021483
ENSGALG00010018517	ENSGALG00010021748
ENSGALG00010020623	ENSGALG00010021841
ENSGALG00010016956	ENSGALG00010021989
ENSGALG00010001237	ENSGALG00010022162
ENSGALG00010001854	ENSGALG00010022480
ENSGALG00010024729	ENSGALG00010022489
ENSGALG00010007916	ENSGALG00010023017
ENSGALG00010022953	ENSGALG00010023065
ENSGALG00010029207	ENSGALG00010023134
ENSGALG00010023359	ENSGALG00010023147
ENSGALG00010017105	ENSGALG00010023264
ENSGALG00010002462	ENSGALG00010023359
ENSGALG00010028460	ENSGALG00010023526
ENSGALG00010009479	ENSGALG00010023854
ENSGALG00010008212	ENSGALG00010024480
ENSGALG00010002062	ENSGALG00010024563
ENSGALG00010001520	ENSGALG00010024722
ENSGALG00010010889	ENSGALG00010024729
ENSGALG00010006514	ENSGALG00010024871
ENSGALG00010007964	ENSGALG00010024953
ENSGALG00010008203	ENSGALG00010025272
ENSGALG00010009353	ENSGALG00010025358
	ENSGALG00010025380
	ENSGALG00010025527
	ENSGALG00010027926
	ENSGALG00010028180
	ENSGALG00010028528
	ENSGALG00010029249
	ENSGALG00010029317
	ENSGALG00010029654

[truncated: 2 more sheets: Table S11, Table S12]
